# Supplementary material for: The complete genome of Blastobotrys (Arxula) adeninivorans LS3 - a yeast of biotechnological interest
Source: PubMed Central journal article supplement (PMC4022394; doi:10.1186/1754-6834-7-66), 2014-04-24

## **Additional File 1. Assemblies of 454/Roche data**

### **Assembly of 454 reads**

Table S1A Basic assembly metrics of 454 reads.

Figure S1B Cumulative contig numbers for different assemblies of 454 reads.

Figure S1C Coverage rate of total assembled bases by different size contigs.

### **Mapping of 454 reads and contigs to assembled chromosomes derived from Sanger sequences**

Table S1D Alignment between 454 reads and assembled chromosomes.

Figure S1E Coverage ratio of 454 reads and assembled chromosomes.

## Assembly of 454 reads

**Table S1A Basic assembly metrics of 454 reads**

|                                       | MIRA       | Newbler    | CLC Bio    |
|---------------------------------------|------------|------------|------------|
| Number of contigs*                    | 1,547      | 223        | 1,050      |
| Total bases                           | 12,533,674 | 11,775,502 | 13,210,769 |
| Number of contigs $\geq$ 1 kbp        | 161        | 143        | 864        |
| Total bases in contigs $\geq$ 1 kbp   | 11,830,569 | 11,742,937 | 13,131,111 |
| Max contig length                     | 425,767    | 390,644    | 107,436    |
| Number of reads in the longest contig | 37,081     | 34,325     | 9,314      |
| Mean contig length                    | 8,150      | 52,805     | 12,582     |
| N50                                   | 142,195    | 154,801    | 26,719     |

\*Only contigs > 100 bp

**Figure S1B Cumulative contig numbers for different assemblies of 454 reads**

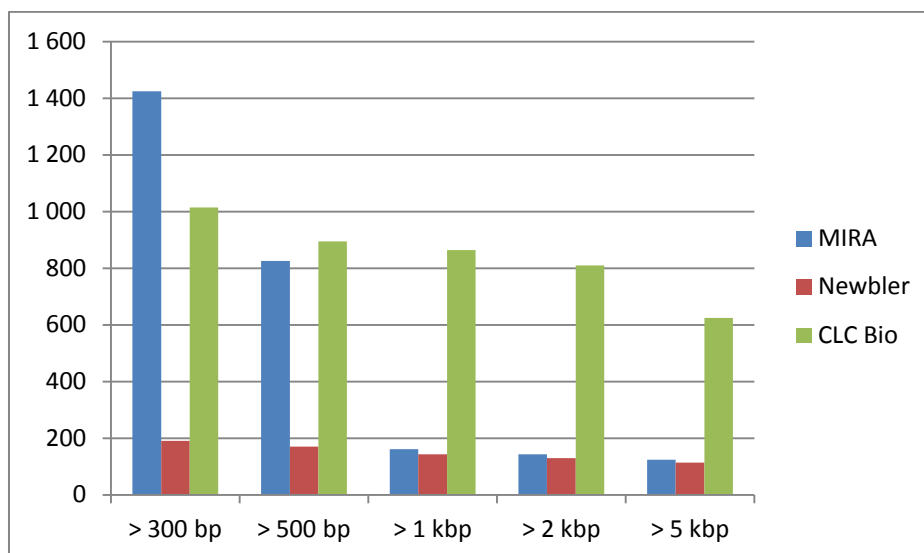

**Figure S1C Coverage rate of total assembled bases by different size contigs**

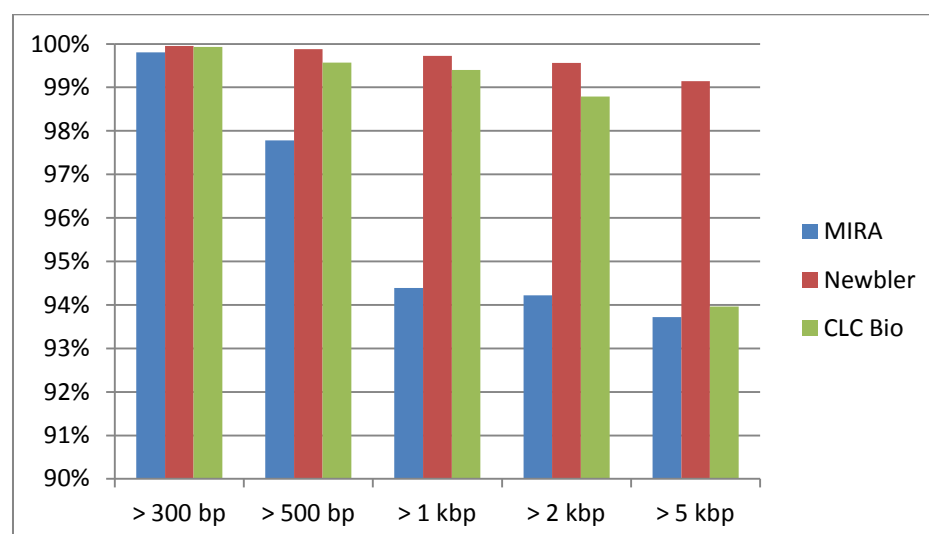

# Mapping of 454 reads and contigs to assembled chromosomes

**Table S1D Alignment between 454 reads and assembled chromosomes**

| 454 reads                  | Number    | Average length [bp] | Total bases | [%]   |
|----------------------------|-----------|---------------------|-------------|-------|
| Aligned to chromosomes     | 1,056,280 | 503                 | 531,741,216 | 98,3% |
| Not aligned to chromosomes | 17745     | 601                 | 10,657,239  | 1,7%  |
| Total                      | 1,074,025 | 505                 | 542,398,455 | 100%  |

**Figure S1E Coverage ratio of 454 reads and assembled chromosomes**

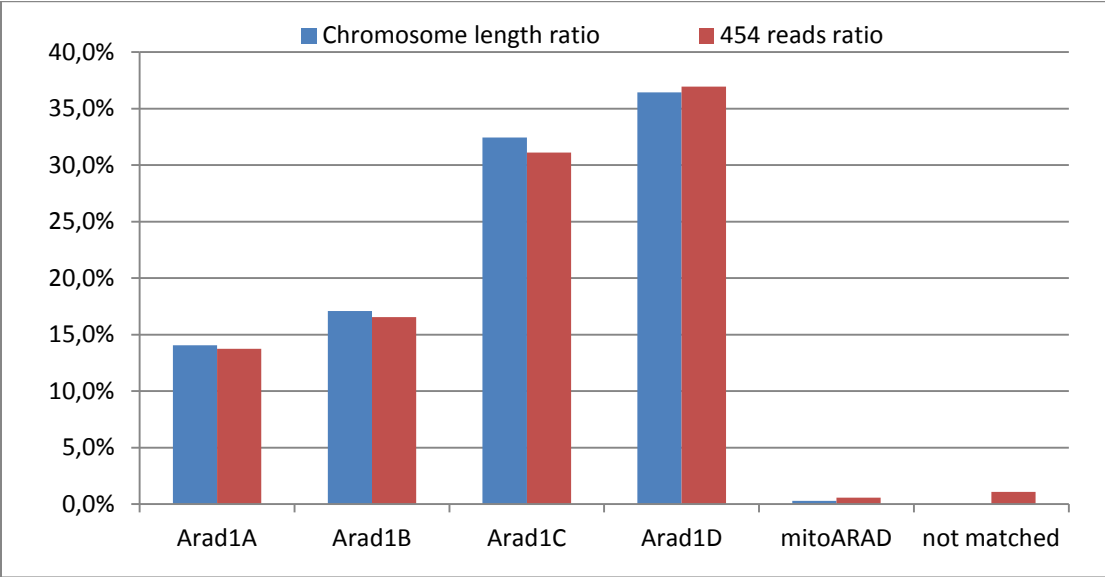

Supplement: 1754-6834-7-66-S1.pdf [file 1754-6834-7-66-S1.pdf]
