# Supplementary material for: The complete genome of Blastobotrys (Arxula) adeninivorans LS3 - a yeast of biotechnological interest
Source: PubMed Central journal article supplement (PMC4022394; doi:10.1186/1754-6834-7-66), 2014-04-24

## **Additional File 11. Tandem gene arrays in *A. adenivorans*.**

### **Table S11A List of tandem gene repeats in *A. adenivorans*.**

Tandem gene arrays (TGAs) were defined as genes of a given family separated by 0 to 10 intervening genes. After manual curation, 213 genes (including 12 pseudogenes) were assigned to 96 TGAs of one to six genes (see Table S11), most of the TGAs being in direct orientation (71.9%) as in other hemiascomycete yeasts. Compared to the whole set of CDSs, metabolic activities are over-represented among genes in TGAs (56% vs. 29%), as well as pseudogenes (5.6%, vs. 0.6%), (Table S11). Intron-containing genes on the contrary are under-represented in TGAs with seven genes only (3.3% vs. 10.6% for the whole gene set). A total of 62 tandem arrays without intervening gene were observed among TGAs. They involved 134 genes, 51 in direct repeats of up to 6 genes, 11 as inverted repeats.

TGA formation appears as a major mechanism for gene amplification of specific families of *A. adenivorans*: all 8 members of the GL3C080 family, encoding a conserved NADPH oxidoreductase (Old Yellow Enzyme or Oye), occur in two uninterrupted tandems of 6 and 2 genes.

### **Figure S11B Examples of TGA duplication.**

In the case of the two *A. adenivorans* specific gene families GL3C4746 and GL3C4726, all members but one occur in direct pairs scattered on the same chromosome (GL3C4726) or on different chromosomes (GL3C4746). Blastn searches indicated that all tandems are highly conserved at the nucleotide level, both in coding and intergenic regions (Figure S11A1 and S11A2). It also suggested that single members in each family were likely part of an initial tandem from which the second member has been lost. Phylogenetic trees are compatible with a propagation of an ancestor tandem by successive replication, leading to independent differentiation of the two members of the pair in two well separated sub-families.

**S11A1: GL3C4746**

**S11A2: GL3C4726**

### **Figure S11C: Phylogeny of TGAs associated to GLC4705 inverted repeats.**

A somewhat similar scenario may account for the formation of intermingled TGAs of members of the *A. adenivorans* specific GL3C-4702, -4704, -4705, -4708 -4718 and -4726 families (main text and Figure 2). Eighteen out of the 25 members (including five pseudogenes) of the GL3C4705 family are arranged in a head-to-head orientation within seven blocks (numbered 1 to 7 as on Fig. 2) resulting from segmental duplications of an ancestral inverted repeat of two GL3C4705 members flanked by single copies of members of the GL3C4702, GL3C4708 and/or GL3C4704 families. Members of the GL3C4704 and GL3C4708 cluster together (see Fig S11B1 and S11B2) as expected if they derive from a unique initial capture event that was subsequently replicated along with the GL3C4705 pair. Such a trend is less obvious in the case of the members of the GL3C4702 families (Figure S11B3), which suggests that several capture events occurred in this case. Circled figures refer to associated GLC4705 inverted repeats on Figure 2.

**S11C1: GL3C4704**

**S11C2: GL3C4708**

**S11C3: GL3C4702**

**Table S11A List of tandem gene repeats in *A. adenivorans*.**

| Family   | Members w/o pseudos | Gene         | Ps eudo | Position         | Length | Type                    | Annotation                                                    |
|----------|---------------------|--------------|---------|------------------|--------|-------------------------|---------------------------------------------------------------|
| GL3C0002 | 56                  | ARAD1B12496g |         | 1010029..1011603 | 1575   | DR2                     | Plasma membrane glucose sensor                                |
| GL3C0002 | 56                  | ARAD1B12518g |         | 1013670..1015286 | 1617   | DR2                     | Plasma membrane glucose sensor                                |
| GL3C0002 | 56                  | ARAD1C00220g |         | 9484..11154      | 1671   | DR3                     | Glycerol proton symporter                                     |
| GL3C0002 | 56                  | ARAD1C00242g |         | 11589..13118     | 1530   | DR3                     | Hexose transporter                                            |
| GL3C0002 | 56                  | ARAD1C00264g |         | 13900..15540     | 1641   | DR3                     | Maltose permease                                              |
| GL3C0002 | 56                  | ARAD1C00396g |         | 24361..25938     | 1578   | IR2 (1+X+1)             | Hexose transporter                                            |
| GL3C0002 | 56                  | ARAD1C00440g |         | 29468..31243     | 1776   | IR2 (1+X+1)             | Plasma membrane glucose sensor                                |
| GL3C0002 | 56                  | ARAD1C40326g |         | 3359592..3361145 | 1554   | IR2 (1+X+1)             | Galactose permease                                            |
| GL3C0002 | 56                  | ARAD1C40392g |         | 3364744..3366219 | 1476   | IR2 (1+X+1)             | Myo inositol transporter                                      |
| GL3C0002 | 56                  | ARAD1C40678g |         | 3389670..3391277 | 1608   | DR2 (1+3X+1)            | Myo inositol transporter                                      |
| GL3C0002 | 56                  | ARAD1C40766g |         | 3400238..3402127 | 1890   | DR2 (1+3X+1)            | Myo inositol transporter                                      |
| GL3C0002 | 56                  | ARAD1D18062g |         | 1479034..1481052 | 2019   | IR4 (DR2 + DR2(1+3X+1)) | High affinity maltose transporter                             |
| GL3C0002 | 56                  | ARAD1D18084g |         | 1481646..1483184 | 1539   | IR4 DR2 + DR2(1+3X+1)   | Glycerol proton symporter                                     |
| GL3C0002 | 56                  | ARAD1D18106g |         | 1483233..1484864 | 1632   | IR4 DR2 + DR2(1+3X+1)   | Maltose permease                                              |
| GL3C0002 | 56                  | ARAD1D18194g |         | 1490126..1491718 | 1593   | IR4 DR2 + DR2(1+3X+1)   | Hexose transporter                                            |
| GL3C0003 | 25                  | ARAD1A18612g |         | 1546204..1546821 | 618    | DR2 (1+10X+1)           | Small GTPase                                                  |
| GL3C0003 | 25                  | ARAD1A18854g |         | 1562290..1562937 | 648    | DR2 (1+10X+1)           | Small GTPase                                                  |
| GL3C0005 | 27                  | ARAD1A09570g |         | 789415..790500   | 1086   | DR2                     | Xylitol dehydrogenase                                         |
| GL3C0005 | 27                  | ARAD1A09592g |         | 790731..791765   | 1035   | DR2                     | Xylitol dehydrogenase                                         |
| GL3C0005 | 27                  | ARAD1D13794g |         | 1120221..1121246 | 1026   | IR2 (1+9X+1)            | Conserved hypothetical protein, unknown function              |
| GL3C0005 | 27                  | ARAD1D14014g |         | 1140651..1141676 | 1026   | IR2 (1+9X+1)            | Conserved hypothetical protein, unknown function              |
| GL3C0006 | 26                  | ARAD1C19206g |         | 1573554..1575074 | 1521   | DR2 (1+X+1)             | Nitrate transporter                                           |
| GL3C0006 | 26                  | ARAD1C19250g |         | 1576032..1577546 | 1515   | DR2 (1+X+1)             | Nitrate transporter                                           |
| GL3C0006 | 26                  | ARAD1C20174g |         | 1671042..1672535 | 1494   | DR2 (1+X+1)             | High affinity nicotinic acid plasma membrane permease         |
| GL3C0006 | 26                  | ARAD1C20218g |         | 1674171..1675700 | 1530   | DR2 (1+X+1)             | Allantoin permease                                            |
| GL3C0007 | 32                  | ARAD1D12672g |         | 1027635..1029350 | 1716   | DR2                     | Multidrug transporter of the MFS superfamily                  |
| GL3C0007 | 32                  | ARAD1D12694g |         | 1030244..1031947 | 1704   | DR2                     | Multidrug transporter of the MFS superfamily                  |
| GL3C0007 | 32                  | ARAD1D18524g |         | 1517667..1519136 | 1470   | DR2                     | Polyamine transport protein                                   |
| GL3C0007 | 32                  | ARAD1D18546g |         | 1519739..1521220 | 1482   | DR2                     | Polyamine transport protein                                   |
| GL3C0008 | 42                  | ARAD1B01562g |         | 142849..143607   | 759    | DR2 (1+8X+1)            | 2 4 dienoyl CoA reductase                                     |
| GL3C0008 | 42                  | ARAD1B01848g |         | 167100..167858   | 759    | DR2 (1+8X+1)            | 2 4 dienoyl CoA reductase                                     |
| GL3C0008 | 42                  | ARAD1C26686g |         | 2226895..2227800 | 906    | DR2                     | Acyl dihydroxyacetone phosphate reductase                     |
| GL3C0008 | 42                  | ARAD1C26708g |         | 2228068..2228913 | 846    | DR2                     | Acyl dihydroxyacetone phosphate reductase                     |
| GL3C0008 | 42                  | ARAD1C44506g |         | 3718105..3718938 | 834    | DR2 (1+8X+1)            | Conserved hypothetical protein, unknown function              |
| GL3C0008 | 42                  | ARAD1C44704g |         | 3737316..3738074 | 759    | DR2 (1+8X+1)            | Conserved hypothetical protein, unknown function              |
| GL3C0008 | 42                  | ARAD1D07590g |         | 603358..604059   | 702    | IR2 (1+8X+1)            | 2 4 dienoyl CoA reductase                                     |
| GL3C0008 | 42                  | ARAD1D07788g |         | 620279..621088   | 810    | IR2 (1+8X+1)            | 2 4 dienoyl CoA reductase                                     |
| GL3C0008 | 42                  | ARAD1D18942g |         | 1556547..1557383 | 837    | DR2 (1+X+1)             | Putative short-chain dehydrogenase/reductase                  |
| GL3C0008 | 42                  | ARAD1D19030g |         | 1559002..1559763 | 762    | DR2 (1+X+1)             | Putative short-chain dehydrogenase/reductase                  |
| GL3C0009 | 13                  | ARAD1B22814g |         | 1869154..1870845 | 1692   | DR2                     | Putative transporter of the Major Facilitator Superfamily MFS |
| GL3C0009 | 13                  | ARAD1B22836g |         | 1871167..1872885 | 1719   | DR2                     | Putative transporter of the Major Facilitator Superfamily MFS |
| GL3C0010 | 13                  | ARAD1C01474g |         | 123867..124199   | 333    | DR2                     | Ubiquitin conjugating enzyme E2                               |
| GL3C0010 | 13                  | ARAD1C01496g |         | 124495..124938   | 444    | DR2                     | Ubiquitin conjugating enzyme E2                               |
| GL3C0012 | 24                  | ARAD1B21824g |         | 1801105..1802539 | 1435   | IR2 (1+6X+1)            | Aspartyl protease                                             |
| GL3C0012 | 24                  | ARAD1B22000g |         | 1813801..1815009 | 1209   | IR2 (1+6X+1)            | Aspartyl protease                                             |
| GL3C0012 | 24                  | ARAD1C13772g |         | 1130957..1132483 | 1527   | DR4                     | SAP like aspartic protease, GPI-anchored                      |
| GL3C0012 | 24                  | ARAD1C13794g |         | 1133509..1135170 | 1662   | DR4                     | SAP like aspartic protease, GPI-anchored                      |
| GL3C0012 | 24                  | ARAD1C13816g |         | 1136120..1137679 | 1560   | DR4                     | SAP like aspartic protease, GPI-anchored                      |
| GL3C0012 | 24                  | ARAD1C13838g |         | 1138784..1140442 | 1659   | DR4                     | SAP like aspartic protease, GPI-anchored                      |

|          |    |              |     |                  |      |               |                                                                   |
|----------|----|--------------|-----|------------------|------|---------------|-------------------------------------------------------------------|
| GL3C0012 | 24 | ARAD1D08514g |     | 687271..688398   | 1128 | DR2           | GPI-anchored aspartic protease                                    |
| GL3C0012 | 24 | ARAD1D08536g |     | 689394..692858   | 3465 | DR2           | GPI-anchored aspartic protease                                    |
| GL3C0012 | 24 | ARAD1D47014g |     | 3929151..3930833 | 1683 | DR2 (1+7X+1)  | GPI anchored aspartyl protease                                    |
| GL3C0012 | 24 | ARAD1D47190g |     | 3945714..3947150 | 1437 | DR2 (1+7X+1)  | GPI anchored aspartyl protease                                    |
| GL3C0015 | 9  | ARAD1D07040g |     | 571441..573108   | 1668 | DR2 (1+6X+1)  | Subunit of the cytosolic chaperonin Cct ring complex              |
| GL3C0015 | 9  | ARAD1D07194g |     | 581386..583056   | 1671 | DR2 (1+6X+1)  | Subunit of the cytosolic chaperonin Cct ring complex              |
| GL3C0024 | 12 | ARAD1A01694g |     | 123435..123950   | 516  | IR2 (1+7X+1)  | Peptidyl prolyl cis trans isomerase                               |
| GL3C0024 | 12 | ARAD1A01870g |     | 133643..134353   | 711  | IR2 (1+7X+1)  | Peptidyl prolyl cis trans isomerase                               |
| GL3C0039 | 10 | ARAD1A00264g |     | 13504..15510     | 2007 | DR2           | Ferric reductase                                                  |
| GL3C0039 | 10 | ARAD1A00286g |     | 16931..18931     | 2001 | DR2           | Ferric reductase                                                  |
| GL3C0039 | 10 | ARAD1D37862g |     | 3170698..3172236 | 1539 | IR2 (1+8X+1)  | Ferric reductase                                                  |
| GL3C0039 | 10 | ARAD1D38060g |     | 3191392..3193434 | 2043 | IR2 (1+8X+1)  | Ferric reductase                                                  |
| GL3C0044 | 9  | ARAD1D20878g |     | 1718647..1720200 | 1554 | DR2           | Choline ethanolamine transporter                                  |
| GL3C0044 | 9  | ARAD1D20900g |     | 1720521..1722086 | 1566 | DR2           | Choline ethanolamine transporter                                  |
| GL3C0055 | 5  | ARAD1B01584g | Yes | 143859..144908   | 1050 | DR2 (1+6+1)   | putative hscarg dehydrogenase (relic)                             |
| GL3C0055 | 5  | ARAD1B01672g | Yes | 151204..152115   | 912  | DR2 (1+6X+1)  | methylglyoxal reductase (relic)                                   |
| GL3C0063 | 5  | ARAD1C17226g |     | 1409413..1410969 | 1557 | IR2 (1+4X+1)  | histone acetyltransferase                                         |
| GL3C0063 | 5  | ARAD1C17380g | Yes | 1423946..1424177 | 232  | IR2 (1+4X+1)  | histone acetyltransferase (relic)                                 |
| GL3C0074 | 6  | ARAD1C13750g |     | 1128807..1130297 | 1491 | DR2 (1+4X+1)  | Similar to MFS transporter                                        |
| GL3C0074 | 6  | ARAD1C13860g |     | 1141243..1142793 | 1551 | DR2 (1+4X+1)  | Similar to MFS transporter                                        |
| GL3C0080 | 8  | ARAD1D21714g |     | 1781907..1782998 | 1092 | DR2           | NADPH oxidoreductase containing flavin mononucleotide FMN         |
| GL3C0080 | 8  | ARAD1D21736g |     | 1783243..1784343 | 1101 | DR2           | NADPH oxidoreductase containing flavin mononucleotide FMN         |
| GL3C0080 | 8  | ARAD1D22374g | Yes | 1840341..1841489 | 1149 | DR6           | NADPH oxidoreductase containing flavin mononucleotide FMN (relic) |
| GL3C0080 | 8  | ARAD1D22396g |     | 1841914..1843035 | 1122 | DR6           | NADPH oxidoreductase containing flavin mononucleotide FMN         |
| GL3C0080 | 8  | ARAD1D22418g |     | 1843761..1844885 | 1125 | DR6           | NADPH oxidoreductase containing flavin mononucleotide FMN         |
| GL3C0080 | 8  | ARAD1D22440g |     | 1845356..1846450 | 1095 | DR6           | NADPH oxidoreductase containing flavin mononucleotide FMN         |
| GL3C0080 | 8  | ARAD1D22462g |     | 1846946..1848070 | 1125 | DR6           | NADPH oxidoreductase containing flavin mononucleotide FMN         |
| GL3C0080 | 8  | ARAD1D22484g |     | 1848343..1849428 | 1086 | DR6           | NADPH oxidoreductase containing flavin mononucleotide FMN         |
| GL3C0086 | 6  | ARAD1D43758g |     | 3632030..3633574 | 1545 | DR2           | N- formyltyrosine oxidase,sporulation- specific microsomal enzyme |
| GL3C0086 | 6  | ARAD1D43780g |     | 3634648..3636231 | 1584 | DR2           | N- formyltyrosine oxidase,sporulation- specific microsomal enzyme |
| GL3C0094 | 4  | ARAD1C33308g |     | 2777118..2777432 | 315  | DR2 (1+10X+1) | Glutaredoxin thioltransferase                                     |
| GL3C0094 | 4  | ARAD1C33550g |     | 2797163..2797511 | 349  | DR2 (1+10X+1) | Glutaredoxin thioltransferase                                     |
| GL3C0107 | 7  | ARAD1A07194g |     | 591376..593037   | 1662 | DR2           | Putative amidase                                                  |
| GL3C0107 | 7  | ARAD1A07216g |     | 593246..594907   | 1662 | DR2           | Putative amidase                                                  |
| GL3C0123 | 3  | ARAD1A01452g |     | 104941..106803   | 1863 | IR2           | Dihydrouridine synthase                                           |
| GL3C0123 | 3  | ARAD1A01474g |     | 106911..107936   | 1026 | IR2           | Dihydrouridine synthase                                           |
| GL3C0176 | 20 | ARAD1A00462g |     | 29097..31637     | 2541 | IR2 (1+9X+1)  | Conserved hypothetical protein, unknown function                  |
| GL3C0176 | 20 | ARAD1A00682g |     | 47090..48736     | 1647 | IR2 (1+9X+1)  | Conserved hypothetical protein, unknown function                  |
| GL3C0407 | 6  | ARAD1B10340g |     | 842152..843504   | 1353 | DR2 (1+8X+1)  | Hypothetical protein, unknown function                            |
| GL3C0407 | 6  | ARAD1B10560g |     | 858636..861053   | 2418 | DR2 (1+8X+1)  | Hypothetical protein, unknown function                            |
| GL3C0501 | 5  | ARAD1C26334g |     | 2201049..2201870 | 822  | IR2           | Enoyl-CoA hydratase/isomerase family protein                      |
| GL3C0501 | 5  | ARAD1C26356g |     | 2202271..2203098 | 828  | IR2           | Enoyl-CoA hydratase/isomerase family protein                      |
| GL3C0521 | 2  | ARAD1B14212g |     | 1149074..1149772 | 699  | DR2 (1+X+1)   | Putative histone acetylase                                        |

|          |    |              |                  |      |                      |                                                                                                 |
|----------|----|--------------|------------------|------|----------------------|-------------------------------------------------------------------------------------------------|
| GL3C0521 | 2  | ARAD1B14278g | 1152399..1153916 | 1518 | DR2 (1+X+1)          | Putative histone acetylase                                                                      |
| GL3C0522 | 7  | ARAD1B09240g | 761755..762774   | 1020 | DR3                  | Putative aryl alcohol dehydrogenase                                                             |
| GL3C0522 | 7  | ARAD1B09262g | 763065..764081   | 1017 | DR3                  | Putative aryl alcohol dehydrogenase                                                             |
| GL3C0522 | 7  | ARAD1B09284g | 764260..765342   | 1083 | DR3                  | Putative aryl alcohol dehydrogenase                                                             |
| GL3C3548 | 3  | ARAD1D04158g | 340149..340724   | 576  | DR2                  | Protein with eight cysteine-containing domain present in fungal extracellular membrane proteins |
| GL3C3548 | 3  | ARAD1D04180g | 341548..342282   | 735  | DR2                  | Protein with eight cysteine-containing domain present in fungal extracellular membrane proteins |
| GL3C3859 | 3  | ARAD1A05390g | 437471..439111   | 1641 | DR2 (1+6X+1)         | Conserved hypothetical protein, unknown function                                                |
| GL3C3859 | 3  | ARAD1A05544g | 448539..450179   | 1641 | DR2 (1+6X+1)         | Conserved hypothetical protein, unknown function                                                |
| GL3C4063 | 2  | ARAD1B03916g | 324115..325497   | 1383 | DR2                  | Alcohol acetyltransferase                                                                       |
| GL3C4063 | 2  | ARAD1B03938g | 325616..327064   | 1449 | DR2                  | Alcohol acetyltransferase                                                                       |
| GL3C4088 | 8  | ARAD1C00308g | 17305..19323     | 2019 | IR2 (1+4X+1)         | Putative C6 transcription factor                                                                |
| GL3C4088 | 8  | ARAD1C00418g | 26384..28441     | 2058 | IR2 (1+4X+1)         | Putative C6 transcription factor                                                                |
| GL3C4410 | 2  | ARAD1C38104g | 3164581..3169670 | 5090 | IR2                  | Chitin synthase III                                                                             |
| GL3C4410 | 2  | ARAD1C38126g | 3170823..3176087 | 5265 | IR2                  | Chitin synthase III                                                                             |
| GL3C4702 | 25 | ARAD1A12430g | 1041785..1043857 | 2073 | DR2                  | Multifunctional thiamine-phosphate pyrophosphorylase/synthase                                   |
| GL3C4702 | 25 | ARAD1A12452g | 1044731..1046716 | 1986 | DR2                  | Multifunctional thiamine-phosphate pyrophosphorylase                                            |
| GL3C4702 | 25 | ARAD1B03388g | 279108..280328   | 1221 | IR2 (1+8X+1)         | Hypothetical protein, unknown function                                                          |
| GL3C4702 | 25 | ARAD1B03586g | 296108..298180   | 2073 | IR2 (1+8X+1)         | Hypothetical protein, unknown function                                                          |
| GL3C4702 | 25 | ARAD1C13442g | 1097971..1100043 | 2073 | DR2                  | Hypothetical protein, unknown function                                                          |
| GL3C4702 | 25 | ARAD1C13464g | 1100892..1102964 | 2073 | DR2                  | Hypothetical protein, unknown function                                                          |
| GL3C4702 | 25 | ARAD1D12232g | 986690..988477   | 1788 | DR2(1+4X+1)          | Hypothetical protein, unknown function                                                          |
| GL3C4702 | 25 | ARAD1D12342g | 999172..1001239  | 2068 | DR2(1+4X+1)          | Hypothetical protein, unknown function (relic)                                                  |
| GL3C4702 | 25 | ARAD1D27764g | 2297997..2298850 | 854  | DR2 (1+X+1)          | Hypothetical protein, unknown function (relic)                                                  |
| GL3C4702 | 25 | ARAD1D27808g | 2301977..2303764 | 1788 | DR2 (1+X+1)          | Hypothetical protein, unknown function                                                          |
| GL3C4704 | 22 | ARAD1C18502g | 1515164..1517233 | 2070 | DR2                  | Hypothetical protein, unknown function                                                          |
| GL3C4704 | 22 | ARAD1C18524g | 1517616..1519688 | 2073 | DR2                  | Hypothetical protein, unknown function                                                          |
| GL3C4704 | 22 | ARAD1C19778g | 1623913..1626642 | 2730 | IR2 (1+5X+1)         | Hypothetical protein, unknown function                                                          |
| GL3C4704 | 22 | ARAD1C19910g | 1637725..1640106 | 2382 | IR2 (1+5X+1)         | Hypothetical protein, unknown function                                                          |
| GL3C4705 | 20 | ARAD1A11286g | 941679..943868   | 2190 | IR3 (IR2+X+1)        | Hypothetical protein, unknown function                                                          |
| GL3C4705 | 20 | ARAD1A11308g | 944641..946608   | 1968 | IR3 (IR2+X+1)        | Hypothetical protein, unknown function                                                          |
| GL3C4705 | 20 | ARAD1A11352g | 950335..952269   | 1935 | IR3 (IR2+X+1)        | Hypothetical protein, unknown function                                                          |
| GL3C4705 | 20 | ARAD1A13552g | 1155647..1157578 | 1932 | DR4                  | Hypothetical protein, unknown function                                                          |
| GL3C4705 | 20 | ARAD1A13574g | 1158372..1160564 | 2193 | DR4<br>(IR2+3X+IR2)  | Hypothetical protein, unknown function                                                          |
| GL3C4705 | 20 | ARAD1A13662g | 1169536..1171347 | 1812 | DR4<br>(IR2+3X+IR2)  | Hypothetical protein, unknown function                                                          |
| GL3C4705 | 20 | ARAD1A13684g | 1171412..1173046 | 1635 | DR4<br>(IR2+3X+IR2)  | Hypothetical protein, unknown function                                                          |
| GL3C4705 | 20 | ARAD1C07766g | 631304..632938   | 1635 | IR4 (IR2 +<br>X+DR2) | Hypothetical protein, unknown function                                                          |
| GL3C4705 | 20 | ARAD1C07788g | 634017..636209   | 2193 | IR4 (IR2 +<br>X+DR2) | Hypothetical protein, unknown function                                                          |
| GL3C4705 | 20 | ARAD1C07854g | 642015..643918   | 1904 | IR4 (IR2 +<br>X+DR2) | Hypothetical protein, unknown function (relic)                                                  |
| GL3C4705 | 20 | ARAD1C07876g | 644415..646226   | 1812 | IR4 (IR2 +<br>X+DR2) | Hypothetical protein, unknown function                                                          |
| GL3C4705 | 20 | ARAD1C22572g | 1902254..1903888 | 1635 | IR2                  | Hypothetical protein, unknown function                                                          |
| GL3C4705 | 20 | ARAD1C22594g | 1904238..1905938 | 1701 | IR2                  | Hypothetical protein, unknown function (relic)                                                  |
| GL3C4705 | 20 | ARAD1D04928g | 393569..394015   | 447  | DR2                  | Hypothetical protein, unknown function (relic)                                                  |
| GL3C4705 | 20 | ARAD1D04950g | 395096..396823   | 1728 | DR2                  | Hypothetical protein, unknown function                                                          |
| GL3C4705 | 20 | ARAD1D12210g | 984454..986157   | 1704 | IR3 (1+X+IR2)        | Hypothetical protein, unknown function                                                          |
| GL3C4705 | 20 | ARAD1D12254g | 989601..991265   | 1665 | IR3 (1+X+IR2)        | Hypothetical protein, unknown function                                                          |
| GL3C4705 | 20 | ARAD1D12276g | 991597..993296   | 1700 | IR3 (1+X+IR2)        | Hypothetical protein, unknown function (relic)                                                  |
| GL3C4705 | 20 | ARAD1D27786g | 2299240..2301159 | 1920 | DR2 (1+X+1)          | Hypothetical protein, unknown function                                                          |
| GL3C4705 | 20 | ARAD1D27830g | 2304724..2306415 | 1692 | DR2 (1+X+1)          | Hypothetical protein, unknown function                                                          |
| GL3C4705 | 20 | ARAD1D49192g | 4129270..4131345 | 2076 | IR3 (1+2X+IR2)       | Hypothetical protein, unknown function                                                          |
| GL3C4705 | 20 | ARAD1D49258g | 4138188..4139104 | 917  | IR3 (1+2X+IR2)       | Hypothetical protein, unknown function (relic)                                                  |

|          |    |              |     |                  |      |                |                                                |
|----------|----|--------------|-----|------------------|------|----------------|------------------------------------------------|
| GL3C4705 | 20 | ARAD1D49280g |     | 4140220..4142154 | 1935 | IR3 (1+2X+IR2) | Hypothetical protein, unknown function         |
| GL3C4708 | 14 | ARAD1A11022g |     | 920145..921932   | 1788 | DR2 (1+10X+1)  | Hypothetical protein, unknown function         |
| GL3C4708 | 14 | ARAD1A11264g |     | 939457..941148   | 1692 | DR2 (1+10X+1)  | Hypothetical protein, unknown function         |
| GL3C4708 | 14 | ARAD1C07810g |     | 636771..638531   | 1761 | IR2 (1+8X+1)   | Hypothetical protein, unknown function         |
| GL3C4708 | 14 | ARAD1C08030g |     | 656312..658300   | 1989 | IR2 (1+8X+1)   | Hypothetical protein, unknown function         |
| GL3C4711 | 11 | ARAD1D25366g |     | 2102045..2103583 | 1539 | DR3            | F-box domain protein                           |
| GL3C4711 | 11 | ARAD1D25388g | Yes | 2104153..2105657 | 1505 | DR3            | F-box domain protein (relic)                   |
| GL3C4711 | 11 | ARAD1D25432g |     | 2106199..2107794 | 1596 | DR3            | F-box domain protein                           |
| GL3C4712 | 7  | ARAD1D48422g |     | 4067306..4069144 | 1839 | DR2            | Beta-glucosidase                               |
| GL3C4712 | 7  | ARAD1D48444g |     | 4069783..4071297 | 1515 | DR2            | Beta-glucosidase                               |
| GL3C4718 | 8  | ARAD1C07700g |     | 625965..627026   | 1062 | DR2 (1+6X+1)   | Hypothetical protein, unknown function         |
| GL3C4718 | 8  | ARAD1C07898g |     | 646591..646977   | 387  | DR2 (1+6X+1)   | Hypothetical protein, unknown function         |
| GL3C4725 | 6  | ARAD1A01298g |     | 93225..93788     | 564  | IR3 (1+X+DR2)  | Hypothetical protein, unknown function         |
| GL3C4725 | 6  | ARAD1A01342g |     | 96081..96533     | 453  | IR3 (1+X+DR2)  | Hypothetical protein, unknown function         |
| GL3C4725 | 6  | ARAD1A01364g |     | 97845..98480     | 636  | IR3 (1+X+DR2)  | Hypothetical protein, unknown function         |
| GL3C4726 | 6  | ARAD1C17292g | Yes | 1414246..1416423 | 2178 | DR2            | Hypothetical protein, unknown function (relic) |
| GL3C4726 | 6  | ARAD1C17314g |     | 1416791..1419025 | 2235 | DR2            | Hypothetical protein, unknown function         |
| GL3C4726 | 6  | ARAD1C22308g |     | 1878886..1881105 | 2220 | DR2            | Hypothetical protein, unknown function         |
| GL3C4726 | 6  | ARAD1C22330g |     | 1881470..1883701 | 2232 | DR2            | Hypothetical protein, unknown function         |
| GL3C4726 | 6  | ARAD1C25762g |     | 2156959..2159193 | 2235 | DR2            | Hypothetical protein, unknown function         |
| GL3C4726 | 6  | ARAD1C25784g |     | 2159545..2161785 | 2241 | DR2            | Hypothetical protein, unknown function         |
| GL3C4736 | 5  | ARAD1D18304g |     | 1500341..1501354 | 1014 | IR3 (DR2+X+1)  | Sterol deacetylase                             |
| GL3C4736 | 5  | ARAD1D18326g |     | 1501676..1502677 | 1002 | IR3 (DR2+X+1)  | Sterol deacetylase                             |
| GL3C4736 | 5  | ARAD1D18370g |     | 1504958..1505929 | 972  | IR3 (DR2+X+1)  | Sterol deacetylase                             |
| GL3C4738 | 4  | ARAD1D46860g |     | 3915311..3917119 | 1809 | DR2            | Hypothetical protein, unknown function         |
| GL3C4738 | 4  | ARAD1D46882g |     | 3917714..3919423 | 1710 | DR2            | Hypothetical protein, unknown function         |
| GL3C4746 | 5  | ARAD1B18480g |     | 1523422..1525737 | 2316 | DR2            | Hypothetical protein, unknown function         |
| GL3C4746 | 5  | ARAD1B18502g |     | 1526336..1528672 | 2337 | DR2            | Hypothetical protein, unknown function         |
| GL3C4746 | 5  | ARAD1C21164g |     | 1767445..1769802 | 2358 | DR2            | Hypothetical protein, unknown function         |
| GL3C4746 | 5  | ARAD1C21186g |     | 1770393..1772729 | 2337 | DR2            | Hypothetical protein, unknown function         |
| GL3C4765 | 3  | ARAD1B19426g |     | 1599403..1600500 | 1098 | DR2            | Putative GPI anchored dioxygenase              |
| GL3C4765 | 3  | ARAD1B19448g |     | 1601067..1602170 | 1104 | DR2            | Putative GPI anchored dioxygenase              |
| GL3C4766 | 4  | ARAD1D46486g |     | 3880691..3882097 | 1407 | DR2            | Hypothetical protein, unknown function         |
| GL3C4766 | 4  | ARAD1D46508g |     | 3884442..3886001 | 1560 | DR2            | Hypothetical protein, unknown function         |
| GL3C4767 | 4  | ARAD1D01650g |     | 135071..137149   | 2079 | DR3            | Putative C6 transcription factor               |
| GL3C4767 | 4  | ARAD1D01672g |     | 137746..140199   | 2454 | DR3            | Putative C6 transcription factor               |
| GL3C4767 | 4  | ARAD1D01694g |     | 140493..142379   | 1887 | DR3            | Putative C6 transcription factor               |
| GL3C4808 | 2  | ARAD1B05038g |     | 419140..419874   | 735  | DR2            | Hypothetical protein, unknown function         |
| GL3C4808 | 2  | ARAD1B05060g |     | 420354..421160   | 807  | DR2            | Hypothetical protein, unknown function         |
| GL3C4812 | 2  | ARAD1D51128g |     | 4276992..4278545 | 1554 | DR2            | Putative cellulose-binding protein             |
| GL3C4812 | 2  | ARAD1D51150g |     | 4278967..4280409 | 1443 | DR2            | Putative cellulose-binding protein             |
| GL3C4932 | 3  | ARAD1B06842g |     | 550662..551336   | 675  | DR2            | Putative cutinase                              |
| GL3C4932 | 3  | ARAD1B06864g |     | 552289..552957   | 669  | DR2            | Putative cutinase                              |
| GL3C5307 | 2  | ARAD1A09614g |     | 792129..793007   | 879  | DR2            | Similarity to DTDP glucose 4 6 dehydratase     |
| GL3C5307 | 2  | ARAD1A09636g |     | 793751..794629   | 879  | DR2            | Similarity to DTDP glucose 4 6 dehydratase     |
| GL3C5672 | 1  | ARAD1D47542g | Yes | 3981064..3981841 | 778  | DR2            | Hypothetical protein, unknown function (relic) |
| GL3C5672 | 1  | ARAD1D47564g |     | 3983547..3988301 | 4755 | DR2            | Hypothetical protein, unknown function         |
| GL3M4593 | 5  | ARAD1C29480g |     | 2450287..2451387 | 1101 | DR2 (1+6X+1)   | Catalytic subunit of protein phosphatase 2A    |
| GL3M4593 | 5  | ARAD1C29634g |     | 2460259..2461323 | 1065 | DR2 (1+6X+1)   | Catalytic subunit of protein phosphatase 2A    |
| GL3R0071 | 5  | ARAD1D35662g |     | 2964804..2966198 | 1395 | DR2            | Vacuolar carboxypeptidase Y proteinase C       |
| GL3R0071 | 5  | ARAD1D35684g |     | 2966801..2968492 | 1692 | DR2            | Vacuolar carboxypeptidase Y proteinase C       |
| GL3R0174 | 5  | ARAD1A10274g |     | 846495..847850   | 1356 | IR2 (1+X+1)    | Putative mannosidase GPI anchored membrane     |

|          |   |              |                  |      |              |                                                               |
|----------|---|--------------|------------------|------|--------------|---------------------------------------------------------------|
| GL3R0174 | 5 | ARAD1A10318g | 850638..851990   | 1353 | IR2 (1+X+1)  | protein<br>Putative mannosidase GPI anchored membrane protein |
| GL3R0184 | 3 | ARAD1A02970g | 239701..240933   | 1233 | DR2          | High affinity iron permease                                   |
| GL3R0184 | 3 | ARAD1A02992g | 241978..243129   | 1152 | DR2          | High affinity iron permease                                   |
| GL3R0201 | 4 | ARAD1D26268g | 2165894..2167051 | 1158 | DR2          | High affinity zinc transporter                                |
| GL3R0201 | 4 | ARAD1D26290g | 2167529..2168662 | 1134 | DR2          | High affinity zinc transporter                                |
| GL3R0789 | 2 | ARAD1D23936g | 1989698..1990699 | 1002 | DR2          | Conserved hypothetical protein, unknown function              |
| GL3R0789 | 2 | ARAD1D23958g | 1990888..1991952 | 1065 | DR2          | Conserved hypothetical protein, unknown function              |
| GL3R0923 | 2 | ARAD1C20944g | 1740353..1741816 | 1464 | DR2          | Invertase                                                     |
| GL3R0923 | 2 | ARAD1C20966g | 1742117..1743643 | 1527 | DR2          | Invertase                                                     |
| GL3R1212 | 2 | ARAD1D30954g | 2549622..2550860 | 1239 | IR2 (1+8X+1) | D serine dehydratase                                          |
| GL3R1212 | 2 | ARAD1D31152g | 2573773..2575167 | 1395 | IR2 (1+8X+1) | D serine dehydratase                                          |
| GL3R1449 | 2 | ARAD1D01760g | 146185..146617   | 433  | IR2 (1+2X+1) | Vacuolar H ATPase subunit G                                   |
| GL3R1449 | 2 | ARAD1D01826g | 149671..150064   | 394  | IR2 (1+2X+1) | Vacuolar H ATPase subunit G                                   |
| GL3R1456 | 2 | ARAD1D07436g | 595366..595884   | 519  | DR2          | Zinc finger domain protein similar to Type I J proteins       |
| GL3R1456 | 2 | ARAD1D07458g | 596240..597079   | 840  | DR2          | Zinc finger domain protein similar to Type I J proteins       |
| GL3R1547 | 2 | ARAD1A11814g | 987118..990120   | 3003 | DR2          | Phenylcoumaran benzylic ether reductase (PCBER) like          |
| GL3R1547 | 2 | ARAD1A11836g | 990868..993882   | 3015 | DR2          | Phenylcoumaran benzylic ether reductase (PCBER) like          |
| GL3R3961 | 2 | ARAD1D12892g | 1050766..1052289 | 1524 | DR2          | Putative acid phosphatase                                     |
| GL3R3961 | 2 | ARAD1D12914g | 1052667..1054247 | 1581 | DR2          | Putative acid phosphatase                                     |

IR = inverted repeat; DR = direct repeat

If repeats are interrupted by intervening genes, the number of intervening genes is indicated in parenthesis as nX (example: 1+2X+1 for a repeat interrupted by two intervening genes).

**Figure S11B1 GL3C4746 family**

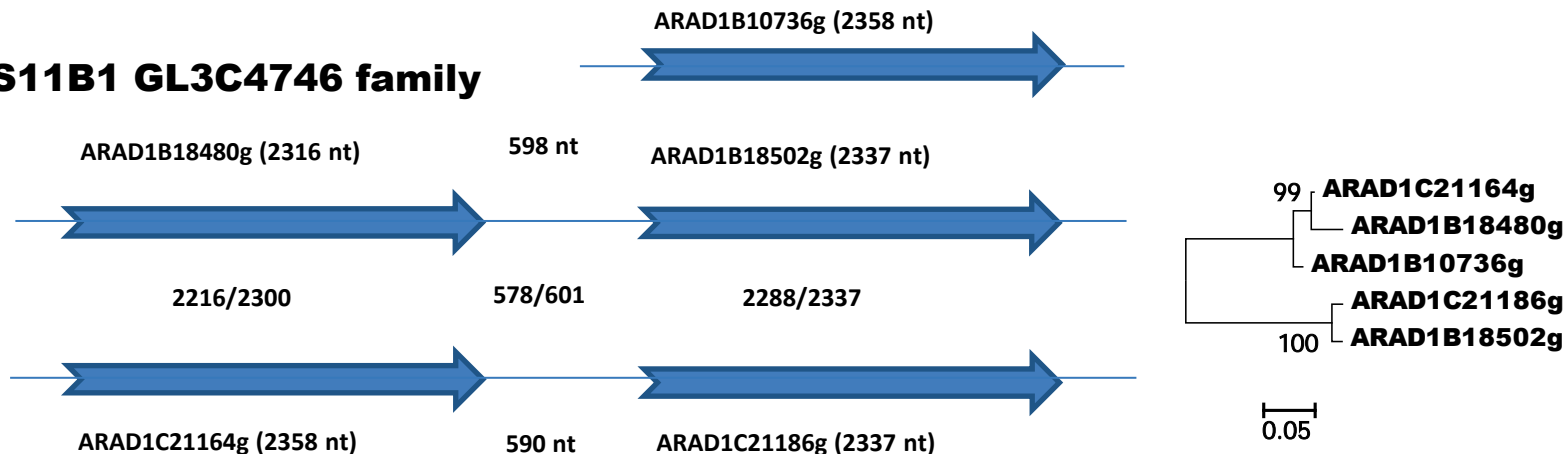

**Figure S11B2 GL3C4726 family**

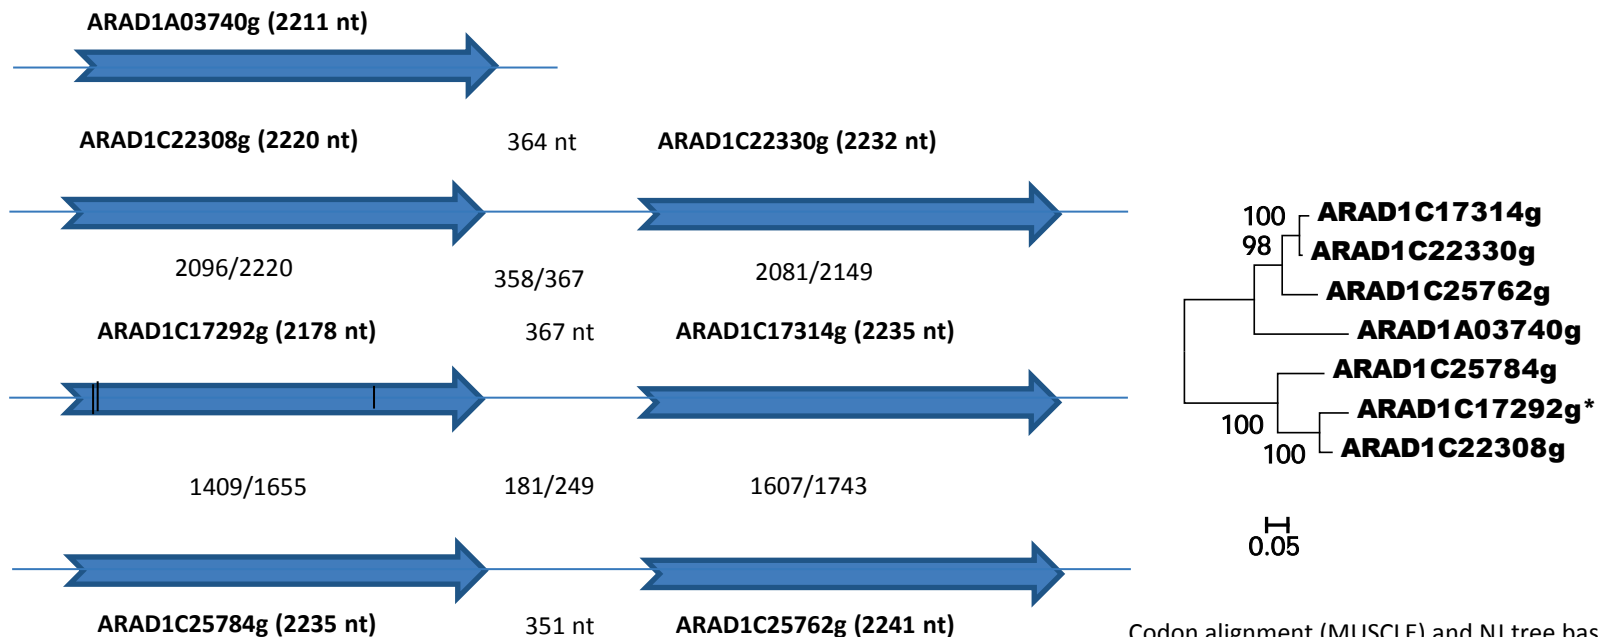

Nucleotide identity within gene and intergenes was computed based on BLASTn alignments

Codon alignment (MUSCLE) and NJ tree based on 1st and 2<sup>nd</sup> codon position. Pseudogene indicated by \*.

# Figure S11C1 GL3C4704 family

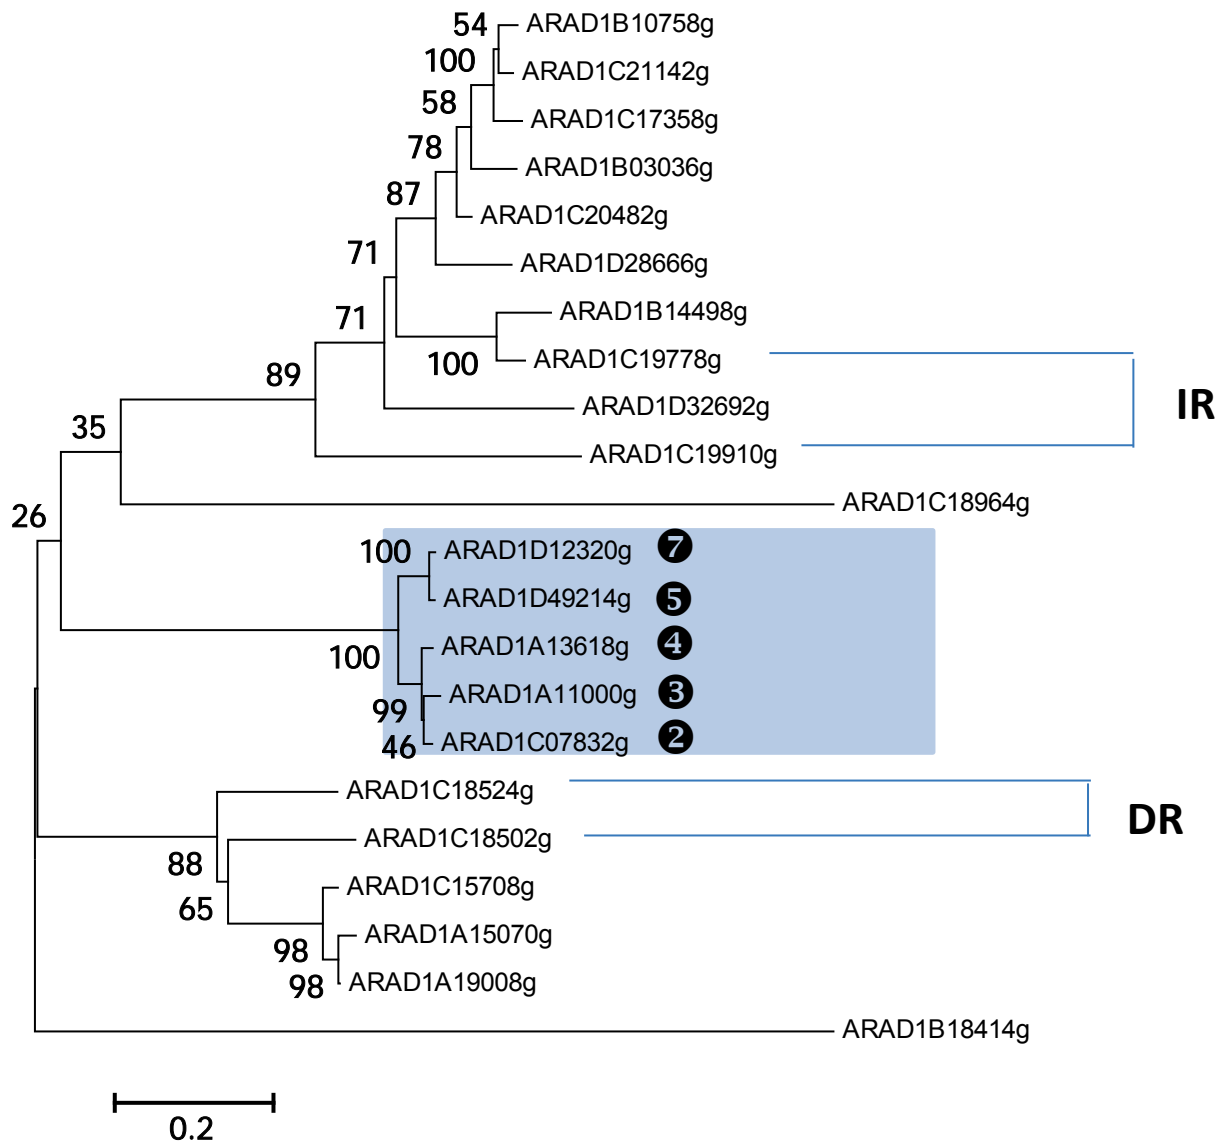



**Figure S11C2 GL3C4708 family**

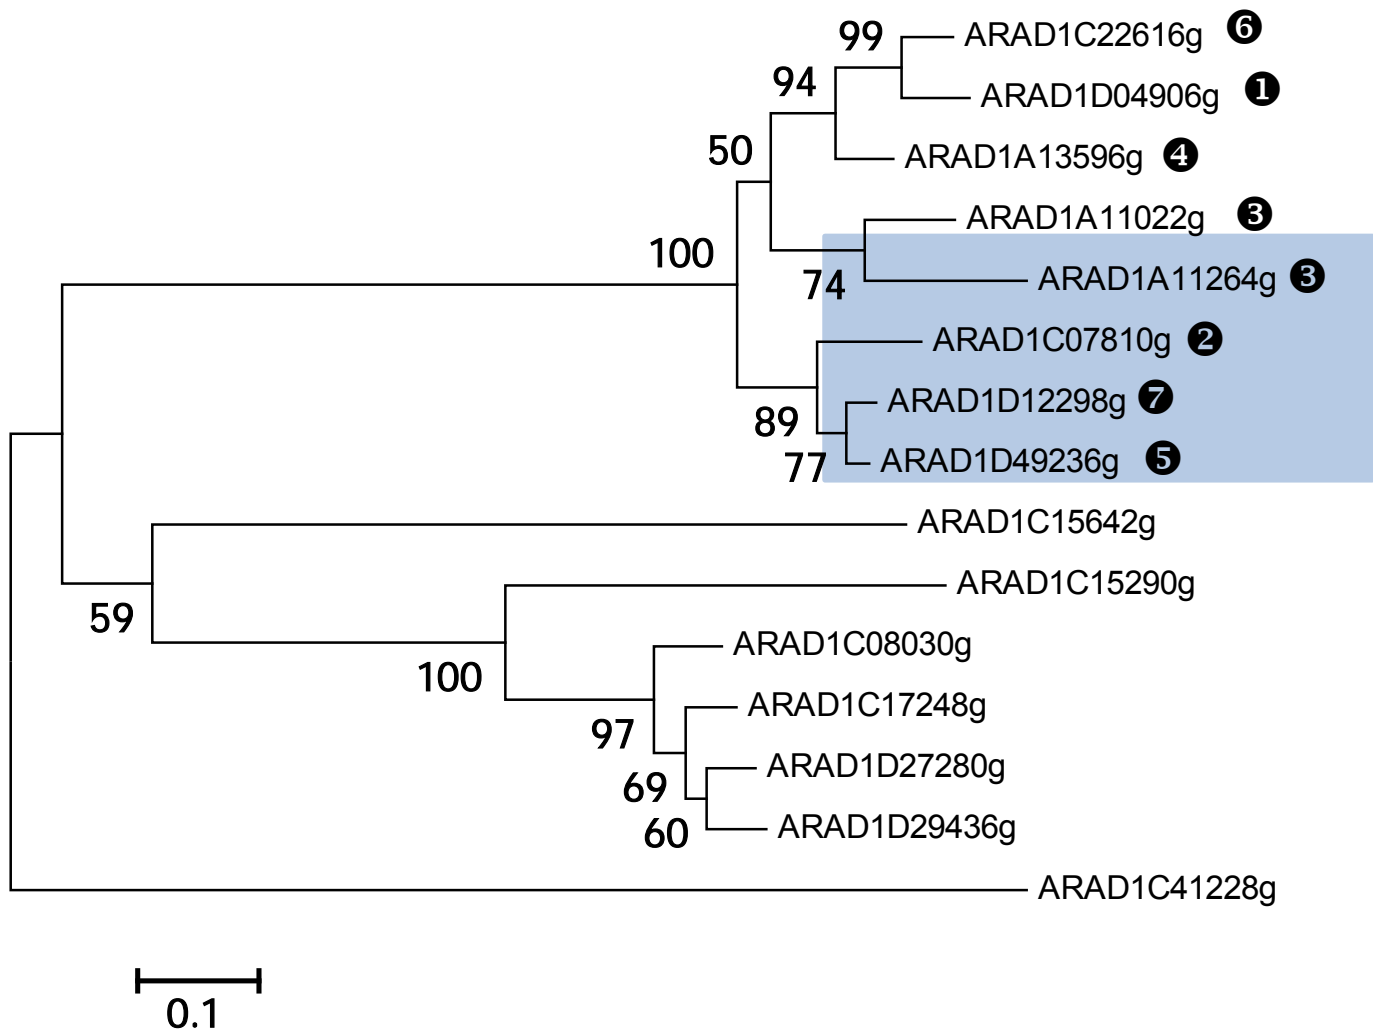

# Figure S11C3 GL3C4702 family

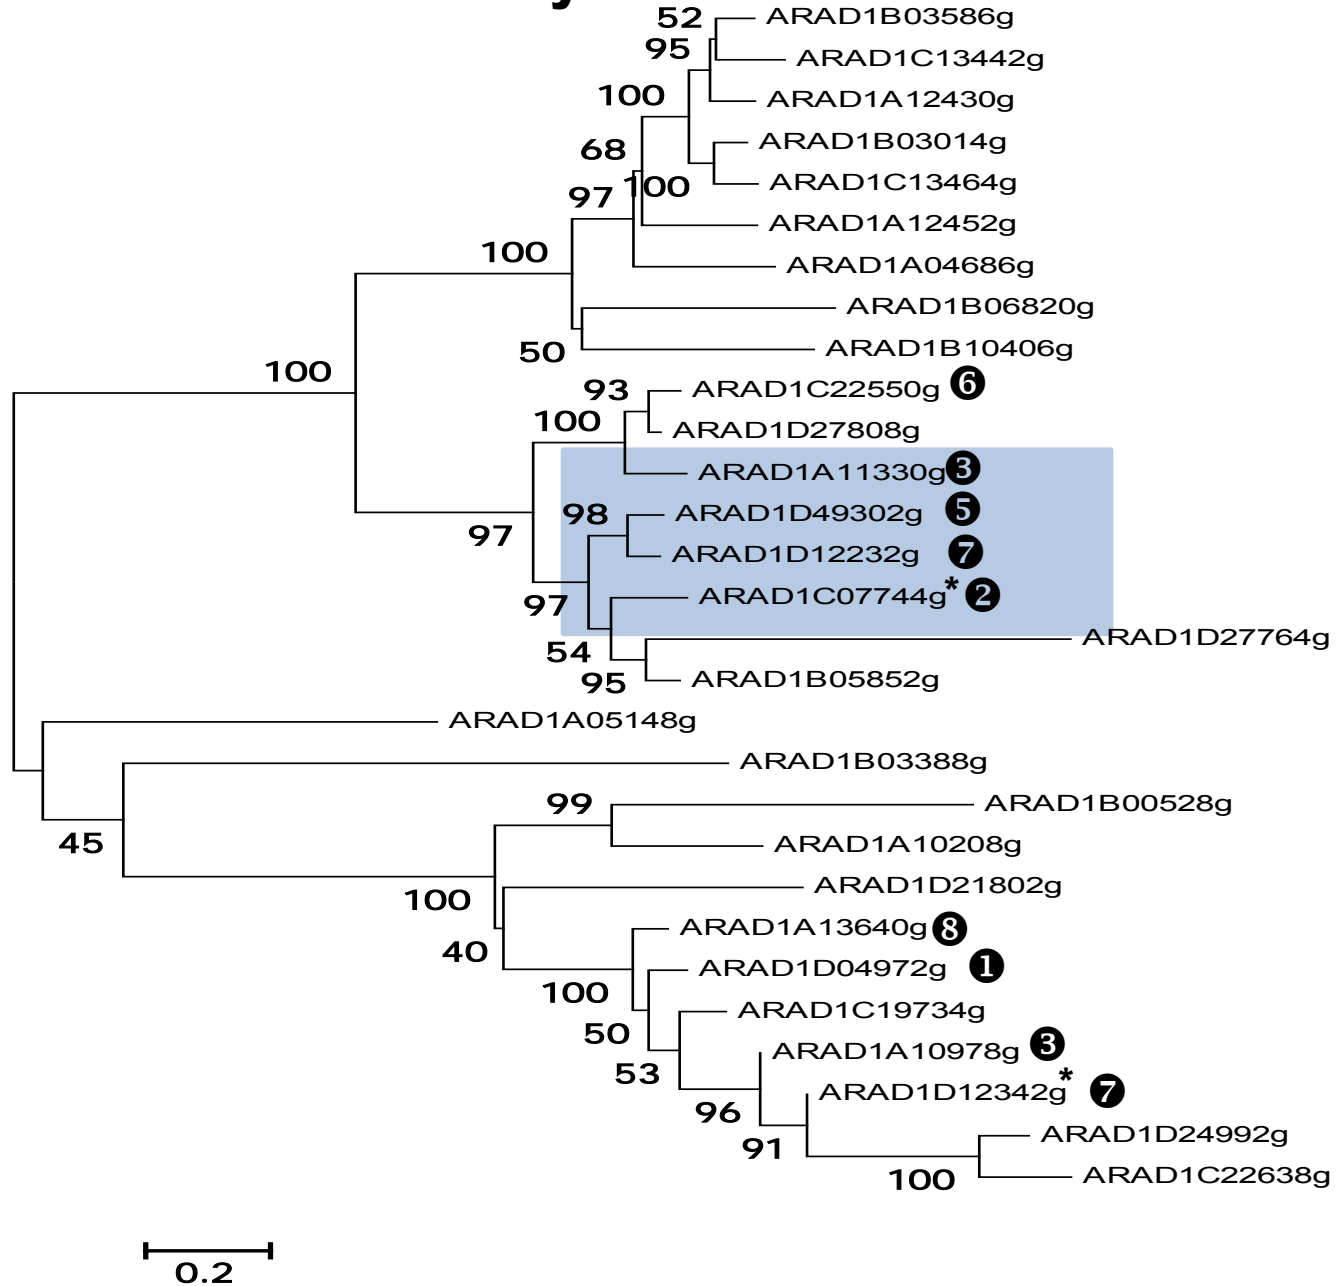

Supplement: 1754-6834-7-66-S11.pdf [file 1754-6834-7-66-S11.pdf]
