# Supplementary material for: The complete genome of Blastobotrys (Arxula) adeninivorans LS3 - a yeast of biotechnological interest
Source: PubMed Central journal article supplement (PMC4022394; doi:10.1186/1754-6834-7-66), 2014-04-24
Supplement: 1754-6834-7-66-S3.pdf [file 1754-6834-7-66-S3.pdf]

## Additional File 3. Non coding RNAs

### Table S3A Codon and tRNA gene usage in *A. adenivorans* and *Y. lipolytica*.

Genes encoding tRNAs were searched with tRNAScan-SE<sup>1</sup> and sequences were analyzed for possible exceptions to the eukaryotic cloverleaf model, as described in<sup>2</sup>. Initiator Met tRNA genes were distinguished from the elongator sequences thanks to the "GGG" sequence in positions 29-31.

### Table S3B Genes encoding snRNAs and snoRNAs.

Blast<sup>3</sup> and Infernal<sup>4</sup> searches were performed on *A. adenivorans* genome for snRNAs and snoRNAs detection. For the Blast search, ncRNA sequences from the Genolevures database<sup>5</sup> were used as queries. All hits with an e-value lower than 0.1 were retained for validation. For the Infernal search, covariance models found in the RFam<sup>6</sup> database were used. All hits with an e-value lower than 0.5 were retained for validation. All retained hits were aligned and manually checked. Hits were accepted as candidates if: i) the sequence agrees with known structural features, guiding sequences (for snoRNAs) and conserved sequence motifs for homologous molecules and ii) known synteny was verified.

**Table S3A Codon and tRNA gene Usages in *A. adenivorans* and *Y. lipolytica***

| AA     | C   | AC    | ARAD    | YALI     | AA    | C         | AC  | ARAD             | YALI     |     |
|--------|-----|-------|---------|----------|-------|-----------|-----|------------------|----------|-----|
| F Phe  | TTT | ---   | 2.14 -  | 1.58 -   | Y Tyr | TAT       | --- | 1.33 -           | 0.68 -   |     |
| F Phe  | TTC | (GAA) | 1.61 4+ | 2.30 17+ | Y Tyr | TAC (GTA) | --- | 1.80 5+          | 2.32 14+ |     |
| L Leu  | TTA | (TAA) | 0.69 1  | 0.18 1   | * Och | TAA       | --- | -                | -        |     |
| L Leu  | TTG | (CAA) | 1.93 2+ | 1.04 3+  | * Amb | TAG       | --- | -                | -        |     |
| L Leu  | CTT | (AAG) | 1.56 4  | 1.33 21+ | H His | CAT       | --- | 1.18 -           | 0.95 -   |     |
| L Leu  | CTC | (GAG) | 1.37 -  | 2.27 -   | H His | CAC (GTG) | --- | 1.09 4           | 1.45 12+ |     |
| L Leu  | CTA | (TAG) | 0.96 1  | 0.53 2   | Q Gln | CAA (TTG) | --- | 1.60 1           | 0.97 3   |     |
| L Leu  | CTG | (CAG) | 2.41 4  | 3.36 13+ | Q Gln | CAG (CTG) | --- | 2.71 4           | 3.22 15+ |     |
| I Ile  | ATT | (AAT) | 3.05 7+ | 2.26 26+ | N Asn | AAT       | --- | 1.86 -           | 0.89 -   |     |
| I Ile  | ATC | (GAT) | 1.61 -  | 2.45 -   | N Asn | AAC (GTT) | --- | 2.19 5           | 3.14 16+ |     |
| I Ile  | ATA | (TAT) | 0.42 1+ | 0.21 1+  | K Lys | AAA (TTT) | --- | 1.46 2+          | 1.24 4+  |     |
| M Met  | ATG | (CAT) | 1.99 3+ | 0.21 9   | K Lys | AAG (CTT) | --- | 4.07 8+          | 4.66 34+ |     |
| m iMet | ATG | (CAT) | 0.21 3  | 2.06 9   | D Asp | GAT       | --- | 2.91 -           | 2.16 -   |     |
| V Val  | GTT | (AAC) | 1.72 5  | 1.59 24  | D Asp | GAC (GTC) | --- | 3.11 6+          | 3.84 28+ |     |
| V Val  | GTC | ---   | 1.46 -  | 2.16 -   | E Glu | GAA (TTC) | --- | 2.80 2+          | 1.87 6   |     |
| V Val  | GTA | (TAC) | 1.28 2  | 0.40 2   | E Glu | GAG (CTC) | --- | 3.52 6           | 4.65 27+ |     |
| V Val  | GTG | (CAC) | 2.23 3+ | 2.57 8+  | C Cys | TGT       | --- | 0.54 -           | 0.60 -   |     |
| S Ser  | TCT | (AGA) | 2.35 5  | 2.19 21  | C Cys | TGC (GCA) | --- | 0.61 2           | 0.61 8   |     |
| S Ser  | TCC | ---   | 1.57 -  | 2.07 -   | * Opa | TGA       | --- | -                | -        |     |
| S Ser  | TCA | (TGA) | 1.31 1+ | 0.78 2+  | W Trp | TGG (CCA) | --- | 1.19 3+          | 1.20 13+ |     |
| S Ser  | TCG | (CGA) | 1.37 2+ | 1.54 4+  | R Arg | CGT (ACG) | --- | 0.86 4+          | 0.60 1   |     |
| P Pro  | CCT | (AGG) | 2.12 5+ | 1.74 21+ | R Arg | CGC       | --- | 0.84 -           | 0.44 -   |     |
| P Pro  | CCC | ---   | 1.34 -  | 2.34 -   | R Arg | CGA (TCG) | --- | 1.74 4+          | 2.19 25  |     |
| P Pro  | CCA | (TGG) | 1.40 2+ | 0.68 3   | R Arg | CGG (CCG) | --- | 0.69 1           | 0.77 -   |     |
| P Pro  | CCG | (CGG) | 0.56 1+ | 0.67 2+  | S Ser | AGT       | --- | 0.97 -           | 0.68 -   |     |
| T Thr  | ACT | (AGT) | 2.19 5  | 1.64 22  | S Ser | AGC (GCT) | --- | 1.06 2+          | 0.99 6+  |     |
| T Thr  | ACC | ---   | 1.77 -  | 2.58 -   | R Arg | AGA (TCT) | --- | 0.91 2           | 0.83 4   |     |
| T Thr  | ACA | (TGT) | 0.95 1+ | 1.05 3+  | R Arg | AGG (CCT) | --- | 0.54 1           | 0.24 1   |     |
| T Thr  | ACG | (CGT) | 0.65 1  | 0.85 2+  | G Gly | GGT       | --- | 1.73 -           | 1.68 -   |     |
| A Ala  | GCT | (AGC) | 2.68 7  | 2.55 30  | G Gly | GGC (GCC) | --- | 1.52 6           | 2.18 30  |     |
| A Ala  | GCC | ---   | 2.32 -  | 3.28 -   | G Gly | GGA (TCC) | --- | 2.47 5           | 2.09 11+ |     |
| A Ala  | GCA | (TGC) | 1.82 2  | 1.11 4   | G Gly | GGG (CCC) | --- | 0.78 1           | 0.43 -   |     |
| A Ala  | GCG | (CGC) | 0.87 1  | 0.89 2   |       |           |     |                  |          |     |
|        |     |       |         |          |       |           |     | Number of tDNA   | 147      | 510 |
|        |     |       |         |          |       |           |     | Nr of anticodons | 46       | 44  |

The first column (AA) indicates the charged amino acid (in one- and three-letter codes), the second one (C) the codon and the third one (AC) the anticodon (between brackets). For each genome, the first value is the codon usage (in % of the 61 sense codons) and the second one the number of tRNA genes (“-” no tRNA gene). The “+” signs denote genes with intron. Data for *Yarrowia lipolytica* are taken from (Dujon et al., 2004).

Contrary to other hemiascomycetes belonging to the *Saccharomyces*, protoplasts and CTG clades (Dujon, 2010), *A. adenivorans* follows the regular eukaryal-type sparing rules to read CTY Leu and CGA Arg codons. *A. adenivorans* displays the complete eukaryotic set of 46 tDNAs (Marck et al., 2006).

Three sequence exceptions are found: 1- in the seven copies of tDNA-Ala (AGC), 5 GU (or mismatched) pairs are found (usually no more than 4 (Marck and Grosjean, 2002)); 2- 3 GU pairs in a row occur in the two copies of tDNA-Cys (GCA); 3- A<sub>18</sub> instead of the conserved G<sub>18</sub> is present in the two copies of tDNA-Pro (TGG) (as in *Y. lipolytica* (Marck et al., 2006)).

The genome of *A. adenivorans* comprises only one type of tandem tDNA, **tDNA-Ile (AAT)-tDNA-His (GTG)**, present in two copies. In both cases the distance separating the two genes (number of nucleotides between base 73 of the first tRNA gene and base 1 of the second gene) is one nucleotide.

///

**Table S3B Genes encoding snRNAs and snoRNAs**

| Locus_tag                  | Coordinates      | Str. Class | Gene          | Annotation                                                |
|----------------------------|------------------|------------|---------------|-----------------------------------------------------------|
| <b>Pol III transcripts</b> |                  |            |               |                                                           |
| ARAD1D16500r               | 1348010..1348345 | c          | RNase_MRP_RNA | RPM1 RNA component of mitochondrial RNase P               |
| ARAD1C16698r               | 1375869..1376141 | c          | RNaseP_RNA    | RPR1 RNA component of nuclear RNase P                     |
| ARAD1D43428r               | 3605025..3605287 |            | SRP_RNA       | SCR1 RNA subunit of the Signal Recognition Particle (SRP) |
| ARAD1C04598r               | 366612..366694   |            | snoRNA        | SNR52-B C/D box small nucleolar RNA, snoU83               |
| ARAD1B19976r               | 1648499..1648609 | c          | snRNA         | SNR6 U6 RNA, U6 spliceosomal RNA                          |
| <b>Pol II transcripts</b>  |                  |            |               |                                                           |
| ARAD1D11726r               | 946178..946328   | c          | snRNA         | SNR19 U1 RNA, U1 spliceosomal RNA                         |
| ARAD1B05148r               | 426576..426766   | c          | snRNA         | SNR20 U2 RNA, U2 spliceosomal RNA                         |
| ARAD1C31152r               | 2599336..2599489 | c          | snRNA         | SNR14 U4 RNA, U4 spliceosomal RNA                         |
| ARAD1C00506r               | 33699..33819     | c          | snRNA         | SNR7 U5 RNA, U5 spliceosomal RNA                          |
| ARAD1A07095r               | 582975..583075   |            | snoRNA        | SNR3 H/ACA box small nucleolar RNA snR3                   |
| ARAD1C38522r               | 3204443..3204601 |            | snoRNA        | SNR5 H/ACA box small nucleolar RNA                        |
| ARAD1A00858r               | 60266..60413     | c          | snoRNA        | SNR8 H/ACA box small nucleolar RNA                        |
| ARAD1B05082r               | 421701..421905   |            | snoRNA        | SNR10 H/ACA box small nucleolar RNA                       |
| ARAD1A17358r               | 1453882..1453978 | c          | snoRNA        | SNR13 C/D box small nucleolar RNA                         |
| ARAD1C25300r               | 2121301..2121664 |            | snoRNA        | SNR17 C/D box small nucleolar RNA, U3a/b RNA              |
| ARAD1D28974r               | 2399197..2399296 |            | snoRNA        | SNR18 C/D box small nucleolar RNA, U18 RNA                |
| ARAD1C26488r               | 2210588..2210668 | c          | snoRNA        | SNR24 C/D box small nucleolar RNA, U24 RNA                |
| ARAD1B04961r               | 412539..412651   |            | snoRNA        | SNR30 H/ACA box small nucleolar RNA snR30                 |
| ARAD1D11792r               | 951021..951172   | c          | snoRNA        | SNR36 H/ACA box small nucleolar RNA                       |
| ARAD1B15411r               | 1267213..1267452 |            | snoRNA        | SNR37 H/ACA box small nucleolar RNA snR37                 |
| ARAD1D45298r               | 3769949..3770032 | c          | snoRNA        | SNR38 C/D box small nucleolar RNA                         |
| ARAD1C40777r               | 3402539..3402587 | c          | snoRNA        | snR40 C/D box small nucleolar RNA snR40                   |
| ARAD1D19382r               | 1589941..1590025 |            | snoRNA        | SNR41 C/D box small nucleolar RNA                         |
| ARAD1C04147r               | 338534..338592   |            | snoRNA        | snR42 H/ACA box small nucleolar RNA snR42                 |
| ARAD1C34232r               | 2848612..2848791 | c          | snoRNA        | SNR43 H/ACA box small nucleolar RNA                       |
| ARAD1C02321r               | 191313..191457   | c          | snoRNA        | SNR44 H/ACA box small nucleolar RNA snR44                 |
| ARAD1D38907r               | 3196551..3196717 | c          | snoRNA        | SNR45 C/D box small nucleolar RNA snR45                   |
| ARAD1B16258r               | 1328173..1328231 |            | snoRNA        | SNR47 C/D box small nucleolar RN                          |
| ARAD1D45254r               | 3768559..3768648 | c          | snoRNA        | SNR48 C/D box small nucleolar RNA                         |
| ARAD1D28270r               | 2339943..2340077 |            | snoRNA        | SNR49 H/ACA box small nucleolar RNA                       |
| ARAD1D19426r               | 1590418..1590507 |            | snoRNA        | SNR51 C/D box small nucleolar RNA                         |
| ARAD1C31790r               | 2649559..2649627 | c          | snoRNA        | SNR53 C/D box small nucleolar RNA                         |
| ARAD1B08470r               | 694966..695048   |            | snoRNA        | SNR54 C/D box small nucleolar RNA                         |
| ARAD1C36322r               | 2993595..2993668 | c          | snoRNA        | SNR55 C/D box small nucleolar RNA                         |
| ARAD1D26774r               | 2217444..2217513 | c          | snoRNA        | SNR56 C/D box small nucleolar RNA                         |
| ARAD1C36344r               | 2993695..2993778 | c          | snoRNA        | SNR57 C/D box small nucleolar RNA                         |
| ARAD1D33726r               | 2790591..2790685 | c          | snoRNA        | SNR60 C/D box small nucleolar RNA                         |
| ARAD1C36300r               | 2993448..2993532 | c          | snoRNA        | SNR61 C/D box small nucleolar RNA                         |
| ARAD1D16478r               | 1347839..1347910 | c          | snoRNA        | SNR66 C/D box small nucleolar RNA                         |
| ARAD1C31812r               | 2649696..2649775 | c          | snoRNA        | SNR67 C/D box small nucleolar RNA                         |
| ARAD1D31922r               | 2634141..2634227 | c          | snoRNA        | SNR69 C/D box small nucleolar RNA                         |
| ARAD1D19404r               | 1590066..1590134 |            | snoRNA        | SNR70 C/D box small nucleolar RNA                         |
| ARAD1A16984r               | 1428737..1428818 |            | snoRNA        | SNR71 C/D box small nucleolar RNA                         |
| ARAD1A04884r               | 398241..398337   |            | snoRNA        | SNR73 C/D box small nucleolar RNA                         |
| ARAD1A04862r               | 398151..398224   |            | snoRNA        | SNR74 C/D box small nucleolar RNA                         |
| ARAD1A04840r               | 397984..398070   |            | snoRNA        | SNR75 C/D box small nucleolar RNA                         |
| ARAD1A04818r               | 397800..397887   |            | snoRNA        | SNR76 C/D box small nucleolar RNA                         |
| ARAD1A04811r               | 397642..397730   |            | snoRNA        | snR77 C/D box small nucleolar RNA snR77                   |
| ARAD1A04796r               | 397500..397574   |            | snoRNA        | SNR78 C/D box small nucleolar RNA                         |
| ARAD1C19844r               | 1635627..1635649 |            | snoRNA        | SNR79 C/D box small nucleolar RNA                         |
| ARAD1C04510r               | 363203..363336   |            | snoRNA        | SNR80 H/ACA box small nucleolar RNA                       |
| ARAD1B02959r               | 243466..243577   |            | snoRNA        | snR87 C/D box small nucleolar RNA snR87                   |
| ARAD1A03300r               | 267696..267803   | c          | snoRNA        | SNR128 C/D box small nucleolar RNA                        |
| ARAD1D38951r               | 3199765..3199908 | c          | snoRNA        | snR161 H/ACA box small nucleolar RNA snR161               |
| ARAD1C08866r               | 711755..711935   | c          | snoRNA        | SNR191 H/ACA box small nucleolar RNA                      |
