# Supplementary material for: The complete genome of Blastobotrys (Arxula) adeninivorans LS3 - a yeast of biotechnological interest
Source: PubMed Central journal article supplement (PMC4022394; doi:10.1186/1754-6834-7-66), 2014-04-24

## **Additional File 5. Functional annotation**

### **Figure S5A Functional classification of *A. adenivorans* ORFs by biological process category.**

Assessments were made through Blat2GO.

### **Figure S5B Best BLAST hits of *A. adenivorans* CDS in other genomes.**

BLASTx alignments of predicted proteins against the NCBI NRPEP database confirm the close relationship of *A. adenivorans* and *Y. lipolytica*.

# Figure S5A Process categories

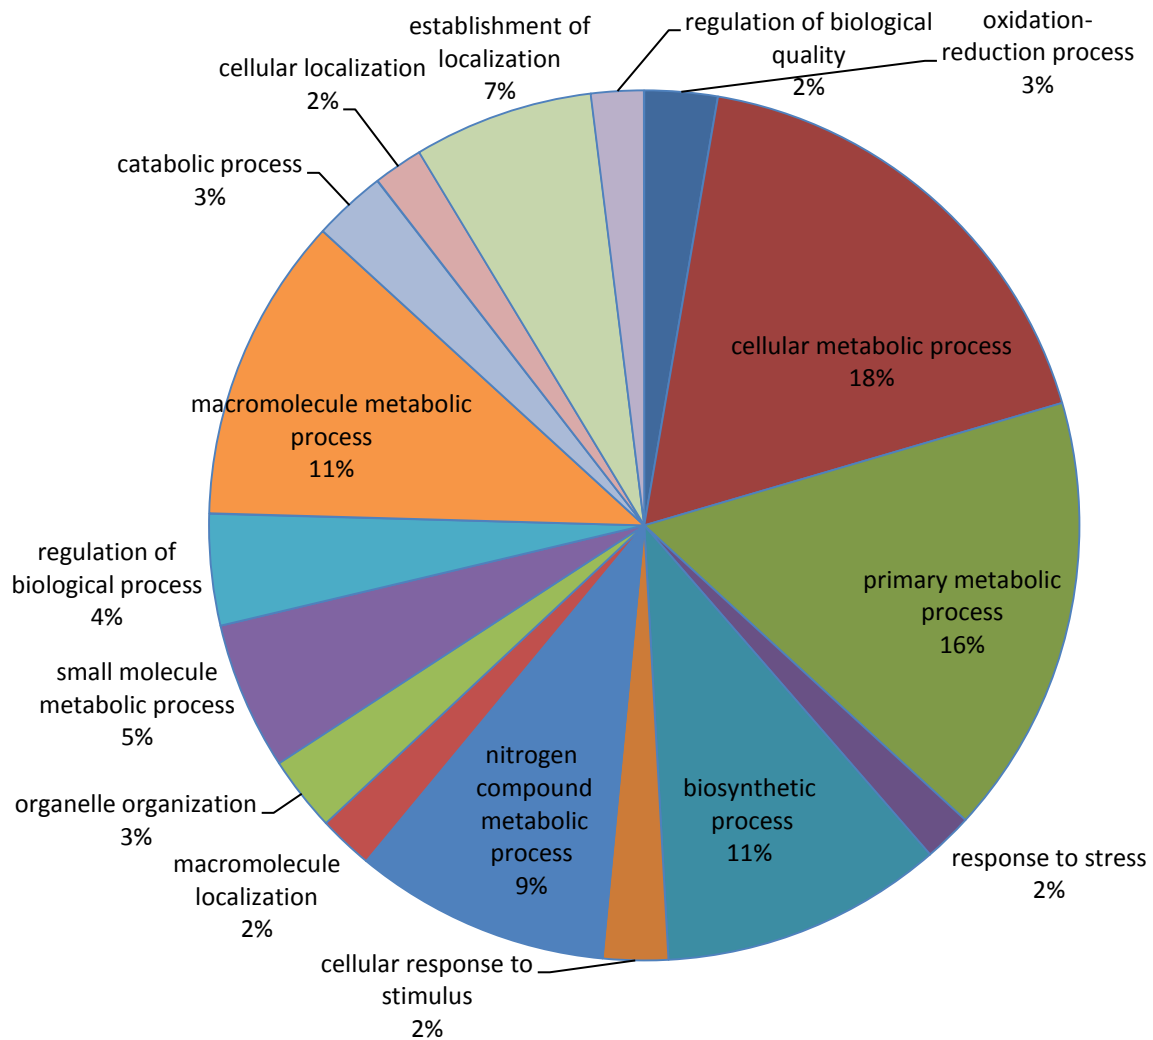

# Figure S5B Best BLASTx hits of *A. adenivorans* CDS in other genomes

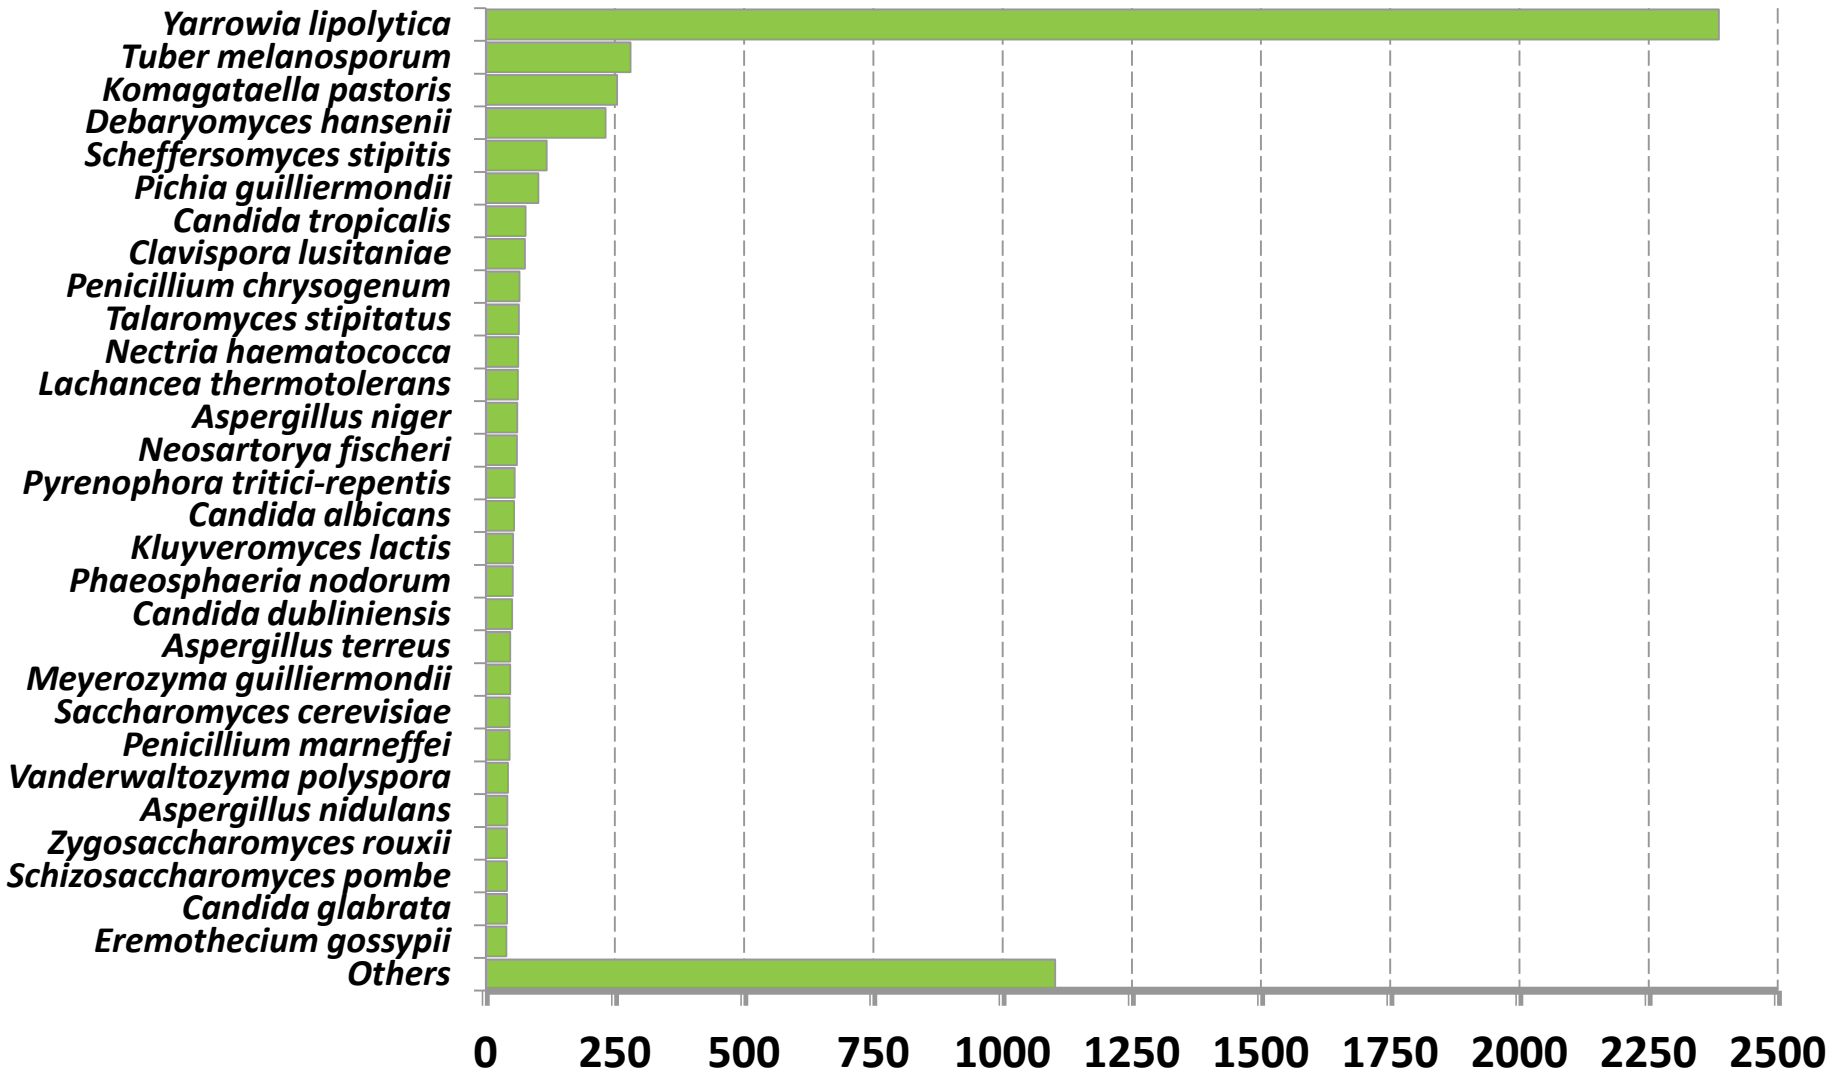

Supplement: 1754-6834-7-66-S5.pdf [file 1754-6834-7-66-S5.pdf]
