# Supplementary material for: The complete genome of Blastobotrys (Arxula) adeninivorans LS3 - a yeast of biotechnological interest
Source: PubMed Central journal article supplement (PMC4022394; doi:10.1186/1754-6834-7-66), 2014-04-24
Supplement: 1754-6834-7-66-S6.pdf [file 1754-6834-7-66-S6.pdf]

## Additional File 6. Spliceosomal introns

### Table S6A Number of introns per gene.

Number of genes containing 1 to 7 introns are listed per chromosome. The comparison with *Y. lipolytica* (YALI) is shown on the right.

### Figure S6B Size distribution.

Intron sizes are indicated on the x-axis (20bp intervals). The number of introns per size class is on the y-axis. Data for *A. adenivorans* (ARAD) are in green, and those for *Y. lipolytica* (YALI) in red. Introns are smaller in ARAD than in YALI, with 82% introns shorter than 80 nucleotides.

## Table S6A Number of introns per gene

|              | number of introns per gene |            |           |           |          |          |
|--------------|----------------------------|------------|-----------|-----------|----------|----------|
|              | 1                          | 2          | 3         | 4         | 5        | 7        |
| Arad1A       | 68                         | 11         | 4         | 1         | 0        | 0        |
| Arad1B       | 84                         | 24         | 1         | 0         | 0        | 0        |
| Arad1C       | 200                        | 44         | 11        | 3         | 2        | 0        |
| Arad1D       | 200                        | 31         | 11        | 7         | 0        | 1        |
| <b>Total</b> | <b>552</b>                 | <b>110</b> | <b>27</b> | <b>11</b> | <b>2</b> | <b>1</b> |

Intron-containing genes  
 $703/6116=11.5\%$  in ARAD  
 $984/6449=15.3\%$  in YALI

Multi-intronic genes  
 $21.5\%$  in ARAD (151/703)  
 $11.5\%$  in YALI (109/951)

## Figure S6B Size distribution

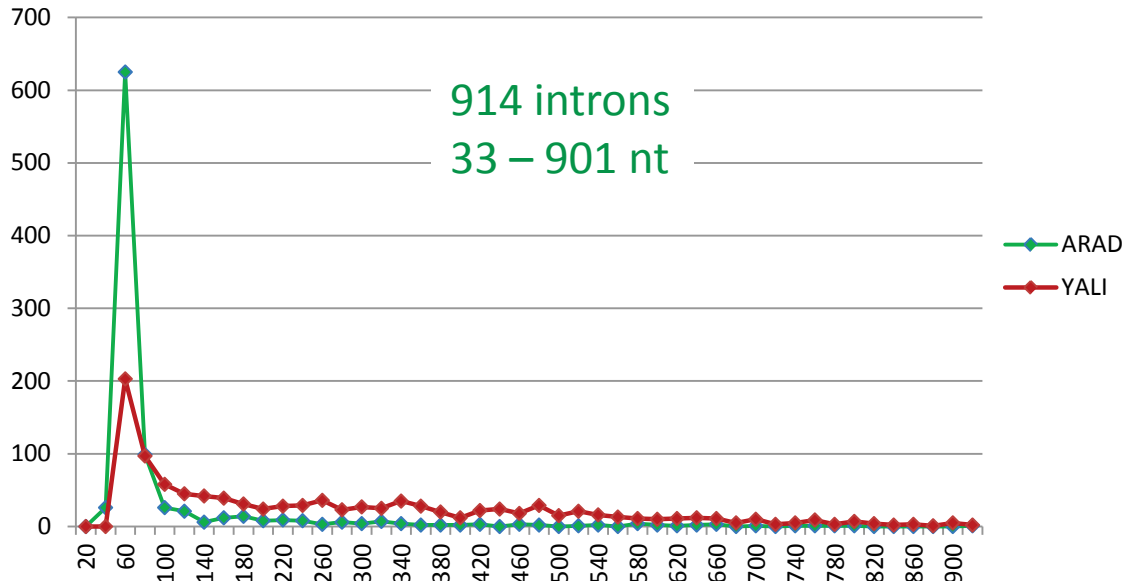

Introns per l-gene  
 $1.30$  in ARAD  
 $1.14$  in YALI

$82\%$  of introns  $\leq 80$  nt  
 $27\%$  in YALI
