# Supplementary material for: The complete genome of Blastobotrys (Arxula) adeninivorans LS3 - a yeast of biotechnological interest
Source: PubMed Central journal article supplement (PMC4022394; doi:10.1186/1754-6834-7-66), 2014-04-24
Supplement: 1754-6834-7-66-S8.pdf [file 1754-6834-7-66-S8.pdf]

## **Additional File 8. List of proteins having homologs only in Pezizomycotina or bacteria**

### **Table S8A List of proteins that only have pezizomycotina species as homologs.**

Abbreviations used are: EMENI= *Emericella nidulans*, GIBZE= *Giberella zae*, PENCH= *Penicillium chrysogenum*, NEUCR= *Neurospora crassa*.

### **Table S8B Putative horizontally transferred genes.**

**Table S8A List of proteins that only have pezizomycotina species as homologs**

| PhylomeDB ID     | ARAD ID      | Homologs in species           |
|------------------|--------------|-------------------------------|
| Phy004C1PR_BLAAD | ARAD1A01540g | EMENI   PENCH                 |
| Phy004C1U1_BLAAD | ARAD1A05082g | GIBZE   EMENI   PENCH   NEUCR |
| Phy004C1UF_BLAAD | ARAD1A05412g | GIBZE   EMENI   PENCH   NEUCR |
| Phy004C1W7_BLAAD | ARAD1A06842g | GIBZE   NEUCR                 |
| Phy004C1ZM_BLAAD | ARAD1A09548g | GIBZE   EMENI   PENCH         |
| Phy004C20M_BLAAD | ARAD1A10373g | GIBZE   EMENI   NEUCR         |
| Phy004C20S_BLAAD | ARAD1A10494g | GIBZE   EMENI   PENCH   NEUCR |
| Phy004C21M_BLAAD | ARAD1A11154g | GIBZE   EMENI                 |
| Phy004C221_BLAAD | ARAD1A11484g | EMENI   PENCH                 |
| Phy004C245_BLAAD | ARAD1A13200g | GIBZE   EMENI   PENCH   NEUCR |
| Phy004C24U_BLAAD | ARAD1A13750g | EMENI                         |
| Phy004C254_BLAAD | ARAD1A13970g | GIBZE   NEUCR   PENCH         |
| Phy004C25X_BLAAD | ARAD1A14630g | GIBZE                         |
| Phy004C26F_BLAAD | ARAD1A15312g | EMENI   PENCH                 |
| Phy004C28D_BLAAD | ARAD1A16896g | GIBZE   EMENI   PENCH   NEUCR |
| Phy004C28Y_BLAAD | ARAD1A17402g | GIBZE   EMENI   PENCH   NEUCR |
| Phy004C28Z_BLAAD | ARAD1A17424g | GIBZE   EMENI   PENCH   NEUCR |
| Phy004C2A7_BLAAD | ARAD1A18392g | GIBZE   PENCH                 |
| Phy004C2C7_BLAAD | ARAD1B00110g | EMENI                         |
| Phy004C2J4_BLAAD | ARAD1B06182g | GIBZE   EMENI   PENCH   NEUCR |
| Phy004C2JY_BLAAD | ARAD1B06842g | GIBZE   EMENI   NEUCR   PENCH |
| Phy004C2JZ_BLAAD | ARAD1B06864g | GIBZE   EMENI   PENCH   NEUCR |
| Phy004C2NE_BLAAD | ARAD1B09636g | GIBZE   EMENI   PENCH   NEUCR |
| Phy004C2O0_BLAAD | ARAD1B10120g | PENCH                         |
| Phy004C2OG_BLAAD | ARAD1B10494g | GIBZE   EMENI                 |
| Phy004C2RQ_BLAAD | ARAD1B13244g | EMENI   PENCH                 |
| Phy004C2SN_BLAAD | ARAD1B14102g | GIBZE   EMENI   NEUCR         |
| Phy004C2T0_BLAAD | ARAD1B14388g | GIBZE   EMENI   PENCH   NEUCR |
| Phy004C2W1_BLAAD | ARAD1B16852g | GIBZE   PENCH                 |
| Phy004C2WP_BLAAD | ARAD1B17402g | EMENI                         |
| Phy004C2X5_BLAAD | ARAD1B17754g | GIBZE   EMENI   PENCH   NEUCR |
| Phy004C2XK_BLAAD | ARAD1B18084g | GIBZE   EMENI   PENCH   NEUCR |
| Phy004C2XS_BLAAD | ARAD1B18260g | EMENI                         |
| Phy004C318_BLAAD | ARAD1B21054g | EMENI                         |
| Phy004C34D_BLAAD | ARAD1B23672g | GIBZE   EMENI   NEUCR   PENCH |
| Phy004C351_BLAAD | ARAD1B24178g | GIBZE   EMENI   PENCH   NEUCR |
| Phy004C35E_BLAAD | ARAD1B24442g | EMENI                         |
| Phy004C35N_BLAAD | ARAD1C00286g | GIBZE   EMENI   PENCH         |
| Phy004C35P_BLAAD | ARAD1C00330g | EMENI   PENCH   NEUCR         |
| Phy004C35V_BLAAD | ARAD1C00462g | GIBZE   EMENI   PENCH   NEUCR |
| Phy004C36R_BLAAD | ARAD1C01232g | GIBZE   EMENI   NEUCR   PENCH |
| Phy004C36T_BLAAD | ARAD1C01276g | EMENI   PENCH                 |
| Phy004C37H_BLAAD | ARAD1C01804g | GIBZE   PENCH                 |
| Phy004C38B_BLAAD | ARAD1C02486g | EMENI   PENCH                 |
| Phy004C394_BLAAD | ARAD1C03124g | GIBZE   NEUCR   PENCH         |
| Phy004C39L_BLAAD | ARAD1C03498g | GIBZE   EMENI   PENCH   NEUCR |
| Phy004C39M_BLAAD | ARAD1C03520g | EMENI   PENCH                 |
| Phy004C3AQ_BLAAD | ARAD1C04422g | GIBZE   EMENI   NEUCR   PENCH |
| Phy004C3BX_BLAAD | ARAD1C05434g | PENCH                         |
| Phy004C3EQ_BLAAD | ARAD1C07722g | PENCH                         |
| Phy004C3HQ_BLAAD | ARAD1C10164g | GIBZE   EMENI                 |
| Phy004C3I2_BLAAD | ARAD1C10406g | PENCH   NEUCR                 |
| Phy004C3IK_BLAAD | ARAD1C10802g | GIBZE   EMENI   PENCH   NEUCR |
| Phy004C3KO_BLAAD | ARAD1C12496g | EMENI   PENCH                 |
| Phy004C3KX_BLAAD | ARAD1C12782g | EMENI   PENCH                 |
| Phy004C3LD_BLAAD | ARAD1C13266g | GIBZE   EMENI   PENCH         |
| Phy004C3M9_BLAAD | ARAD1C13948g | GIBZE   EMENI   PENCH   NEUCR |
| Phy004C3NC_BLAAD | ARAD1C14894g | GIBZE   EMENI   PENCH         |
| Phy004C3OH_BLAAD | ARAD1C15818g | GIBZE   PENCH                 |
| Phy004C3OZ_BLAAD | ARAD1C16214g | EMENI   PENCH                 |
| Phy004C3R0_BLAAD | ARAD1C17996g | GIBZE   EMENI   PENCH   NEUCR |
| Phy004C3RG_BLAAD | ARAD1C18348g | GIBZE   PENCH                 |
| Phy004C3SV_BLAAD | ARAD1C19492g | GIBZE                         |

|                  |              |       |       |       |
|------------------|--------------|-------|-------|-------|
| Phy004C3UM_BLAAD | ARAD1C20900g | GIBZE | EMENI | NEUCR |
| Phy004C3W3_BLAAD | ARAD1C22088g | GIBZE | NEUCR |       |
| Phy004C3W7_BLAAD | ARAD1C22176g | GIBZE | EMENI | PENCH |
| Phy004C3XD_BLAAD | ARAD1C23166g | GIBZE | EMENI | NEUCR |
| Phy004C40X_BLAAD | ARAD1C26092g | GIBZE | EMENI | PENCH |
| Phy004C48R_BLAAD | ARAD1C32560g | GIBZE | EMENI | NEUCR |
| Phy004C4BB_BLAAD | ARAD1C34848g | GIBZE | EMENI | PENCH |
| Phy004C4DE_BLAAD | ARAD1C36608g | EMENI |       |       |
| Phy004C4GG_BLAAD | ARAD1C39050g | GIBZE | PENCH |       |
| Phy004C4GO_BLAAD | ARAD1C39226g | EMENI | NEUCR |       |
| Phy004C4HV_BLAAD | ARAD1C40172g | GIBZE | EMENI | PENCH |
| Phy004C4HZ_BLAAD | ARAD1C40260g | EMENI | PENCH |       |
| Phy004C4IU_BLAAD | ARAD1C40964g | GIBZE | EMENI | PENCH |
| Phy004C4JI_BLAAD | ARAD1C41514g | EMENI | PENCH | NEUCR |
| Phy004C4JO_BLAAD | ARAD1C41668g | GIBZE | PENCH | NEUCR |
| Phy004C4KM_BLAAD | ARAD1C42438g | GIBZE | EMENI | PENCH |
| Phy004C4OL_BLAAD | ARAD1C45694g | EMENI | NEUCR | PENCH |
| Phy004C4OM_BLAAD | ARAD1C45716g | GIBZE | PENCH |       |
| Phy004C4OQ_BLAAD | ARAD1D00132g | EMENI | NEUCR |       |
| Phy004C4P4_BLAAD | ARAD1D00462g | EMENI |       |       |
| Phy004C4QF_BLAAD | ARAD1D01540g | GIBZE | EMENI | NEUCR |
| Phy004C4T1_BLAAD | ARAD1D03652g | PENCH | NEUCR |       |
| Phy004C4V5_BLAAD | ARAD1D05500g | GIBZE | EMENI | NEUCR |
| Phy004C4WD_BLAAD | ARAD1D06512g | EMENI |       |       |
| Phy004C505_BLAAD | ARAD1D09526g | GIBZE | EMENI | PENCH |
| Phy004C53M_BLAAD | ARAD1D12474g | GIBZE | EMENI | NEUCR |
| Phy004C54X_BLAAD | ARAD1D13508g | GIBZE | EMENI | PENCH |
| Phy004C59P_BLAAD | ARAD1D17424g | GIBZE | EMENI | NEUCR |
| Phy004C59W_BLAAD | ARAD1D17578g | GIBZE | NEUCR | PENCH |
| Phy004C5AH_BLAAD | ARAD1D18040g | GIBZE | EMENI | NEUCR |
| Phy004C5AL_BLAAD | ARAD1D18128g | GIBZE | EMENI |       |
| Phy004C5AP_BLAAD | ARAD1D18216g | GIBZE | EMENI | PENCH |
| Phy004C5AR_BLAAD | ARAD1D18260g | GIBZE | EMENI | PENCH |
| Phy004C5AS_BLAAD | ARAD1D18282g | GIBZE | EMENI | PENCH |
| Phy004C5B5_BLAAD | ARAD1D18568g | GIBZE | EMENI | PENCH |
| Phy004C5B9_BLAAD | ARAD1D18656g | GIBZE | EMENI | PENCH |
| Phy004C5CN_BLAAD | ARAD1D19866g | GIBZE | EMENI | NEUCR |
| Phy004C5D5_BLAAD | ARAD1D20262g | GIBZE | EMENI | NEUCR |
| Phy004C5E5_BLAAD | ARAD1D21076g | GIBZE | EMENI | PENCH |
| Phy004C5G9_BLAAD | ARAD1D22924g | GIBZE | EMENI | NEUCR |
| Phy004C5H8_BLAAD | ARAD1D23848g | GIBZE | PENCH |       |
| Phy004C5LM_BLAAD | ARAD1D27632g | GIBZE | EMENI | NEUCR |
| Phy004C5LX_BLAAD | ARAD1D27896g | GIBZE | EMENI | PENCH |
| Phy004C5O0_BLAAD | ARAD1D29678g | GIBZE | NEUCR | PENCH |
| Phy004C5P2_BLAAD | ARAD1D30514g | GIBZE | EMENI | NEUCR |
| Phy004C5Q9_BLAAD | ARAD1D31460g | GIBZE | EMENI | PENCH |
| Phy004C5QV_BLAAD | ARAD1D31966g | GIBZE | EMENI | NEUCR |
| Phy004C5RL_BLAAD | ARAD1D32538g | GIBZE | EMENI | PENCH |
| Phy004C5TC_BLAAD | ARAD1D33968g | EMENI | NEUCR | PENCH |
| Phy004C5TP_BLAAD | ARAD1D34254g | GIBZE | EMENI | NEUCR |
| Phy004C5V0_BLAAD | ARAD1D35310g | GIBZE | EMENI | PENCH |
| Phy004C5VN_BLAAD | ARAD1D35816g | GIBZE | NEUCR | PENCH |
| Phy004C5YO_BLAAD | ARAD1D38214g | GIBZE | EMENI | PENCH |
| Phy004C622_BLAAD | ARAD1D40964g | GIBZE | EMENI | PENCH |
| Phy004C65M_BLAAD | ARAD1D44022g | GIBZE | EMENI | PENCH |
| Phy004C69Z_BLAAD | ARAD1D47564g | GIBZE | EMENI | PENCH |
| Phy004C6CV_BLAAD | ARAD1D50028g | GIBZE | EMENI | PENCH |
| Phy004C6CY_BLAAD | ARAD1D50600g | EMENI | NEUCR | PENCH |
|                  |              | GIBZE | EMENI | PENCH |
|                  |              | NEUCR |       |       |

**Table S8B Putative horizontally transferred genes**

| <i>PhylomeDB ID</i> | <i>Génolevures ID</i> | <i>Closest BLASTp match</i>                                    | <i>UniProt annotation</i>                                                                                    |
|---------------------|-----------------------|----------------------------------------------------------------|--------------------------------------------------------------------------------------------------------------|
| Phy004C1ZK_BLAAD    | ARAD1A09504g          | Emtol_2911 [ <i>Emticicia oligotrophica</i> DSM 17448]         | uniprot I2EWJ1 Uncharacterized, contains a Haem oxygenase-like InterPro domain                               |
| Phy004C266_BLAAD    | ARAD1A15026g          | O3I_025100 [ <i>Nocardia brasiliensis</i> ATCC 700358]         | uniprot K0F6A1 Uncharacterized, similar to Beta-lactamase class C and other penicillin binding proteins      |
| Phy004C2A7_BLAAD    | ARAD1A18392g          | GCN5 [ <i>Spirosoma linguale</i> DSM 74]                       | uniprot D2QRU3 GCN5-related N-acetyltransferase                                                              |
| Phy004C3EQ_BLAAD    | ARAD1C07722g          | Pc06g02220 [ <i>Penicillium chrysogenum</i> Wisconsin 54-1255] | uniprot B6GWC2 Pc06g02220 protein, similar to low molecular weight phosphotyrosine protein phosphatase ArsC* |
| Phy004C6D8_BLAAD    | ARAD1D50842g          | peptidase M24 [ <i>Ajellomyces dermatitidis</i> ATCC 18188]    | uniprot F2T984 Peptidase M24                                                                                 |
| Phy004C6DJ_BLAAD    | ARAD1D51084g          | PFWH6_3129 [ <i>Pseudomonas fluorescens</i> WH6]               | uniprot E2XSY4 Uncharacterized, similar to Sugar phosphate permease **                                       |

\* The same as the one described as transferred in *P. chrysogenum* and some other eurotiomycetes, but not the same found in *Yarrowia lipolytica*, which is absent in *Arxula adenivorans*

\*\* , Also has hits in *P. chrysogenum*, *Ajellomyces dermatitidis* and *Aspergillus nidulans*
