# Supplementary material for: The complete genome of Blastobotrys (Arxula) adeninivorans LS3 - a yeast of biotechnological interest
Source: PubMed Central journal article supplement (PMC4022394; doi:10.1186/1754-6834-7-66), 2014-04-24
Supplement: 1754-6834-7-66-S9.pdf [file 1754-6834-7-66-S9.pdf]

## Additional File 9. Gene families amplified in *A. adenivorans*.

### Figure S9A Duplication rate per gene per branch of the species tree leading to *A. adenivorans*.

Species tree showing the evolution of the species included in the phylome based on a Maximum Likelihood analysis of a concatenated set of widespread genes. Numbers at the lineages leading to *A. adenivorans* represent duplication rates, which indicate the duplication rate per gene per branch found in the phylome. Duplication rates are calculated as number of duplications found at a given node divided by all those trees that are rooted at a deeper node.

### Table S9B Gene families specifically amplified in *A. adenivorans*.

*A. adenivorans* specific expansions were obtained from the phylome, when a node contained exclusively 3 or more sequences of *A. adenivorans*. Overlapping expansions were fused together when more than 20% of their members overlapped. Expansions were annotated using a Blastp search against UniProt.

### Figure S9C Genome Redundancy based on Génolevures families.

Genes of *S. cerevisiae* (SACE), *C. glabrata* (CAGL), *Z. rouxii* (ZYRO), *S. kluyveri* (SAKL), *K. thermotolerans* (KLTH), *K. lactis* (KLLA), *E. gossypii* (ERGO), *D. hansenii* (DEHA), *Millerozyma (Pichia) sorbitophila* (PISO), *A. adenivorans* (ARAD), and *Y. lipolytica* YALI were clustered into 'multigene families' as described in <sup>5</sup>. About 93% of the total proteins (62285/66964) are clustered in 5854 protein families, in which 4745 paralogous gene families (covering more than 85% of the total proteins (57203/66964) and leading to an average of 12 members in each paralogous family). The overall genome redundancy is defined as the number of families containing a set of paralogous gene copies. The degree of redundancy (percentage of proteins in multigene families) represents a more sensitive indicator of the overall genome redundancy. It ranges from 29.2-33.5% (in ERGO, KLLA, KLTH, SAKL, and ZYRO) to 97.3% (in PISO). The degree of redundancy of ARAD (37.3%) is more comparable to those observed for DEHA, YALI, SACE and CAGL (ranging from 37.3 to 40.4%). However, these results contrast with the fact that ARAD has lost a high number of paralogs compared to other hemiascomycetes. Moreover, the degree of redundancy in multigene families is lower than those seen in other eukaryotes such as *Neurospora crassa*, *S. pombe* or *Encephalitozoon cuniculi*. These findings illustrate the importance of gene loss in the ARAD/YALI branch, during the evolution.

The overall genome redundancy of each genome (in square brackets) is defined as the percentage of proteins belonging to protein families over the total number of proteins.

### Table S9D Phyletic patterns of paralogous protein families.

The set of Génolevures paralogous families was analyzed according to the phyletic pattern, with a focus on the YALI/ARAD genomes. ARAD and YALI exhibit the highest sets of families missing in one species [*sczltkdp-y* (missing genes in ARAD) and *sczltkdp-a* (missing genes in YALI)]. We also

noticed the same observation with the pattern *sczltkgdp--* (families missing in both ARAD and YALI) with 135 gene families.

ARAD and YALI exhibit 230 (from 53 paralogous gene families) and 322 (from 93 paralogous gene families) specific proteins (pattern -----a- and -----y, respectively).

### ***Gene contractions/expansions in ARAD and YALI.***

The set of analysed families was restricted to strict paralogous families, *i.e.* without species-specific families and families missing in one species, leading to 3571 strict paralogous families (75.2% of the overall paralogous gene families). The set of universal families (pattern *sczltkgdpay*) is represented by 62.8% (2243/3571) of the strict paralogous families. For those families, we make the hypothesis that for each family, the number of gene along the ARAD/YALI ancestor branch was comprised between  $X_{min}$  and  $X_{max}$ , where  $X_{min}$  is:  $Mean - 1.96 * s / 3$  and  $X_{max}$  is  $Mean + 1.96 * square(s^2)$ . Mean is the average of the number of genes present in the 9 others genomes. 3 is from  $square(9)$ . These parameters take into account the variation of the number of paralogous gene copies in each genome, relative to the size of the family. Genomes which exhibit higher variation compared to the average will therefore be more prone to have been subjected to contraction or expansion during their evolution. Therefore, when the number of genes in ARAD or YALI is lower than  $X_{min}$ , a contraction event is considered and when the number of genes is higher than  $X_{max}$ , an expansion event is considered. Contraction or expansion events in both genomes is considered as an event that occurred in the ARAD/YALI ancestor branch. The results show that in main cases (NN: 64.60% = 2307/3571 of the families), no contraction and no expansion event occurred in the ARAD or YALI branches. 11.73% (CC: 419/3571) and 7.0% (EE: 250/3571) of the protein families exhibit contraction and expansion events in the ancestor branch, respectively. A lower proportion of contraction with an expansion in another genome was also observed: 0.53% (CE) in the case of a contraction event in ARAD with an expansion event in YALI, and 0.28% (EC) in the opposite case. In many cases, the expansion or contraction event appears only in one of the branches. Therefore, within the same family, a contraction event is only observed in ARAD or YALI for 2.80% (CN) or 1.54% (NC) of families, respectively; while an expansion event only occurs in 5.79% (EN) or 5.71% (NE) of the paralogous families, respectively. Overall, a contraction event appears independently 2 times (19 + 100 / 10 + 55) more in ARAD compared to YALI, whereas similar number of expansion events (10 + 207 and 19 + 204) was observed for those two genomes.

### **Figure S9E A 107-member gene family in *A. adenivorans*.**

Alignments were generated with Muscle 3.7<sup>12</sup> and treated with Gblocks<sup>13</sup>. Trees were built with BioNJ<sup>14</sup> and represented with Dendroscope 3<sup>15</sup>. Subfamilies obtained using the Génolevures standards for building gene families (see online Methods) are indicated.

# Figure S9A Duplication rate per gene per branch of the species tree

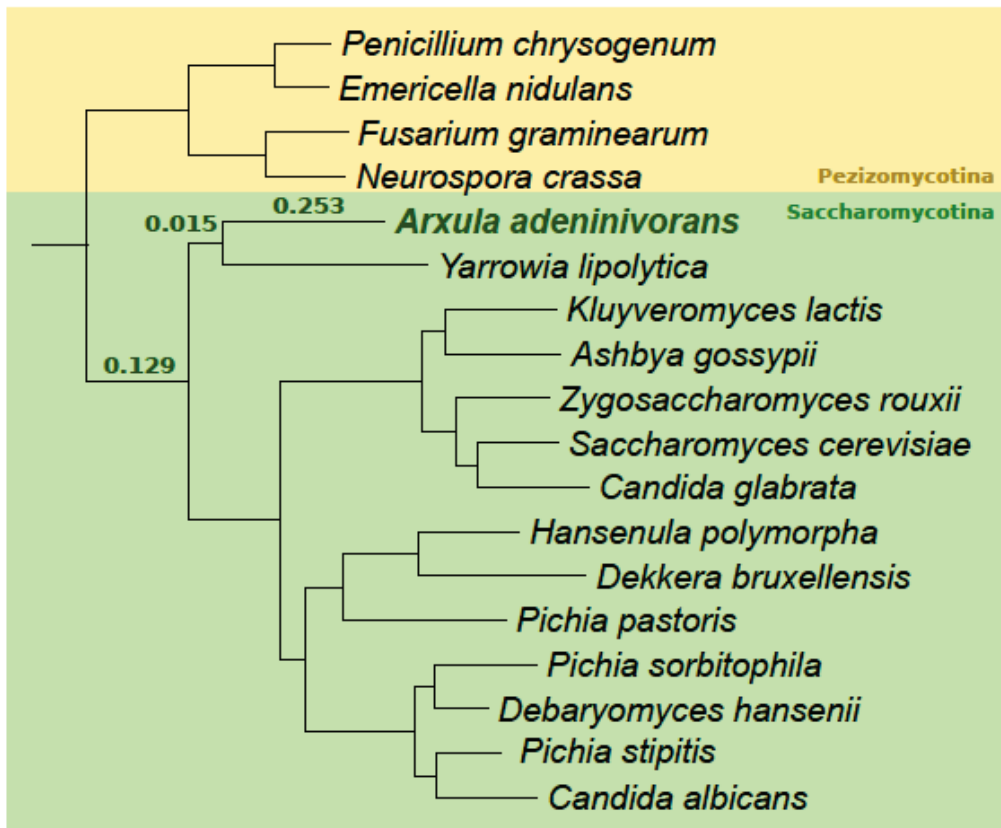

**Table S9B Gene families specifically amplified in 5 "UXYb]bjj cfUbg****Expansion\_0**

|                  |              |                  |              |
|------------------|--------------|------------------|--------------|
| Phy004C1SJ_BLAAD | ARAD1A03740g | Phy004C3O9_BLAAD | ARAD1C15642g |
| Phy004C1TO_BLAAD | ARAD1A04686g | Phy004C3OD_BLAAD | ARAD1C15730g |
| Phy004C20E_BLAAD | ARAD1A10208g | Phy004C3Q6_BLAAD | ARAD1C17248g |
| Phy004C21E_BLAAD | ARAD1A10978g | Phy004C3Q7_BLAAD | ARAD1C17314g |
| Phy004C21F_BLAAD | ARAD1A11000g | Phy004C3Q8_BLAAD | ARAD1C17358g |
| Phy004C21G_BLAAD | ARAD1A11022g | Phy004C3RN_BLAAD | ARAD1C18502g |
| Phy004C21R_BLAAD | ARAD1A11264g | Phy004C3RO_BLAAD | ARAD1C18524g |
| Phy004C21S_BLAAD | ARAD1A11286g | Phy004C3T6_BLAAD | ARAD1C19734g |
| Phy004C21T_BLAAD | ARAD1A11308g | Phy004C3T8_BLAAD | ARAD1C19778g |
| Phy004C21U_BLAAD | ARAD1A11330g | Phy004C3TD_BLAAD | ARAD1C19910g |
| Phy004C21V_BLAAD | ARAD1A11352g | Phy004C3U3_BLAAD | ARAD1C20482g |
| Phy004C237_BLAAD | ARAD1A12430g | Phy004C3UX_BLAAD | ARAD1C21142g |
| Phy004C238_BLAAD | ARAD1A12452g | Phy004C3UY_BLAAD | ARAD1C21164g |
| Phy004C24L_BLAAD | ARAD1A13552g | Phy004C3UZ_BLAAD | ARAD1C21186g |
| Phy004C24M_BLAAD | ARAD1A13574g | Phy004C3WD_BLAAD | ARAD1C22308g |
| Phy004C24N_BLAAD | ARAD1A13596g | Phy004C3WE_BLAAD | ARAD1C22330g |
| Phy004C24O_BLAAD | ARAD1A13618g | Phy004C3WO_BLAAD | ARAD1C22550g |
| Phy004C24P_BLAAD | ARAD1A13640g | Phy004C3WP_BLAAD | ARAD1C22572g |
| Phy004C24Q_BLAAD | ARAD1A13662g | Phy004C3WQ_BLAAD | ARAD1C22616g |
| Phy004C24R_BLAAD | ARAD1A13684g | Phy004C3WR_BLAAD | ARAD1C22638g |
| Phy004C267_BLAAD | ARAD1A15070g | Phy004C4OI_BLAAD | ARAD1C25762g |
| Phy004C2AZ_BLAAD | ARAD1A19008g | Phy004C4OJ_BLAAD | ARAD1C25784g |
| Phy004C2F9_BLAAD | ARAD1B03014g | Phy004C4J5_BLAAD | ARAD1C41228g |
| Phy004C2FA_BLAAD | ARAD1B03036g | Phy004C4OV_BLAAD | ARAD1D00264g |
| Phy004C2FP_BLAAD | ARAD1B03388g | Phy004C4UG_BLAAD | ARAD1D04906g |
| Phy004C2FY_BLAAD | ARAD1B03586g | Phy004C4UH_BLAAD | ARAD1D04950g |
| Phy004C2IP_BLAAD | ARAD1B05830g | Phy004C4UI_BLAAD | ARAD1D04972g |
| Phy004C2IQ_BLAAD | ARAD1B05852g | Phy004C53C_BLAAD | ARAD1D12210g |
| Phy004C2JX_BLAAD | ARAD1B06820g | Phy004C53D_BLAAD | ARAD1D12232g |
| Phy004C2OC_BLAAD | ARAD1B10406g | Phy004C53E_BLAAD | ARAD1D12254g |
| Phy004C2OO_BLAAD | ARAD1B10736g | Phy004C53F_BLAAD | ARAD1D12298g |
| Phy004C2OP_BLAAD | ARAD1B10758g | Phy004C53G_BLAAD | ARAD1D12320g |
| Phy004C2T5_BLAAD | ARAD1B14498g | Phy004C5L9_BLAAD | ARAD1D27280g |
| Phy004C2UK_BLAAD | ARAD1B15620g | Phy004C5LS_BLAAD | ARAD1D27786g |
| Phy004C2Y2_BLAAD | ARAD1B18480g | Phy004C5LT_BLAAD | ARAD1D27808g |
| Phy004C2Y3_BLAAD | ARAD1B18502g | Phy004C5LU_BLAAD | ARAD1D27830g |
| Phy004C3ER_BLAAD | ARAD1C07766g | Phy004C5NQ_BLAAD | ARAD1D29436g |
| Phy004C3ES_BLAAD | ARAD1C07788g | Phy004C5RS_BLAAD | ARAD1D32692g |
| Phy004C3ET_BLAAD | ARAD1C07810g | Phy004C6BX_BLAAD | ARAD1D49192g |
| Phy004C3EU_BLAAD | ARAD1C07832g | Phy004C6BY_BLAAD | ARAD1D49214g |
| Phy004C3EV_BLAAD | ARAD1C07876g | Phy004C6BZ_BLAAD | ARAD1D49236g |
| Phy004C3F2_BLAAD | ARAD1C08030g | Phy004C6C0_BLAAD | ARAD1D49280g |
| Phy004C3LM_BLAAD | ARAD1C13442g | Phy004C6C1_BLAAD | ARAD1D49302g |
| Phy004C3LN_BLAAD | ARAD1C13464g |                  |              |

**Expansion\_1 Probable aspartic-type endopeptidase OPSB | Aspartic proteinase MKC**

|                  |              |                  |              |
|------------------|--------------|------------------|--------------|
| Phy004C2UC_BLAAD | ARAD1B15444g | Phy004C3M4_BLAAD | ARAD1C13838g |
| Phy004C2UV_BLAAD | ARAD1B15884g | Phy004C4VR_BLAAD | ARAD1D06006g |
| Phy004C3M1_BLAAD | ARAD1C13772g | Phy004C57O_BLAAD | ARAD1D15730g |
| Phy004C3M2_BLAAD | ARAD1C13794g | Phy004C69B_BLAAD | ARAD1D47014g |
| Phy004C3M3_BLAAD | ARAD1C13816g |                  |              |

**Expansion\_2**

|                  |              |                  |              |
|------------------|--------------|------------------|--------------|
| Phy004C1YR_BLAAD | ARAD1A08866g | Phy004C5J4_BLAAD | ARAD1D25366g |
| Phy004C214_BLAAD | ARAD1A10758g | Phy004C5J5_BLAAD | ARAD1D25388g |
| Phy004C3KY_BLAAD | ARAD1C12804g | Phy004C5J6_BLAAD | ARAD1D25410g |
| Phy004C3U5_BLAAD | ARAD1C20526g | Phy004C5J7_BLAAD | ARAD1D25432g |
| Phy004C411_BLAAD | ARAD1C26180g | Phy004C5XP_BLAAD | ARAD1D37444g |
| Phy004C4JY_BLAAD | ARAD1C41910g |                  |              |

**Expansion\_3 Candidapepsin**

Phy004C24D\_BLAAD ARAD1A13376g  
 Phy004C27G\_BLAAD ARAD1A16148g  
 Phy004C2ND\_BLAAD ARAD1B09614g  
 Phy004C32C\_BLAAD ARAD1B22000g  
 Phy004C445\_BLAAD ARAD1C28688g

Phy004C4OH\_BLAAD ARAD1C45606g  
 Phy004C4YW\_BLAAD ARAD1D08514g  
 Phy004C4YX\_BLAAD ARAD1D08536g  
 Phy004C55U\_BLAAD ARAD1D14234g  
 Phy004C69J\_BLAAD ARAD1D47190g

**Expansion\_4 NADPH dehydrogenase 1**

Phy004C4M1\_BLAAD ARAD1C43604g  
 Phy004C5EV\_BLAAD ARAD1D21714g  
 Phy004C5EW\_BLAAD ARAD1D21736g  
 Phy004C5FL\_BLAAD ARAD1D22396g  
 Phy004C5FM\_BLAAD ARAD1D22418g  
 Phy004C5FN\_BLAAD ARAD1D22440g  
 Phy004C5FO\_BLAAD ARAD1D22462g  
 Phy004C5FP\_BLAAD ARAD1D22484g

**Expansion\_5**

Phy004C24S\_BLAAD ARAD1A13706g  
 Phy004C2QM\_BLAAD ARAD1B12298g  
 Phy004C2UL\_BLAAD ARAD1B15642g  
 Phy004C3EP\_BLAAD ARAD1C07700g  
 Phy004C3KZ\_BLAAD ARAD1C12870g  
 Phy004C69X\_BLAAD ARAD1D47498g  
 Phy004C6C2\_BLAAD ARAD1D49324g  
 Phy004C6DP\_BLAAD ARAD1D51216g

**Expansion\_6****Putative aryl-alcohol dehydrogenase C977.14c**

Phy004C22T\_BLAAD ARAD1A12100g  
 Phy004C2MW\_BLAAD ARAD1B09240g  
 Phy004C2MX\_BLAAD ARAD1B09262g  
 Phy004C2MY\_BLAAD ARAD1B09284g  
 Phy004C2UD\_BLAAD ARAD1B15466g  
 Phy004C3X3\_BLAAD ARAD1C22946g  
 Phy004C5OZ\_BLAAD ARAD1D30448g

**Expansion\_7 Beta-glucosidase**

Phy004C1WZ\_BLAAD ARAD1A07458g  
 Phy004C2ED\_BLAAD ARAD1B01980g  
 Phy004C2EP\_BLAAD ARAD1B02354g  
 Phy004C2R5\_BLAAD ARAD1B12782g  
 Phy004C482\_BLAAD ARAD1C31966g  
 Phy004C6B0\_BLAAD ARAD1D48422g  
 Phy004C6B1\_BLAAD ARAD1D48444g

**Expansion\_8****AB hydrolase superfamily protein C1039.03**

Phy004C2KA\_BLAAD ARAD1B07106g  
 Phy004C3NT\_BLAAD ARAD1C15268g  
 Phy004C4C2\_BLAAD ARAD1C35442g  
 Phy004C5AT\_BLAAD ARAD1D18304g  
 Phy004C5AU\_BLAAD ARAD1D18326g  
 Phy004C5EN\_BLAAD ARAD1D21538g

**Expansion\_9**

Phy004C2EO\_BLAAD ARAD1B02288g  
 Phy004C2EQ\_BLAAD ARAD1B02464g  
 Phy004C51I\_BLAAD ARAD1D10692g  
 Phy004C5HT\_BLAAD ARAD1D24310g  
 Phy004C642\_BLAAD ARAD1D42746g  
 Phy004C672\_BLAAD ARAD1D45166g

**Expansion\_10**

Phy004C1PG\_BLAAD ARAD1A01298g  
 Phy004C1PI\_BLAAD ARAD1A01342g  
 Phy004C1PJ\_BLAAD ARAD1A01364g  
 Phy004C2BN\_BLAAD ARAD1A19536g  
 Phy004C2XG\_BLAAD ARAD1B18018g  
 Phy004C368\_BLAAD ARAD1C00770g

**Expansion\_11****NmrA-like family domain-containing protein 1**

Phy004C2DL\_BLAAD ARAD1B01276g  
 Phy004C3FS\_BLAAD ARAD1C08602g  
 Phy004C4VX\_BLAAD ARAD1D06160g  
 Phy004C4ZC\_BLAAD ARAD1D08866g  
 Phy004C5RV\_BLAAD ARAD1D32758g  
 Phy004C626\_BLAAD ARAD1D41052g

**Expansion\_12 MFS-type transporter**

Phy004C2BZ\_BLAAD ARAD1A19800g  
 Phy004C2E0\_BLAAD ARAD1B01628g  
 Phy004C3Q9\_BLAAD ARAD1C17402g  
 Phy004C5B3\_BLAAD ARAD1D18524g  
 Phy004C5B4\_BLAAD ARAD1D18546g  
 Phy004C5FC\_BLAAD ARAD1D22176g

**Expansion\_13****Uncharacterized oxidoreductase C736.13**

Phy004C3QP\_BLAAD ARAD1C17754g  
 Phy004C3SL\_BLAAD ARAD1C19272g  
 Phy004C4H8\_BLAAD ARAD1C39666g  
 Phy004C4TP\_BLAAD ARAD1D04246g

**Expansion\_14****Cutinase transcription factor 1 alpha**

Phy004C263\_BLAAD ARAD1A14894g  
 Phy004C40W\_BLAAD ARAD1C26070g  
 Phy004C5B9\_BLAAD ARAD1D18656g  
 Phy004C5NZ\_BLAAD ARAD1D29656g

**Expansion\_15 High-affinity glucose transporter**

Phy004C26D\_BLAAD ARAD1A15246g  
 Phy004C2QT\_BLAAD ARAD1B12496g  
 Phy004C2QU\_BLAAD ARAD1B12518g  
 Phy004C513\_BLAAD ARAD1D10362g

**Expansion\_16 ATP-dependent DNA helicase Q1**

|                  |              |
|------------------|--------------|
| Phy004C100_BLAAD | ARAD1A00110g |
| Phy004C24U_BLAAD | ARAD1A13750g |
| Phy004C35D_BLAAD | ARAD1B24420g |
| Phy004C35E_BLAAD | ARAD1B24442g |
| Phy004C6BW_BLAAD | ARAD1D49170g |
| Phy004C6DV_BLAAD | ARAD1D51348g |

**Expansion\_17****Glycoprotein-N-acetylgalactosamine 3-beta-galactosyltransferase 1-A**

|                  |              |
|------------------|--------------|
| Phy004C5C9_BLAAD | ARAD1D19558g |
| Phy004C5DM_BLAAD | ARAD1D20636g |
| Phy004C695_BLAAD | ARAD1D46860g |
| Phy004C696_BLAAD | ARAD1D46882g |

**Expansion\_18 NADPH-dependent methylglyoxal reductase GRE2 | Putative uncharacterized oxidoreductase YGL039W | NADPH-dependent aldehyde reductase ARI1**

|                  |              |
|------------------|--------------|
| Phy004C21O_BLAAD | ARAD1A11198g |
| Phy004C2F2_BLAAD | ARAD1B02860g |

|                  |              |
|------------------|--------------|
| Phy004C2GM_BLAAD | ARAD1B04136g |
| Phy004C3T7_BLAAD | ARAD1C19756g |

**Expansion\_19 Beta-glucosidase 2**

|                  |              |
|------------------|--------------|
| Phy004C26J_BLAAD | ARAD1A15422g |
| Phy004C466_BLAAD | ARAD1C30404g |
| Phy004C46E_BLAAD | ARAD1C30558g |
| Phy004C560_BLAAD | ARAD1D14366g |

**Expansion\_20 Sugar transporter STL1**

|                  |              |
|------------------|--------------|
| Phy004C1W3_BLAAD | ARAD1A06754g |
| Phy004C25A_BLAAD | ARAD1A14102g |
| Phy004C5B8_BLAAD | ARAD1D18634g |
| Phy004C5NY_BLAAD | ARAD1D29634g |

**Expansion\_21**

|                  |              |
|------------------|--------------|
| Phy004C29T_BLAAD | ARAD1A18084g |
| Phy004C4BB_BLAAD | ARAD1C34848g |
| Phy004C583_BLAAD | ARAD1D16060g |
| Phy004C5JE_BLAAD | ARAD1D25586g |

**Expansion\_22 NADPH-dependent 1-acyldihydroxyacetone phosphate reductase**

|                  |              |
|------------------|--------------|
| Phy004C2BB_BLAAD | ARAD1A19272g |
| Phy004C41N_BLAAD | ARAD1C26686g |
| Phy004C41O_BLAAD | ARAD1C26708g |
| Phy004C5ZP_BLAAD | ARAD1D39072g |

**Expansion\_23 Probable ferric reductase transmembrane component**

|                  |              |
|------------------|--------------|
| Phy004C107_BLAAD | ARAD1A00264g |
| Phy004C108_BLAAD | ARAD1A00286g |
| Phy004C5K1_BLAAD | ARAD1D26136g |
| Phy004C5YH_BLAAD | ARAD1D38060g |

**Expansion\_24 Lipase**

|                  |              |
|------------------|--------------|
| Phy004C2MB_BLAAD | ARAD1B08712g |
| Phy004C507_BLAAD | ARAD1D09636g |
| Phy004C56J_BLAAD | ARAD1D14784g |
| Phy004C5NW_BLAAD | ARAD1D29590g |

**Expansion\_25 Cytochrome P450 52E1**

|                  |              |
|------------------|--------------|
| Phy004C4WS_BLAAD | ARAD1D06842g |
| Phy004C65A_BLAAD | ARAD1D43758g |
| Phy004C65B_BLAAD | ARAD1D43780g |
| Phy004C67L_BLAAD | ARAD1D45628g |

**Expansion\_26 UPF0420 protein**

|                  |              |
|------------------|--------------|
| Phy004C2IN_BLAAD | ARAD1B05786g |
| Phy004C2TG_BLAAD | ARAD1B14740g |
| Phy004C3US_BLAAD | ARAD1C21032g |
| Phy004C47S_BLAAD | ARAD1C31702g |

**Expansion\_27**

|                  |              |
|------------------|--------------|
| Phy004C4QH_BLAAD | ARAD1D01584g |
| Phy004C4QL_BLAAD | ARAD1D01672g |
| Phy004C4QM_BLAAD | ARAD1D01694g |
| Phy004C58O_BLAAD | ARAD1D16566g |

**Expansion\_28****Heat shock protein 42 | Heat shock protein 16**

|                  |              |
|------------------|--------------|
| Phy004C1W2_BLAAD | ARAD1A06732g |
| Phy004C4AZ_BLAAD | ARAD1C34584g |
| Phy004C4O2_BLAAD | ARAD1C45276g |
| Phy004C53A_BLAAD | ARAD1D12166g |

**Expansion\_29 Glutathione S-transferase**

|                  |              |
|------------------|--------------|
| Phy004C3SV_BLAAD | ARAD1C19492g |
| Phy004C5Z7_BLAAD | ARAD1D38676g |
| Phy004C6BN_BLAAD | ARAD1D48972g |

**Expansion\_30 Ammonia transport outward protein 2 | Meiotically up-regulated gene 86 protein | Accumulation of dyads protein 2**

|                  |              |
|------------------|--------------|
| Phy004C1PC_BLAAD | ARAD1A01188g |
| Phy004C28S_BLAAD | ARAD1A17248g |
| Phy004C657_BLAAD | ARAD1D43692g |

**Expansion\_31 Polyamine transporter 1**

|                  |              |
|------------------|--------------|
| Phy004C48O_BLAAD | ARAD1C32472g |
| Phy004C4PW_BLAAD | ARAD1D01100g |
| Phy004C4RY_BLAAD | ARAD1D02772g |

**Expansion\_32**

|                  |              |
|------------------|--------------|
| Phy004C2HQ_BLAAD | ARAD1B05038g |
| Phy004C2HR_BLAAD | ARAD1B05060g |
| Phy004C37N_BLAAD | ARAD1C01936g |
| Phy004C3GG_BLAAD | ARAD1C09152g |

**Expansion\_33****Long-chain-fatty-acid--CoA ligase 2**

Phy004C1QA\_BLAAD ARAD1A01936g  
 Phy004C1ZW\_BLAAD ARAD1A09768g  
 Phy004C3MC\_BLAAD ARAD1C14014g

**Expansion\_35****Corticosteroid-binding protein | Polyamine oxidase****FMS1**

Phy004C564\_BLAAD ARAD1D14454g  
 Phy004C5E8\_BLAAD ARAD1D21142g  
 Phy004C6AH\_BLAAD ARAD1D47982g

**Expansion\_37****3-oxoacyl-[acyl-carrier-protein] reductase**

Phy004C1ZR\_BLAAD ARAD1A09658g  
 Phy004C4IJ\_BLAAD ARAD1C40722g  
 Phy004C4NE\_BLAAD ARAD1C44704g

**Expansion\_39 Sorbose reductase SOU1**

Phy004C34K\_BLAAD ARAD1B23848g  
 Phy004C5BM\_BLAAD ARAD1D18942g  
 Phy004C5KT\_BLAAD ARAD1D26862g

**Expansion\_41 Protein SNQ2**

Phy004C231\_BLAAD ARAD1A12298g  
 Phy004C316\_BLAAD ARAD1B20988g  
 Phy004C5DQ\_BLAAD ARAD1D20724g

**Expansion\_43 GABA-specific permease**

Phy004C30V\_BLAAD ARAD1B20746g  
 Phy004C3JT\_BLAAD ARAD1C11814g  
 Phy004C4TQ\_BLAAD ARAD1D04268g

**Expansion\_45 Quinic acid utilization activator**

Phy004C35O\_BLAAD ARAD1C00308g  
 Phy004C4T3\_BLAAD ARAD1D03696g  
 Phy004C5AY\_BLAAD ARAD1D18414g

**Expansion\_47 Probable phosphomutase PMU1**

Phy004C30F\_BLAAD ARAD1B20372g  
 Phy004C321\_BLAAD ARAD1B21736g  
 Phy004C5W3\_BLAAD ARAD1D36168g

**Expansion\_49 Probable cutinase 1**

Phy004C2JY\_BLAAD ARAD1B06842g  
 Phy004C2JZ\_BLAAD ARAD1B06864g  
 Phy004C3R0\_BLAAD ARAD1C17996g

**Expansion\_51**

Phy004C392\_BLAAD ARAD1C03080g  
 Phy004C3H9\_BLAAD ARAD1C09790g  
 Phy004C417\_BLAAD ARAD1C26312g

**Expansion\_53 3-phytase B**

Phy004C209\_BLAAD ARAD1A10054g  
 Phy004C2I2\_BLAAD ARAD1B05324g  
 Phy004C4VM\_BLAAD ARAD1D05896g

**Expansion\_34****Uncharacterized MFS-type transporter C947.06c**

Phy004C3GR\_BLAAD ARAD1C09394g  
 Phy004C4DN\_BLAAD ARAD1C36806g  
 Phy004C4EQ\_BLAAD ARAD1C37686g

**Expansion\_36 Oligopeptide transporter 2**

Phy004C2DX\_BLAAD ARAD1B01540g  
 Phy004C2T8\_BLAAD ARAD1B14564g  
 Phy004C3IP\_BLAAD ARAD1C10934g

**Expansion\_38****Uncharacterized MFS-type transporter PB1E7.08c**

Phy004C4C6\_BLAAD ARAD1C35530g  
 Phy004C4S5\_BLAAD ARAD1D02948g  
 Phy004C6DB\_BLAAD ARAD1D50908

**Expansion\_40****Peptidase M20 domain-containing protein 2**

Phy004C2QB\_BLAAD ARAD1B12056g  
 Phy004C4AF\_BLAAD ARAD1C33968g  
 Phy004C65K\_BLAAD ARAD1D43978g

**Expansion\_42 Uncharacterized oxidoreductase yrbE**

Phy004C259\_BLAAD ARAD1A14080g  
 Phy004C5B6\_BLAAD ARAD1D18590g  
 Phy004C5NV\_BLAAD ARAD1D29568g

**Expansion\_44 Lipase 4**

Phy004C2IM\_BLAAD ARAD1B05764g  
 Phy004C4AV\_BLAAD ARAD1C34496g  
 Phy004C638\_BLAAD ARAD1D41954g

**Expansion\_46**

Phy004C20F\_BLAAD ARAD1A10230g  
 Phy004C2MI\_BLAAD ARAD1B08932g  
 Phy004C68I\_BLAAD ARAD1D46354g

**Expansion\_48****Carboxylic acid transporter protein homolog**

Phy004C3F1\_BLAAD ARAD1C08008g  
 Phy004C55R\_BLAAD ARAD1D14168g  
 Phy004C69U\_BLAAD ARAD1D47432g

**Expansion\_50 Maltose permease MAL31**

Phy004C35M\_BLAAD ARAD1C00264g  
 Phy004C4OP\_BLAAD ARAD1C45782g  
 Phy004C5AK\_BLAAD ARAD1D18106g

**Expansion\_52**

Phy004C2E2\_BLAAD ARAD1B01694g  
 Phy004C2Z9\_BLAAD ARAD1B19426g  
 Phy004C2ZA\_BLAAD ARAD1B19448g

**Expansion\_54 Glycolipid 2-alpha-mannosyltransferase**

Phy004C2DZ\_BLAAD ARAD1B01606g  
 Phy004C3SM\_BLAAD ARAD1C19294g  
 Phy004C605\_BLAAD ARAD1D39424g

**Expansion\_55 Zinc-type alcohol  
dehydrogenase-like protein C1773.06c**

Phy004C216\_BLAAD ARAD1A10802g  
Phy004C3OG\_BLAAD ARAD1C15796g  
Phy004C5K2\_BLAAD ARAD1D26158g

**Expansion\_57 Sterol uptake control protein 2**

Phy004C25X\_BLAAD ARAD1A14630g  
Phy004C2WP\_BLAAD ARAD1B17402g  
Phy004C5AM\_BLAAD ARAD1D18150g

**Expansion\_59**

Phy004C1O1\_BLAAD ARAD1A00132g  
Phy004C1O6\_BLAAD ARAD1A00242g  
Phy004C2CB\_BLAAD ARAD1B00198g

**Expansion\_61**

Phy004C2RA\_BLAAD ARAD1B12892g  
Phy004C2ZO\_BLAAD ARAD1B19756g  
Phy004C68P\_BLAAD ARAD1D46508g

**Expansion\_56 Aldehyde dehydrogenase**

Phy004C2GC\_BLAAD ARAD1B03916g  
Phy004C2GD\_BLAAD ARAD1B03938g  
Phy004C6DE\_BLAAD ARAD1D50974g

**Expansion\_58 Nitrate transporter**

Phy004C3SI\_BLAAD ARAD1C19206g  
Phy004C3SK\_BLAAD ARAD1C19250g  
Phy004C42U\_BLAAD ARAD1C27632g

**Expansion\_60 Maltose permease MAL31**

Phy004C1ZV\_BLAAD ARAD1A09746g  
Phy004C508\_BLAAD ARAD1D09658g  
Phy004C5VJ\_BLAAD ARAD1D35728g



**Figure S9C**

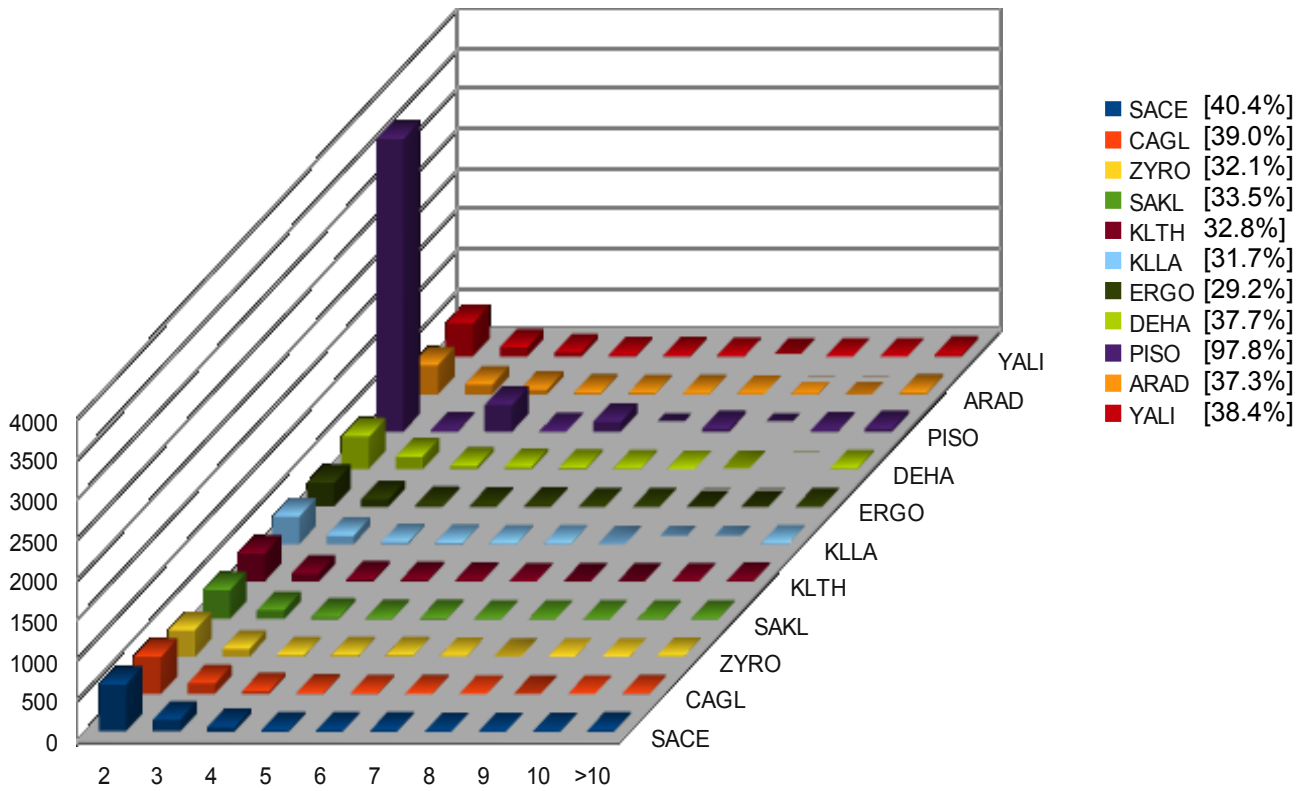

**Table S9D Phyletic patterns of yeast paralogous protein families**

|                                            | ##Families | ## proteins |
|--------------------------------------------|------------|-------------|
| <b>Families universal to all</b>           |            |             |
| sczltkgdpay                                | 2243       | 39756       |
| <b>Families missing in one species</b>     |            |             |
| -czltkgdpay                                | 7          | 7           |
| s-zltkgdpay                                | 20         | 21          |
| sc-ltkgdpay                                | 12         | 12          |
| scz-tkgdpay                                | 8          | 8           |
| sczl-kgdpay                                | 9          | 9           |
| sczlt-gdpay                                | 24         | 24          |
| sczltk-dpay                                | 54         | 58          |
| sczltk-g-pay                               | 28         | 28          |
| sczltk-gd-ay                               | 11         | 11          |
| sczltk-gd-p-y                              | 262        | 263         |
| sczltk-gd-p-a-                             | 101        | 102         |
| <b>Families missing in 2 species (a)</b>   |            |             |
| sczltk-gd-p--                              | 135        | 136         |
| sczltk-gd--y                               | 15         | 15          |
| --zltkgdpay                                | 10         | 10          |
| s-zltk-dpay                                | 9          | 9           |
| s-zlt-gdpay                                | 9          | 9           |
| sczltk-g-pa-                               | 9          | 9           |
| <b>Species-specific families</b>           |            |             |
| s-----                                     | 42         | 158         |
| -c-----                                    | 5          | 37          |
| --z-----                                   | 7          | 44          |
| ---l-----                                  | 7          | 22          |
| ----t-----                                 | 5          | 13          |
| -----k-----                                | 9          | 31          |
| -----g-----                                | 3          | 7           |
| -----d---                                  | 42         | 181         |
| -----p--                                   | 372        | 760         |
| -----a-                                    | 53         | 230         |
| -----y                                     | 93         | 322         |
| <b>Families restricted to 2 species(b)</b> |            |             |
| -----dp--                                  | 358        | 1109        |
| -----pa-                                   | 68         | 226         |
| -----ay                                    | 18         | 81          |
| -----d-a-                                  | 7          | 33          |
| -----p-y                                   | 6          | 20          |
| <b>Other families</b>                      |            |             |
| all other combinations patterns            | 599        | 4661        |

(a) only the six best pattern families are reported, (b) only the 5 best pattern families are reported.

**Figure S9E**

**GL3C4702**

**GL3C4704**

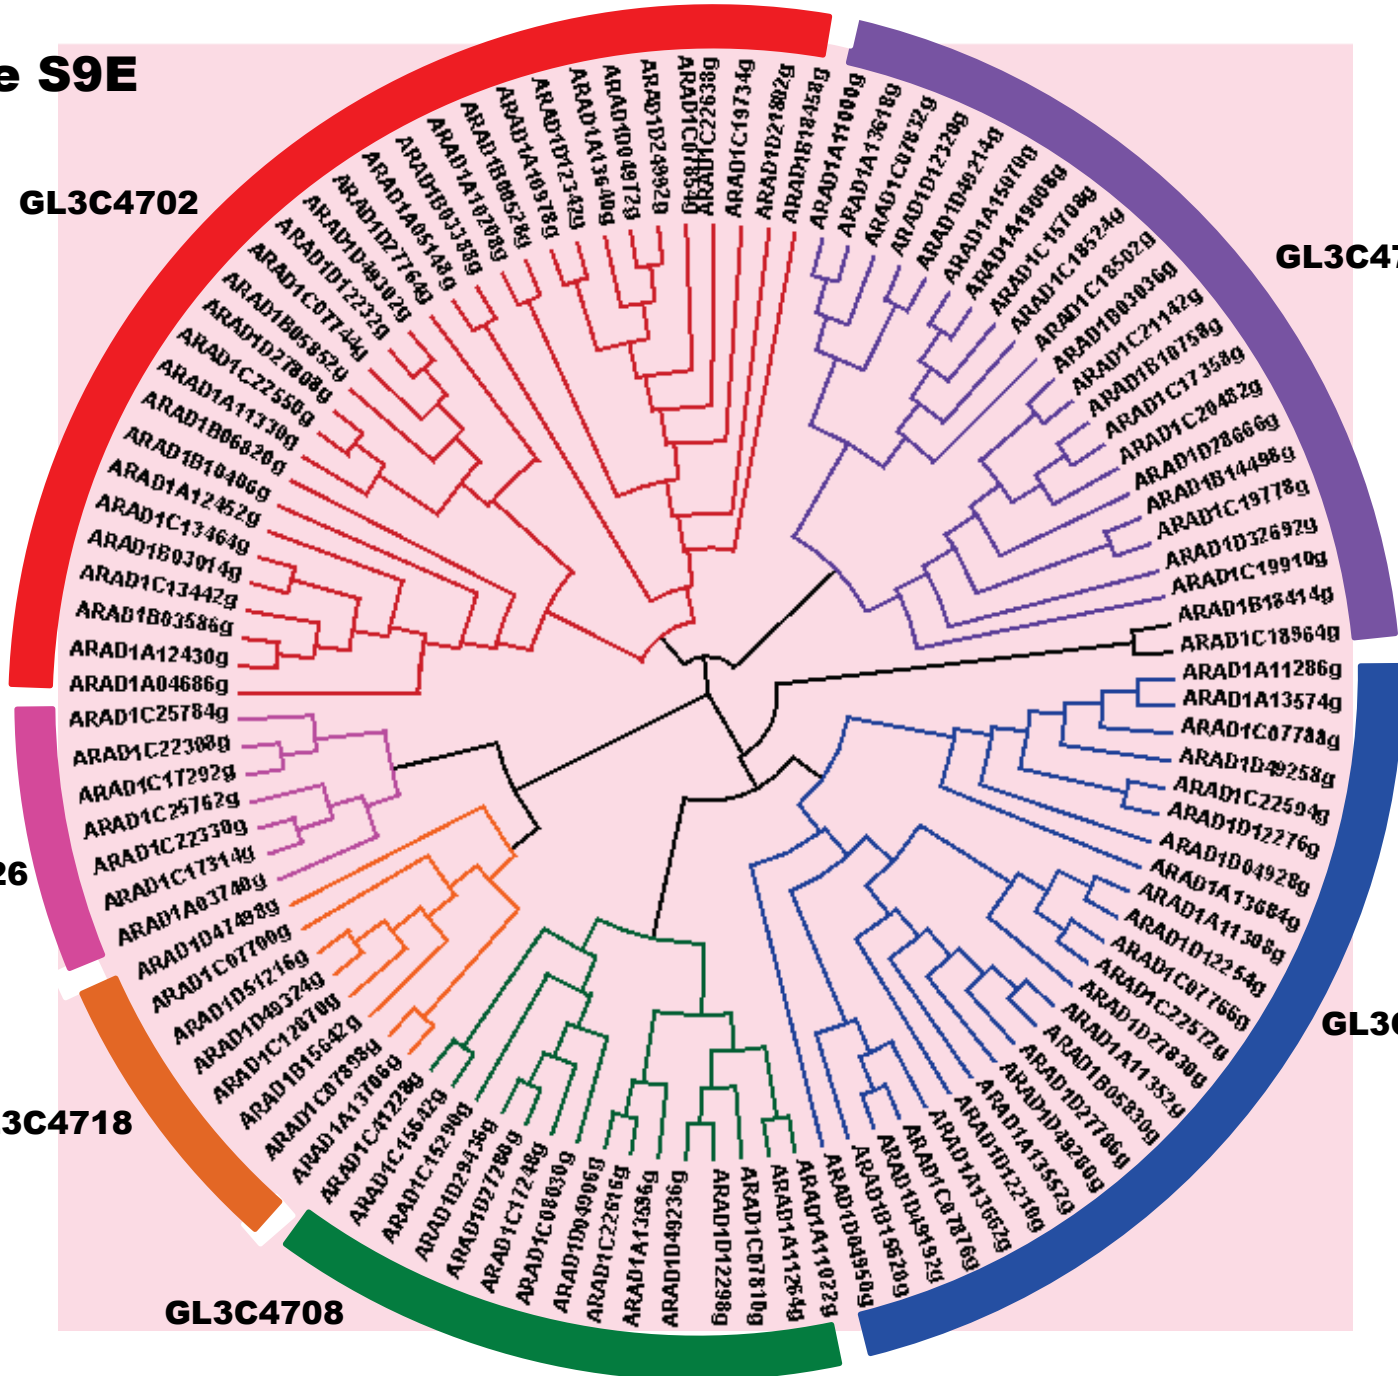

**GL3C4726**

**GL3C4705**

**GL3C4718**

**GL3C4708**
