# Supplementary material for: The complete genome of Blastobotrys (Arxula) adeninivorans LS3 - a yeast of biotechnological interest
Source: PubMed Central journal article supplement (PMC4022394; doi:10.1186/1754-6834-7-66), 2014-04-24
Supplement: 1754-6834-7-66-S10.pdf [file 1754-6834-7-66-S10.pdf]

## **Additional File 10. Transporter distribution in hemiascomycete species**

Transporters were identified through a two step process on the proteomes of *S. cerevisiae*, *C. glabrata*, *K. lactis*, *D. hansenii*, *K. pastoris*, *Y. lipolytica* and *A. adenivorans*: 1) identification of protein products having at least three transmembrane domains using TMHMM (v2.0; <http://www.cbs.dtu.dk/services/TMHMM-2.0>), 2) identification of transporters by a Blastp search against the TCDB database<sup>16</sup>.

**Table S10A Transporter distribution in hemiascomycete species.**

**Table S10B TCDB classification of transporters of *A. adenivorans*.**

**Table S10C Class of transporters amplified in *A. adenivorans* compared to two other pre-CTG species.**

**Figure S10D Phylogeny of sugar porters in *A. adenivorans* and *D. hansenii*.**

**Table S10A Transporter distribution in hemiascomycete species**

| Type            | Subfamily code TCDB | Species   |          |      |      |      |      |      | Total | TCDB Family                                                                          |                                                                   |
|-----------------|---------------------|-----------|----------|------|------|------|------|------|-------|--------------------------------------------------------------------------------------|-------------------------------------------------------------------|
|                 |                     | ARAD      | YALI     | PIPA | DEHA | KLLA | CAGL | SACE |       |                                                                                      |                                                                   |
| α-Type Channels | 1.A.1.10            | <b>1</b>  |          |      |      |      |      |      | 1     | The Voltage-gated Ion Channel (VIC) Family                                           |                                                                   |
|                 | 1.A.1.11            | <b>1</b>  | 1        | 1    | 1    | 1    | 1    | 1    | 7     | The Voltage-gated Ion Channel (VIC) Family                                           |                                                                   |
|                 | 1.A.1.5             | <b>1</b>  |          |      |      |      |      |      | 1     | The Voltage-gated Ion Channel (VIC) Family                                           |                                                                   |
|                 | 1.A.1.7             | <b>1</b>  | 2        |      |      | 1    | 1    | 1    | 6     | The Voltage-gated Ion Channel (VIC) Family                                           |                                                                   |
|                 | 1.A.11.1            |           | 1        |      | 1    | 1    | 1    | 1    | 5     | The Ammonia Transporter Channel (Amt) Family                                         |                                                                   |
|                 | 1.A.11.2            |           | 2        |      | 2    |      |      |      | 4     | The Ammonia Transporter Channel (Amt) Family                                         |                                                                   |
|                 | 1.A.11.3            | <b>2</b>  |          | 3    |      |      |      |      | 5     | The Ammonia Transporter Channel (Amt) Family                                         |                                                                   |
|                 | 1.A.15.1            |           | 1        |      | 1    | 1    | 1    | 1    | 5     | The Non-selective Cation Channel-2 (NSCC2) Family                                    |                                                                   |
|                 | 1.A.15.2            |           |          | 1    |      |      |      |      | 1     | The Non-selective Cation Channel-2 (NSCC2) Family                                    |                                                                   |
|                 | 1.A.16.1            |           | 1        |      | 1    | 1    | 1    | 1    | 5     | The Yeast Stretch-Activated, Cation-Selective, Ca <sup>2+</sup> Channel, Mid1 Family |                                                                   |
|                 | 1.A.17.2            | <b>1</b>  |          |      |      |      |      |      | 1     | The Calcium-Dependent Chloride Channel (Ca-ClC) Family                               |                                                                   |
|                 | 1.A.17.3            |           |          |      | 1    |      |      |      | 1     | The Calcium-Dependent Chloride Channel (Ca-ClC) Family                               |                                                                   |
|                 | 1.A.20.5            |           | 11       |      | 7    | 5    | 1    | 7    | 31    | The BCL2/Adenovirus E1B-interacting Protein 3 (BNip3) Family                         |                                                                   |
|                 | 1.A.20.Y1           |           | 1        |      |      |      |      |      | 1     | The BCL2/Adenovirus E1B-interacting Protein 3 (BNip3) Family                         |                                                                   |
|                 | 1.A.20.Y2           |           | 1        |      | 1    |      |      |      | 2     | The BCL2/Adenovirus E1B-interacting Protein 3 (BNip3) Family                         |                                                                   |
|                 | 1.A.31.Y1           |           | 1        |      |      |      |      |      | 1     | The Annexin (Annexin) Family                                                         |                                                                   |
|                 | 1.A.33.1            |           | 10       |      | 9    | 9    | 11   | 14   | 53    | The Cation Channel-forming Heat Shock Protein-70 (Hsp70) Family                      |                                                                   |
|                 | 1.A.35.2            | <b>2</b>  | 3        |      | 2    | 2    | 2    | 3    | 14    | The CorA Metal Ion Transporter (MIT) Family                                          |                                                                   |
|                 | 1.A.35.5            | <b>1</b>  | 2        |      | 2    | 2    | 2    | 2    | 11    | The CorA Metal Ion Transporter (MIT) Family                                          |                                                                   |
|                 | 1.A.38.1            | <b>1</b>  |          |      | 1    |      |      |      | 2     | The Golgi pH Regulator (GPHR) Family                                                 |                                                                   |
|                 | 1.A.4.4             | <b>3</b>  | 1        | 1    | 1    | 1    | 1    | 2    | 10    | The Transient Receptor Potential Ca <sup>2+</sup> Channel (TRP-CC) Family            |                                                                   |
|                 | 1.A.4.Y1            |           | 2        |      |      |      |      |      | 2     | The Transient Receptor Potential Ca <sup>2+</sup> Channel (TRP-CC) Family            |                                                                   |
|                 | 1.A.55.4            | <b>1</b>  |          |      |      |      |      |      | 1     | The Synaptic Vesicle-Associated Ca <sup>2+</sup> Channel, Flower Family              |                                                                   |
|                 | 1.A.56.1            | <b>2</b>  |          |      |      |      |      |      | 2     | The Copper Transporter (Ctr) Family                                                  |                                                                   |
|                 | 1.A.6.Y1            |           | 1        |      | 1    |      |      |      | 2     | The Epithelial Na <sup>+</sup> Channel (ENaC) Family                                 |                                                                   |
|                 | 1.A.6.Y2            |           | 1        |      | 1    |      |      |      | 2     | The Epithelial Na <sup>+</sup> Channel (ENaC) Family                                 |                                                                   |
|                 | 1.A.8.5             |           |          |      |      | 1    | 2    | 1    | 4     | The Major Intrinsic Protein (MIP) Family                                             |                                                                   |
|                 | 1.A.8.6             | <b>1</b>  | 1        | 1    | 1    | 1    | 2    | 3    | 10    | The Major Intrinsic Protein (MIP) Family                                             |                                                                   |
|                 | 1.A.8.7             |           | 2        | 1    |      |      |      |      | 4     | The Major Intrinsic Protein (MIP) Family                                             |                                                                   |
|                 | 1.A.X1.Y1           |           | 1        |      | 1    |      |      |      | 2     | Unassigned                                                                           |                                                                   |
|                 | β-Barrel Porins     | 1.B.40.1  | <b>2</b> |      |      |      |      |      |       | 2                                                                                    | The Autotransporter-2 (AT-2) Family                               |
|                 |                     | 1.B.53.1  | <b>1</b> |      |      |      |      |      |       | 1                                                                                    | The Filamentous Phage gp3 Channel-Forming Protein (FP-gp3) Family |
|                 |                     | 1.B.8.1   |          | 1    |      | 1    | 1    | 2    | 2     | 7                                                                                    | The Mitochondrial and Plastid Porin (MPP) Family                  |
| 2.A.1.1         |                     | <b>60</b> | 27       | 17   | 48   | 20   | 17   | 34   | 223   | Sugar Porter (SP) Family                                                             |                                                                   |
| 2.A.1.11        |                     | <b>1</b>  |          | 2    |      |      |      |      | 3     | Oxalate: Formate Antiporter (OFA) Family                                             |                                                                   |
| 2.A.1.12        |                     | <b>4</b>  | 6        | 1    | 3    | 2    |      | 1    | 17    | Sialate: H <sup>+</sup> Symporter (SHS) Family                                       |                                                                   |
| 2.A.1.13        |                     | <b>8</b>  | 5        | 3    | 8    | 12   | 3    |      | 39    | Monocarboxylate Porter (MCP) Family (Halestrap, 2011)                                |                                                                   |
| 2.A.1.14        |                     | <b>18</b> | 39       | 14   | 27   | 13   | 6    | 10   | 127   | Anion: Cation Symporter (ACS) Family                                                 |                                                                   |
| 2.A.1.15        |                     | <b>1</b>  |          |      |      |      |      |      | 1     | Aromatic Acid: H <sup>+</sup> Symporter (AAHS) Family                                |                                                                   |
| 2.A.1.16        |                     | <b>6</b>  | 14       | 3    | 5    | 4    | 1    | 6    | 39    | Siderophore-Iron Transporter (SIT) Family                                            |                                                                   |
| 2.A.1.19        |                     | <b>1</b>  |          |      |      |      |      |      | 1     | Organic Cation Transporter (OCT) Family                                              |                                                                   |

|           |           |    |    |    |   |    |    |     |                                                                         |
|-----------|-----------|----|----|----|---|----|----|-----|-------------------------------------------------------------------------|
| 2.A.1.2   | <b>39</b> | 33 | 10 | 24 | 8 | 10 | 12 | 136 | Drug: H+ Antiporter-1 (12 Spanner) (DHA1) Family                        |
| 2.A.1.22  | <b>2</b>  |    |    |    |   |    |    | 2   | Vesicular Neurotransmitter Transporter (VNT) Family                     |
| 2.A.1.24  | <b>2</b>  | 1  | 1  |    | 1 | 1  | 1  | 7   | Unknown Major Facilitator-1 (UMF1) Family                               |
| 2.A.1.25  | <b>1</b>  | 1  | 1  | 1  | 1 | 1  | 1  | 7   | Peptide-Acetyl-Coenzyme A Transporter (PAT) Family                      |
| 2.A.1.28  | <b>1</b>  | 1  |    |    |   |    |    | 2   | Feline Leukemia Virus Subgroup C Receptor (FLVCR) Family                |
| 2.A.1.3   | <b>9</b>  | 7  | 2  | 7  | 6 | 5  | 10 | 46  | Drug: H+ Antiporter-2 (14 Spanner) (DHA2) Family                        |
| 2.A.1.43  |           |    | 1  |    |   |    |    | 1   | The Putative Magnetosome Permease (PMP) Family                          |
| 2.A.1.44  | <b>1</b>  |    | 2  |    |   |    |    | 3   | L-Amino Acid Transporter-3 (LAT3) Family (also called the SLC43 family) |
| 2.A.1.48  | <b>1</b>  |    | 3  |    |   |    |    | 4   | Vacuolar Basic Amino Acid Transporter (V-BAAT) Family                   |
| 2.A.1.58  | <b>3</b>  |    | 1  |    |   |    |    | 4   | N-Acetylglucosamine Transporter (NAG-T) Family                          |
| 2.A.1.63  | <b>1</b>  |    | 1  |    |   |    |    | 2   | Unidentified Major Facilitator-12 (UMF12) Family                        |
| 2.A.1.7   | <b>2</b>  |    |    |    |   |    |    | 2   | Fucose: H+ Symporter (FHS) Family                                       |
| 2.A.1.8   | <b>3</b>  |    |    |    |   |    |    | 3   | Nitrate/Nitrite Porter (NNP) family                                     |
| 2.A.1.9   | <b>3</b>  | 5  | 2  | 3  | 3 | 2  | 2  | 20  | Phosphate: H+ Symporter (PHS) Family                                    |
| 2.A.1.Y1  |           | 5  |    | 1  | 4 | 2  | 4  | 16  | Unassigned                                                              |
| 2.A.1.Y2  |           | 1  |    | 1  |   |    | 1  | 3   | Unassigned                                                              |
| 2.A.1.Y3  |           | 3  |    | 1  |   |    |    | 4   | Unassigned                                                              |
| 2.A.16.3  |           |    | 1  |    |   |    |    | 1   | The Tellurite-resistance/Dicarboxylate Transporter (TDT) Family         |
| 2.A.16.4  | <b>1</b>  |    |    |    |   |    |    | 1   | The Tellurite-resistance/Dicarboxylate Transporter (TDT) Family         |
| 2.A.16.Y1 |           | 1  |    | 3  | 1 | 1  | 1  | 7   | The Tellurite-resistance/Dicarboxylate Transporter (TDT) Family         |
| 2.A.17.2  | <b>2</b>  | 7  |    | 3  | 1 | 1  | 1  | 15  | The Proton-dependent Oligopeptide Transporter (POT) Family              |
| 2.A.18.4  | <b>4</b>  | 1  |    | 3  | 2 |    |    | 10  | The Amino Acid/Auxin Permease (AAAP) Family                             |
| 2.A.18.5  | <b>1</b>  | 1  | 1  | 2  | 1 | 1  | 1  | 8   | The Amino Acid/Auxin Permease (AAAP) Family                             |
| 2.A.18.6  | <b>2</b>  | 2  | 3  | 3  | 3 | 3  | 4  | 20  | The Amino Acid/Auxin Permease (AAAP) Family                             |
| 2.A.18.7  | <b>1</b>  | 1  | 2  | 2  | 2 | 3  | 2  | 13  | The Amino Acid/Auxin Permease (AAAP) Family                             |
| 2.A.18.Y1 |           | 3  |    | 1  |   |    |    | 4   | The Amino Acid/Auxin Permease (AAAP) Family                             |
| 2.A.19.2  | <b>1</b>  | 2  | 1  | 1  | 2 | 2  | 1  | 10  | The Ca <sup>2+</sup> :Cation Antiporter (CaCA) Family                   |
| 2.A.19.4  | <b>1</b>  |    | 2  |    |   |    |    | 3   | The Ca <sup>2+</sup> :Cation Antiporter (CaCA) Family                   |
| 2.A.19.7  | <b>1</b>  |    | 1  |    |   |    |    | 2   | The Ca <sup>2+</sup> :Cation Antiporter (CaCA) Family                   |
| 2.A.19.Y1 |           |    |    | 1  | 1 |    | 1  | 3   | The Ca <sup>2+</sup> :Cation Antiporter (CaCA) Family                   |
| 2.A.2.6   | <b>2</b>  | 1  | 1  |    |   |    |    | 4   | The Glycoside-Pentoside-Hexuronide (GPH):Cation Symporter Family        |
| 2.A.20.2  | <b>1</b>  | 1  | 1  | 1  | 1 |    | 1  | 6   | The Inorganic Phosphate Transporter (PiT) Family                        |
| 2.A.21.6  | <b>2</b>  | 4  | 5  | 3  | 3 | 1  | 1  | 19  | The Solute:Sodium Symporter (SSS) Family                                |
| 2.A.21.9  | <b>2</b>  |    |    |    |   |    |    | 2   | The Solute:Sodium Symporter (SSS) Family                                |
| 2.A.29.1  | <b>1</b>  | 3  |    | 1  | 1 | 1  | 3  | 10  | The Mitochondrial Carrier (MC) Family                                   |
| 2.A.29.10 | <b>1</b>  |    | 1  | 1  | 1 | 1  | 1  | 6   | The Mitochondrial Carrier (MC) Family                                   |
| 2.A.29.12 | <b>1</b>  |    | 1  |    |   |    |    | 2   | The Mitochondrial Carrier (MC) Family                                   |
| 2.A.29.13 |           | 1  |    | 2  | 3 | 3  | 2  | 11  | The Mitochondrial Carrier (MC) Family                                   |
| 2.A.29.14 |           | 1  |    |    |   |    | 1  | 2   | The Mitochondrial Carrier (MC) Family                                   |
| 2.A.29.15 |           | 1  |    | 1  | 1 | 1  | 1  | 5   | The Mitochondrial Carrier (MC) Family                                   |
| 2.A.29.17 | <b>2</b>  | 2  |    | 1  | 1 | 1  | 1  | 8   | The Mitochondrial Carrier (MC) Family                                   |
| 2.A.29.18 | <b>3</b>  | 1  |    | 1  | 1 | 1  | 1  | 8   | The Mitochondrial Carrier (MC) Family                                   |
| 2.A.29.2  | <b>1</b>  | 2  |    | 2  | 1 | 2  | 3  | 11  | The Mitochondrial Carrier (MC) Family                                   |
| 2.A.29.27 | <b>1</b>  |    |    |    |   |    |    | 1   | The Mitochondrial Carrier (MC) Family                                   |
| 2.A.29.4  | <b>1</b>  | 2  |    | 2  | 1 | 1  | 2  | 9   | The Mitochondrial Carrier (MC) Family                                   |

Porters (uniporters, symporters, antiporters)

|            |           |  |    |    |    |    |    |    |     |                                                          |
|------------|-----------|--|----|----|----|----|----|----|-----|----------------------------------------------------------|
| 2.A.29.5   |           |  | 1  |    | 1  | 1  | 2  | 2  | 7   | The Mitochondrial Carrier (MC) Family                    |
| 2.A.29.6   | <b>1</b>  |  | 1  | 1  | 1  | 1  |    |    | 5   | The Mitochondrial Carrier (MC) Family                    |
| 2.A.29.7   |           |  | 3  |    | 3  | 2  | 3  | 2  | 13  | The Mitochondrial Carrier (MC) Family                    |
| 2.A.29.8   | <b>1</b>  |  | 1  | 2  | 1  | 1  | 1  | 1  | 8   | The Mitochondrial Carrier (MC) Family                    |
| 2.A.29.9   |           |  |    |    | 1  | 1  | 1  | 1  | 4   | The Mitochondrial Carrier (MC) Family                    |
| 2.A.29.Y1  |           |  | 1  |    | 1  | 1  | 1  | 1  | 5   | The Mitochondrial Carrier (MC) Family                    |
| 2.A.29.Y10 |           |  | 1  |    | 1  | 1  | 1  | 1  | 5   | The Mitochondrial Carrier (MC) Family                    |
| 2.A.29.Y11 |           |  |    |    |    |    | 1  | 1  | 2   | The Mitochondrial Carrier (MC) Family                    |
| 2.A.29.Y12 |           |  | 1  |    | 1  | 1  | 1  | 1  | 5   | The Mitochondrial Carrier (MC) Family                    |
| 2.A.29.Y13 |           |  | 1  |    | 1  | 1  | 1  | 1  | 5   | The Mitochondrial Carrier (MC) Family                    |
| 2.A.29.Y14 |           |  |    |    | 1  | 1  | 1  |    | 3   | The Mitochondrial Carrier (MC) Family                    |
| 2.A.29.Y15 |           |  |    |    |    |    | 1  |    | 1   | The Mitochondrial Carrier (MC) Family                    |
| 2.A.29.Y16 |           |  | 1  |    |    |    |    |    | 1   | The Mitochondrial Carrier (MC) Family                    |
| 2.A.29.Y17 |           |  | 1  |    | 1  | 1  |    |    | 3   | The Mitochondrial Carrier (MC) Family                    |
| 2.A.29.Y18 |           |  | 1  |    |    |    |    |    | 1   | The Mitochondrial Carrier (MC) Family                    |
| 2.A.29.Y19 |           |  | 2  |    |    |    |    |    | 2   | The Mitochondrial Carrier (MC) Family                    |
| 2.A.29.Y2  |           |  |    |    | 1  | 1  | 1  | 1  | 4   | The Mitochondrial Carrier (MC) Family                    |
| 2.A.29.Y20 |           |  | 1  |    | 1  |    |    |    | 2   | The Mitochondrial Carrier (MC) Family                    |
| 2.A.29.Y21 |           |  | 1  |    | 2  |    |    |    | 3   | The Mitochondrial Carrier (MC) Family                    |
| 2.A.29.Y22 |           |  | 1  |    |    |    |    |    | 1   | The Mitochondrial Carrier (MC) Family                    |
| 2.A.29.Y23 |           |  | 1  |    |    |    |    |    | 1   | The Mitochondrial Carrier (MC) Family                    |
| 2.A.29.Y3  |           |  | 2  |    | 2  | 2  | 2  | 2  | 10  | The Mitochondrial Carrier (MC) Family                    |
| 2.A.29.Y4  |           |  | 1  |    | 1  | 1  | 1  | 2  | 6   | The Mitochondrial Carrier (MC) Family                    |
| 2.A.29.Y5  |           |  | 1  |    | 1  | 2  | 1  | 1  | 6   | The Mitochondrial Carrier (MC) Family                    |
| 2.A.29.Y6  |           |  | 1  |    | 1  | 1  | 1  | 1  | 5   | The Mitochondrial Carrier (MC) Family                    |
| 2.A.29.Y7  |           |  | 1  |    | 2  | 1  | 1  | 1  | 6   | The Mitochondrial Carrier (MC) Family                    |
| 2.A.29.Y8  |           |  |    |    |    | 1  | 1  | 1  | 3   | The Mitochondrial Carrier (MC) Family                    |
| 2.A.3.1    | <b>1</b>  |  | 2  | 1  |    |    |    |    | 4   | The Amino Acid-Polyamine-Organocation (APC) Family       |
| 2.A.3.10   | <b>9</b>  |  | 14 | 12 | 24 | 16 | 14 | 18 | 107 | The Amino Acid-Polyamine-Organocation (APC) Family       |
| 2.A.3.4    | <b>10</b> |  | 9  | 2  | 6  | 6  | 2  | 4  | 39  | The Amino Acid-Polyamine-Organocation (APC) Family       |
| 2.A.3.8    | <b>2</b>  |  | 5  | 4  | 3  | 3  | 3  | 2  | 22  | The Amino Acid-Polyamine-Organocation (APC) Family       |
| 2.A.30.1   |           |  |    | 1  |    |    |    |    | 1   | The Cation-Chloride Cotransporter (CCC) Family           |
| 2.A.30.6   | <b>1</b>  |  |    |    |    |    |    |    | 1   | The Cation-Chloride Cotransporter (CCC) Family           |
| 2.A.30.7   |           |  | 1  |    | 1  | 1  | 1  | 1  | 5   | The Cation-Chloride Cotransporter (CCC) Family           |
| 2.A.31.3   | <b>1</b>  |  | 1  | 1  | 2  | 1  | 1  | 1  | 8   | The Anion Exchanger (AE) Family                          |
| 2.A.36.2   | <b>1</b>  |  | 1  | 1  | 1  | 1  | 1  | 1  | 7   | The Monovalent Cation: Proton Antiporter-1 (CPA1) Family |
| 2.A.36.4   | <b>2</b>  |  | 2  | 1  | 1  | 1  | 1  | 1  | 9   | The Monovalent Cation: Proton Antiporter-1 (CPA1) Family |
| 2.A.37.4   | <b>1</b>  |  |    | 1  | 1  | 1  | 1  | 1  | 6   | The Monovalent Cation: Proton Antiporter-2 (CPA2) Family |
| 2.A.37.Y1  |           |  |    |    | 2  |    |    |    | 2   | The Monovalent Cation: Proton Antiporter-2 (CPA2) Family |
| 2.A.38.2   | <b>2</b>  |  | 1  | 1  |    | 1  | 1  | 2  | 8   | The K+ Transporter (Trk) Family                          |
| 2.A.39.2   | <b>2</b>  |  | 2  | 2  | 3  | 2  | 4  | 4  | 19  | The Nucleobase: Cation Symporter-1 (NCS1) Family         |
| 2.A.39.3   | <b>1</b>  |  | 2  | 2  | 1  | 2  | 2  | 3  | 13  | The Nucleobase: Cation Symporter-1 (NCS1) Family         |
| 2.A.39.4   | <b>1</b>  |  |    | 1  | 1  | 2  | 3  | 3  | 11  | The Nucleobase: Cation Symporter-1 (NCS1) Family         |
| 2.A.4.1    | <b>1</b>  |  |    |    |    |    |    |    | 1   | The Cation Diffusion Facilitator (CDF) Family            |
| 2.A.4.2    | <b>1</b>  |  | 1  | 1  | 1  | 1  | 1  | 2  | 8   | The Cation Diffusion Facilitator (CDF) Family            |

|           |          |    |   |   |   |   |   |    |                                                                             |
|-----------|----------|----|---|---|---|---|---|----|-----------------------------------------------------------------------------|
| 2.A.4.4   | <b>2</b> | 1  | 2 | 1 | 1 | 1 | 1 | 9  | The Cation Diffusion Facilitator (CDF) Family                               |
| 2.A.4.5   | <b>2</b> |    | 1 |   |   |   |   | 3  | The Cation Diffusion Facilitator (CDF) Family                               |
| 2.A.4.Y1  |          | 1  |   | 1 | 1 | 2 | 2 | 7  | The Cation Diffusion Facilitator (CDF) Family                               |
| 2.A.40.5  | <b>1</b> | 2  | 1 | 1 | 1 |   |   | 6  | The Nucleobase: Cation Symporter-2 (NCS2) Family                            |
| 2.A.41.2  | <b>1</b> | 2  |   | 1 |   |   |   | 4  | The Concentrative Nucleoside Transporter (CNT) Family                       |
| 2.A.43.1  | <b>1</b> |    | 1 |   |   |   |   | 2  | The Lysosomal Cystine Transporter (LCT) Family                              |
| 2.A.43.2  |          |    | 1 |   | 1 | 1 | 1 | 4  | The Lysosomal Cystine Transporter (LCT) Family                              |
| 2.A.43.3  | <b>1</b> | 1  |   |   |   |   |   | 2  | The Lysosomal Cystine Transporter (LCT) Family                              |
| 2.A.43.Y1 |          |    |   | 1 |   |   |   | 1  | The Lysosomal Cystine Transporter (LCT) Family                              |
| 2.A.44.2  |          | 1  | 1 | 1 | 1 | 1 | 1 | 6  | The Formate-Nitrite Transporter (FNT) Family                                |
| 2.A.47.2  | <b>1</b> | 1  | 1 | 2 | 2 | 2 | 3 | 12 | The Divalent Anion: Na <sup>+</sup> Symporter (DASS) Family                 |
| 2.A.49.1  | <b>1</b> |    | 1 |   |   |   |   | 2  | The Chloride Carrier/Channel (CIC) Family                                   |
| 2.A.49.2  | <b>2</b> |    | 1 |   |   |   |   | 3  | The Chloride Carrier/Channel (CIC) Family                                   |
| 2.A.49.3  |          | 5  |   | 3 | 3 | 3 | 3 | 17 | The Chloride Carrier/Channel (CIC) Family                                   |
| 2.A.5.1   | <b>4</b> | 4  | 2 | 3 | 1 | 2 | 2 | 18 | The Zinc (Zn <sup>2+</sup> )-Iron (Fe <sup>2+</sup> ) Permease (ZIP) Family |
| 2.A.5.2   |          |    |   |   | 1 | 1 | 1 | 3  | The Zinc (Zn <sup>2+</sup> )-Iron (Fe <sup>2+</sup> ) Permease (ZIP) Family |
| 2.A.5.4   | <b>1</b> |    | 1 |   |   |   |   | 2  | The Zinc (Zn <sup>2+</sup> )-Iron (Fe <sup>2+</sup> ) Permease (ZIP) Family |
| 2.A.5.5   | <b>1</b> |    | 1 |   |   |   |   | 2  | The Zinc (Zn <sup>2+</sup> )-Iron (Fe <sup>2+</sup> ) Permease (ZIP) Family |
| 2.A.5.7   |          |    | 1 |   |   |   |   | 1  | The Zinc (Zn <sup>2+</sup> )-Iron (Fe <sup>2+</sup> ) Permease (ZIP) Family |
| 2.A.5.Y1  |          |    |   |   | 1 |   | 1 | 2  | The Zinc (Zn <sup>2+</sup> )-Iron (Fe <sup>2+</sup> ) Permease (ZIP) Family |
| 2.A.5.Y2  |          | 1  |   | 1 |   |   |   | 2  | The Zinc (Zn <sup>2+</sup> )-Iron (Fe <sup>2+</sup> ) Permease (ZIP) Family |
| 2.A.50.1  | <b>1</b> | 1  | 1 | 1 | 1 | 1 | 2 | 8  | The Glycerol Uptake (GUP) Family                                            |
| 2.A.53.1  | <b>2</b> | 2  | 2 | 3 | 2 | 2 | 3 | 16 | The Sulfate Permease (SulP) Family                                          |
| 2.A.53.7  | <b>1</b> |    | 1 |   |   |   |   | 2  | The Sulfate Permease (SulP) Family                                          |
| 2.A.53.Y1 |          | 1  |   | 1 | 1 | 1 | 1 | 5  | The Sulfate Permease (SulP) Family                                          |
| 2.A.54.1  | <b>1</b> | 1  | 1 | 1 | 1 | 1 | 1 | 6  | The Mitochondrial Tricarboxylate Carrier (MTC) Family                       |
| 2.A.55.1  | <b>2</b> | 2  | 3 | 3 | 3 | 3 | 3 | 19 | The Metal Ion (Mn <sup>2+</sup> -iron) Transporter (Nramp) Family           |
| 2.A.57.3  | <b>1</b> | 1  | 1 | 1 | 1 | 1 | 1 | 7  | The Equilibrative Nucleoside Transporter (ENT) Family                       |
| 2.A.59.1  | <b>1</b> | 1  | 1 | 1 | 2 |   | 1 | 7  | The Arsenical Resistance-3 (ACR3) Family                                    |
| 2.A.6.6   | <b>3</b> | 2  | 3 | 2 | 2 | 2 | 3 | 17 | The Eukaryotic (Putative) Sterol Transporter (EST) Family                   |
| 2.A.6.Y1  |          | 1  |   |   |   |   |   | 1  | Unassigned                                                                  |
| 2.A.66.1  | <b>2</b> | 2  | 2 | 6 | 4 | 2 | 2 | 20 | The Multi Antimicrobial Extrusion (MATE) Family                             |
| 2.A.66.3  | <b>1</b> | 1  | 1 |   | 1 | 1 | 1 | 6  | The Oligosaccharidyl-lipid Flippase (OLF) Family                            |
| 2.A.67.1  | <b>6</b> | 17 | 2 | 4 | 3 |   | 2 | 34 | The Oligopeptide Transporter (OPT) Family                                   |
| 2.A.67.2  | <b>1</b> |    | 1 |   |   |   |   | 2  | The Oligopeptide Transporter (OPT) Family                                   |
| 2.A.67.Y1 |          | 1  |   | 1 | 1 | 1 | 1 | 5  | The Oligopeptide Transporter (OPT) Family                                   |
| 2.A.69.3  |          |    | 2 |   |   |   |   | 2  | The Auxin Efflux Carrier (AEC) Family                                       |
| 2.A.7.10  | <b>1</b> | 1  | 1 |   | 2 |   | 1 | 6  | The UDP-N-Acetylglucosamine:UMP Antiporter (UAA) Family                     |
| 2.A.7.11  | <b>1</b> |    | 1 |   |   |   |   | 2  | The UDP-Galactose:UMP Antiporter (UGA) Family                               |
| 2.A.7.12  | <b>1</b> | 1  | 1 |   |   |   |   | 3  | The CMP-Sialate:CMP Antiporter (CSA) Family                                 |
| 2.A.7.13  | <b>1</b> | 1  | 1 | 1 | 1 | 1 | 3 | 9  | The GDP-Mannose:GMP Antiporter (GMA) Family                                 |
| 2.A.7.24  | <b>3</b> |    | 3 |   |   |   |   | 6  | The Thiamine Pyrophosphate Transporter (TPPT) Family                        |
| 2.A.7.25  | <b>2</b> |    | 2 |   |   |   |   | 4  | The NIPA Mg <sup>2+</sup> Uptake Permease (NIPA) Family                     |
| 2.A.7.3   |          |    | 1 |   |   |   |   | 1  | The 10 TMS Drug/Metabolite Exporter (DME) Family                            |
| 2.A.7.9   | <b>1</b> | 2  | 1 | 3 | 3 | 3 | 3 | 16 | The Triose-phosphate Transporter (TPT) Family                               |

|                                     |           |          |    |    |    |    |    |    |                                                    |                                                                    |
|-------------------------------------|-----------|----------|----|----|----|----|----|----|----------------------------------------------------|--------------------------------------------------------------------|
|                                     | 2.A.7.Y1  |          | 1  |    | 1  | 1  | 1  | 1  | 5                                                  | Unassigned                                                         |
|                                     | 2.A.7.Y2  |          | 1  |    |    |    |    |    | 1                                                  | Unassigned                                                         |
|                                     | 2.A.72.2  |          | 2  |    |    |    |    |    | 2                                                  | The K+ Uptake Permease (KUP) Family                                |
|                                     | 2.A.85.3  | <b>4</b> |    | 1  |    |    |    |    | 5                                                  | The Aromatic Acid Exporter (ArAE) Family                           |
|                                     | 2.A.85.4  | <b>1</b> |    |    |    |    |    |    | 1                                                  | The Aromatic Acid Exporter (ArAE) Family                           |
|                                     | 2.A.89.1  | <b>1</b> |    |    |    |    |    |    | 1                                                  | The Vacuolar Iron Transporter (VIT) Family                         |
|                                     | 2.A.9.1   | <b>1</b> | 1  |    | 1  | 1  | 1  | 1  | 6                                                  | The Cytochrome Oxidase Biogenesis (Oxa1) Family                    |
|                                     | 2.A.92.1  | <b>1</b> |    | 1  |    |    |    |    | 2                                                  | The Choline Transporter-like (CTL) Family                          |
|                                     | 2.A.93.1  |          |    | 1  |    |    |    |    | 1                                                  | The Unknown BART Superfamily-1 (UBS1) Family                       |
|                                     | 2.A.94.1  | <b>4</b> |    | 2  |    |    |    |    | 6                                                  | The Phosphate Permease (Pho1) Family                               |
|                                     | 2.A.96.1  | <b>5</b> |    | 5  |    |    |    |    | 10                                                 | The YaaH (YaaH) Family                                             |
|                                     | 2.A.X1.Y1 |          | 2  |    |    | 2  | 1  |    | 5                                                  | Unassigned                                                         |
|                                     | 2.A.X2.Y1 |          | 1  |    | 2  | 1  |    |    | 4                                                  | Unassigned                                                         |
| Primary Active Transporters         | 3.A.1.201 | <b>1</b> | 3  | 1  |    |    |    |    | 5                                                  | The Multidrug Resistance Exporter (MDR) Family (ABCB)              |
|                                     | 3.A.1.203 | <b>2</b> | 2  |    | 2  | 2  | 2  | 2  | 12                                                 | The Peroxisomal Fatty Acyl CoA Transporter (P-FAT) Family (ABCD)   |
|                                     | 3.A.1.204 | <b>3</b> | 2  | 1  | 1  | 1  | 1  | 1  | 10                                                 | The Eye Pigment Precursor Transporter (EPP) Family (ABCG)          |
|                                     | 3.A.1.205 | <b>5</b> | 6  | 6  | 8  | 5  | 6  | 9  | 45                                                 | The Pleiotropic Drug Resistance (PDR) Family (ABCG)                |
|                                     | 3.A.1.206 | <b>1</b> | 1  | 1  | 1  | 1  | 1  | 1  | 7                                                  | The a-Factor Sex Pheromone Exporter (STE) Family (ABCB)            |
|                                     | 3.A.1.208 | <b>4</b> | 10 | 5  | 4  | 4  | 5  | 7  | 39                                                 | The Drug Conjugate Transporter (DCT) Family (ABCC)                 |
|                                     | 3.A.1.210 | <b>1</b> | 1  | 1  | 1  | 1  | 1  | 1  | 7                                                  | The Heavy Metal Transporter (HMT) Family                           |
|                                     | 3.A.1.211 | <b>1</b> | 1  |    |    |    |    |    | 2                                                  | The Cholesterol/Phospholipid/Retinal (CPR) Flippase Family         |
|                                     | 3.A.1.212 | <b>1</b> | 1  | 1  | 2  | 2  | 2  | 2  | 11                                                 | The Mitochondrial Peptide Exporter (MPE) Family                    |
|                                     | 3.A.12.1  | <b>1</b> |    |    |    |    |    |    | 1                                                  | The Septal DNA Translocator (S-DNA-T) Family                       |
|                                     | 3.A.16.1  | <b>2</b> |    | 1  |    |    |    |    | 3                                                  | The Endoplasmic Reticular Retrotranslocon (ER-RT) Family           |
|                                     | 3.A.18.1  | <b>3</b> |    | 1  |    |    |    |    | 4                                                  | The Nuclear mRNA Exporter (mRNA-E) Family                          |
|                                     | 3.A.2.1   |          | 7  |    | 8  | 10 | 8  | 12 | 45                                                 | The H+- or Na+-translocating F-type Family                         |
|                                     | 3.A.2.2   | <b>5</b> | 14 | 5  | 15 | 15 | 15 | 16 | 85                                                 | The H+- or Na+-translocating F-type Family                         |
|                                     | 3.A.3.1   | <b>1</b> |    |    |    |    |    |    | 1                                                  | The Na+, K+ ATPase Family                                          |
|                                     | 3.A.3.10  | <b>1</b> |    | 1  |    |    |    |    | 2                                                  | Functionally Uncharacterized P-type ATPase Family                  |
|                                     | 3.A.3.14  |          |    | 1  |    |    |    |    | 1                                                  | Functionally Uncharacterized P-type ATPase Family                  |
|                                     | 3.A.3.15  | <b>1</b> |    |    |    |    |    |    | 1                                                  | Functionally Uncharacterized P-type ATPase Family                  |
|                                     | 3.A.3.2   | <b>3</b> | 2  | 2  | 2  | 2  | 3  | 2  | 16                                                 | The Ca2+-ATPase Family                                             |
|                                     | 3.A.3.3   | <b>2</b> | 1  | 1  | 1  | 1  | 1  | 2  | 9                                                  | Unassigned                                                         |
|                                     | 3.A.3.5   | <b>2</b> | 2  | 2  | 2  | 2  | 1  | 2  | 13                                                 | The Cu+-, Ag+-ATPase (efflux) Family                               |
|                                     | 3.A.3.8   | <b>5</b> | 4  | 5  | 4  | 4  | 5  | 5  | 32                                                 | The Phospholipid Translocating P-type ATPase Family                |
|                                     | 3.A.3.9   | <b>1</b> | 2  | 1  | 2  | 2  | 1  | 3  | 12                                                 | The Monovalent Alkali Cation (Na+ and K+) ATPase (efflux) Family   |
|                                     | 3.A.3.Y1  |          | 2  |    | 3  | 2  | 2  | 2  | 11                                                 | Unassigned                                                         |
|                                     | 3.A.5.8   | <b>4</b> | 9  | 2  | 9  | 12 | 9  | 11 | 56                                                 | The General Secretory Pathway (Sec) Family                         |
|                                     | 3.A.5.9   | <b>1</b> |    |    |    |    |    |    | 1                                                  | The General Secretory Pathway (Sec) Family                         |
| 3.A.8.1                             | <b>1</b>  | 17       |    | 13 | 13 | 14 | 14 | 72 | The Mitochondrial Protein Translocase (MPT) Family |                                                                    |
| 3.A.8.2                             |           | 7        |    | 11 | 12 | 10 | 15 | 55 | The Mitochondrial Protein Translocase (MPT) Family |                                                                    |
| Decarboxylation-driven transporters | 3.B.1.1   |          | 2  |    | 1  | 1  | 2  |    |                                                    | The Na+-transporting Carboxylic Acid Decarboxylase (NaT-DC) Family |

|                                                                                                        |           |          |    |   |    |    |    |    |                                                                  |                                                                                      |
|--------------------------------------------------------------------------------------------------------|-----------|----------|----|---|----|----|----|----|------------------------------------------------------------------|--------------------------------------------------------------------------------------|
| Oxidoreduction-driven transporters                                                                     | 3.D.1.2   |          | 8  |   | 8  |    |    |    | 16                                                               | The H <sup>+</sup> or Na <sup>+</sup> -translocating NADH Dehydrogenase (NDH) Family |
|                                                                                                        | 3.D.1.6   | <b>1</b> |    |   |    |    |    |    | 1                                                                | The H <sup>+</sup> or Na <sup>+</sup> -translocating NADH Dehydrogenase (NDH) Family |
|                                                                                                        | 3.D.3.3   |          | 6  |   | 9  | 8  | 8  | 10 | 41                                                               | The Proton-translocating Quinol: Cytochrome c Reductase (QCR) Family                 |
|                                                                                                        | 3.D.4.4   |          |    | 1 |    |    |    |    | 1                                                                |                                                                                      |
| Light absorption-driven transporters                                                                   | 3.D.4.8   | <b>2</b> | 7  | 1 | 10 | 10 | 7  | 15 | 52                                                               | The Proton-translocating Cytochrome Oxidase (COX) Family                             |
|                                                                                                        | 3.E.1.4   |          |    |   |    |    | 3  | 3  | 6                                                                | The Ion-translocating Microbial Rhodopsin (MR) Family                                |
| Transmembrane Electron Carriers                                                                        | 3.E.1.5   | <b>1</b> |    |   |    |    |    |    | 1                                                                | The Ion-translocating Microbial Rhodopsin (MR) Family                                |
|                                                                                                        | 5.B.1.4   |          |    | 1 |    |    |    |    | 1                                                                | The Phagocyte (gp91phox) NADPH Oxidase Family                                        |
|                                                                                                        | 5.B.1.5   | <b>8</b> |    | 1 |    |    |    |    | 9                                                                | The Phagocyte (gp91phox) NADPH Oxidase Family                                        |
|                                                                                                        | 5.B.1.7   | <b>3</b> |    | 4 |    |    |    |    | 7                                                                | The Phagocyte (gp91phox) NADPH Oxidase Family                                        |
| Accessory Factors Involved in Transport                                                                | 5.B.2.1   | <b>1</b> |    |   |    |    |    |    | 1                                                                | The Eukaryotic Cytochrome b561 (Cytb561) Family                                      |
|                                                                                                        | 8.A.13.1  |          | 1  |   | 1  | 1  | 1  | 1  | 5                                                                | The Tetratricopeptide Repeat (Tpr1) Family                                           |
|                                                                                                        | 8.A.15.Y1 |          | 1  |   |    |    |    | 1  | 2                                                                | The K <sup>+</sup> Channel Accessory Protein (KChAP) Family                          |
|                                                                                                        | 8.A.27.1  | <b>1</b> |    |   |    |    |    |    | 1                                                                | The Phospholipid Importer $\beta$ -subunit (PLI- $\beta$ ) Family                    |
|                                                                                                        | 8.A.5.1   |          | 2  |   | 3  | 1  |    | 1  | 7                                                                | The Voltage-gated K <sup>+</sup> Channel $\beta$ -subunit (Kv $\beta$ ) Family       |
|                                                                                                        | 8.A.6.1   |          | 1  |   | 1  | 1  | 1  | 1  | 5                                                                | The Auxiliary Nutrient Transporter (ANT) Family                                      |
|                                                                                                        | 8.A.9.1   |          |    |   | 2  | 2  |    |    | 4                                                                | The rBAT Transport Accessory Protein (rBAT) Family                                   |
|                                                                                                        | 8.A.9.Y1  |          |    |   |    |    |    | 7  | 7                                                                | The rBAT Transport Accessory Protein (rBAT) Family                                   |
| Incompletely Characterized Transport Systems: Recognized transporters of unknown biochemical mechanism | 9.A.1.1   |          | 1  |   | 2  | 2  | 3  | 3  | 11                                                               | The Non ABC Multidrug Exporter (N-MDE) Family                                        |
|                                                                                                        | 9.A.10.1  | <b>3</b> | 3  | 3 | 4  | 2  | 2  | 2  | 19                                                               | The Oxidase-dependent Fe <sup>2+</sup> Transporter (OFeT) Family                     |
|                                                                                                        | 9.A.10.Y1 |          | 3  |   | 2  | 3  | 3  | 3  | 14                                                               | Unassigned                                                                           |
|                                                                                                        | 9.A.12.1  |          |    |   |    | 1  | 2  |    | 3                                                                | The Peptidoglycolipid Addressing Protein (GAP) Family                                |
|                                                                                                        | 9.A.12.2  |          |    |   |    | 1  | 1  | 1  | 3                                                                | The Peptidoglycolipid Addressing Protein (GAP) Family                                |
|                                                                                                        | 9.A.12.Y1 |          | 1  |   |    |    |    |    | 1                                                                | The Peptidoglycolipid Addressing Protein (GAP) Family                                |
|                                                                                                        | 9.A.12.Y2 |          |    |   | 1  |    |    |    | 1                                                                | The Peptidoglycolipid Addressing Protein (GAP) Family                                |
|                                                                                                        | 9.A.12.Y3 |          |    |   | 1  |    |    |    | 1                                                                | The Peptidoglycolipid Addressing Protein (GAP) Family                                |
|                                                                                                        | 9.A.12.Y4 |          |    |   | 1  |    |    |    | 1                                                                | The Peptidoglycolipid Addressing Protein (GAP) Family                                |
|                                                                                                        | 9.A.12.Y5 |          |    |   |    | 1  |    |    | 1                                                                | The Peptidoglycolipid Addressing Protein (GAP) Family                                |
|                                                                                                        | 9.A.14.1  | <b>3</b> |    | 1 |    |    |    |    | 4                                                                | The G-protein-coupled receptor (GPCR) Family                                         |
|                                                                                                        | 9.A.14.Y1 |          | 21 |   | 23 | 25 | 27 | 29 | 125                                                              | The G-protein-coupled receptor (GPCR) Family                                         |
|                                                                                                        | 9.A.14.Y2 |          | 1  |   | 1  | 2  | 1  | 1  | 6                                                                | The G-protein-coupled receptor (GPCR) Family                                         |
|                                                                                                        | 9.A.14.Y3 |          | 13 |   | 15 | 15 | 17 | 16 | 76                                                               | The G-protein-coupled receptor (GPCR) Family                                         |
|                                                                                                        | 9.A.14.Y4 |          | 4  |   | 4  | 5  | 4  | 5  | 22                                                               | The G-protein-coupled receptor (GPCR) Family                                         |
|                                                                                                        | 9.A.14.Y5 |          | 6  |   | 9  | 7  | 8  | 7  | 37                                                               | The G-protein-coupled receptor (GPCR) Family                                         |
|                                                                                                        | 9.A.26.1  | <b>5</b> |    | 2 | 4  | 1  | 1  | 4  | 17                                                               | The Lipid-translocating Exporter (LTE) Family                                        |
|                                                                                                        | 9.A.26.2  |          | 2  |   | 1  | 1  | 1  | 1  | 6                                                                | The Lipid-translocating Exporter (LTE) Family                                        |
|                                                                                                        | 9.A.27.1  | <b>1</b> |    | 1 |    |    |    |    | 2                                                                | The Non-Classical Protein Exporter (NCPE) Family                                     |
|                                                                                                        | 9.A.40.3  | <b>2</b> |    |   |    |    |    |    | 2                                                                | The HlyC/CorC (HCC) Family                                                           |
| 9.A.45.1                                                                                               | <b>1</b>  |          | 1  |   |    |    |    | 2  | The Magnesium Transporter1 (MagT1) Family                        |                                                                                      |
| 9.A.46.1                                                                                               | <b>2</b>  |          | 1  |   |    |    |    | 3  | The Putative Low Affinity Ca <sup>2+</sup> Channel (LACC) Family |                                                                                      |
| 9.A.5.1                                                                                                |           | 27       |    | 7 | 10 | 11 | 10 | 65 | The Putative Arginine Transporter (ArgW) Family                  |                                                                                      |
| 9.A.6.1                                                                                                | <b>3</b>  |          | 2  |   |    |    |    | 5  | The ATP Exporter (ATP-E) Family                                  |                                                                                      |

|  |           |            |     |     |     |     |     |     |                                                                         |                                                             |
|--|-----------|------------|-----|-----|-----|-----|-----|-----|-------------------------------------------------------------------------|-------------------------------------------------------------|
|  | 9.A.9.1   |            | 2   |     | 1   | 1   | 1   | 5   | The Low Affinity Fe <sup>2+</sup> Transporter (FeT) Family              |                                                             |
|  | 9.B.1.1   | <b>1</b>   |     |     | 1   | 1   | 1   | 4   | The Metal Homeostasis Protein (MHP) Family                              |                                                             |
|  | 9.B.1.Y1  |            | 1   |     | 1   |     |     | 2   | The Metal Homeostasis Protein (MHP) Family                              |                                                             |
|  | 9.B.12.1  |            |     |     | 1   |     | 1   | 2   | The (Salt or Low Temperature) Stress-induced Hydrophobic Peptide Family |                                                             |
|  | 9.B.12.3  | <b>1</b>   | 2   |     | 3   | 1   | 3   | 10  | The (Salt or Low Temperature) Stress-induced Hydrophobic Peptide Family |                                                             |
|  | 9.B.17.1  |            | 14  |     | 3   | 3   | 5   | 5   | 30                                                                      | The VAMP-associated protein (VAP) Family                    |
|  | 9.B.17.Y1 |            | 1   |     | 4   | 2   | 3   | 4   | 14                                                                      | The VAMP-associated protein (VAP) Family                    |
|  | 9.B.17.Y2 |            | 1   |     | 2   |     |     |     | 3                                                                       | The VAMP-associated protein (VAP) Family                    |
|  | 9.B.19.1  | <b>1</b>   |     |     |     |     |     |     | 1                                                                       | The Mn <sup>2+</sup> Homeostasis Protein (MnHP) Family      |
|  | 9.B.2.1   |            |     |     |     |     | 1   | 1   | 2                                                                       | The Ca <sup>2+</sup> Homeostasis Protein (CHP) Family       |
|  | 9.B.2.Y1  |            |     |     | 1   |     |     |     | 1                                                                       | The Ca <sup>2+</sup> Homeostasis Protein (CHP) Family       |
|  | 9.B.24.3  | <b>1</b>   |     | 1   |     |     |     |     | 2                                                                       | The Outer Membrane Protein NiIB/OmpU (NiIB) Family          |
|  | 9.B.24.Y1 |            |     |     |     | 1   | 1   | 1   | 3                                                                       | The Outer Membrane Protein NiIB/OmpU (NiIB) Family          |
|  | 9.B.24.Y2 |            | 1   |     |     |     |     |     | 1                                                                       | The Outer Membrane Protein NiIB/OmpU (NiIB) Family          |
|  | 9.B.24.Y3 |            |     |     | 1   |     |     |     | 1                                                                       | The Outer Membrane Protein NiIB/OmpU (NiIB) Family          |
|  | 9.B.26.3  | <b>1</b>   |     | 1   |     |     |     |     | 2                                                                       | The PF27 (PF27) Family                                      |
|  | 9.B.26.Y1 |            |     |     | 1   | 1   | 1   | 1   | 4                                                                       | The PF27 (PF27) Family                                      |
|  | 9.B.26.Y2 |            | 1   |     |     |     |     |     | 1                                                                       | The PF27 (PF27) Family                                      |
|  | 9.B.32.1  | <b>4</b>   |     | 1   |     |     |     |     | 5                                                                       | The Putative Vectorial Glycosyl Polymerization (VGP) Family |
|  | 9.B.33.1  |            | 6   |     | 7   | 4   | 3   | 3   | 23                                                                      | The Sensor Histidine Kinase (SHK) Family                    |
|  | 9.B.37.1  | <b>2</b>   |     | 1   |     |     |     |     | 3                                                                       | The Huntington-interacting Protein 14 (HIP14) Family        |
|  | 9.B.37.2  | <b>3</b>   |     | 3   |     |     |     |     | 6                                                                       | The Huntington-interacting Protein 14 (HIP14) Family        |
|  | 9.B.37.3  |            |     | 1   |     |     |     |     | 1                                                                       | The Huntington-interacting Protein 14 (HIP14) Family        |
|  | 9.B.4.Y1  |            |     |     | 1   |     |     |     | 1                                                                       | The Universal Stress Protein-B (UspB) Family                |
|  | 9.B.4.Y2  |            | 1   |     |     | 1   | 1   |     | 3                                                                       | The Universal Stress Protein-B (UspB) Family                |
|  | 9.B.4.Y3  |            | 2   |     |     | 1   | 1   |     | 4                                                                       | The Universal Stress Protein-B (UspB) Family                |
|  | 9.B.7.2   | <b>1</b>   |     | 1   |     |     |     |     | 2                                                                       | The Putative Sulfate Transporter (CysZ) Family              |
|  | 9.B.82.1  | <b>1</b>   |     |     |     |     |     |     | 1                                                                       | Putative Heavy Metal Transporter (Rer1) Family              |
|  | Total     | <b>430</b> | 597 | 253 | 538 | 439 | 398 | 508 | 3163                                                                    |                                                             |



**Table S10B TCDB classification of transporters of *A. adenivorans***

| Gene ARAD1   | Nb TMH | TCDB Best Hit    | TCDB class | TCDB Annotation of best hit                                                                 |
|--------------|--------|------------------|------------|---------------------------------------------------------------------------------------------|
| ARAD1C38192g | 4      | gnl TC-DB P35499 | 1.A.1.10   | Sodium channel protein type 4 subunit alpha - <i>Homo sapiens</i> (Human).                  |
| ARAD1D08602g | 21     | gnl TC-DB P50077 | 1.A.1.11   | Calcium-channel protein CCH1 - <i>Saccharomyces cerevisiae</i> (Baker's yeast).             |
| ARAD1D15510g | 3      | gnl TC-DB O54899 | 1.A.1.5    | Brain cyclic nucleotide gated 1 - <i>mus musculus</i> (mouse).                              |
| ARAD1D15488g | 10     | gnl TC-DB P40310 | 1.A.1.7    | Outward-rectifier potassium channel Tok1 - <i>Saccharomyces cerevisiae</i> (baker's yeast). |
| ARAD1D14960g | 11     | gnl TC-DB P40260 | 1.A.11.3   | Ammonium transporter mep1 - <i>Saccharomyces cerevisiae</i> (baker's yeast).                |
| ARAD1D31020g | 11     | gnl TC-DB Q59UP8 | 1.A.11.3   | Putative uncharacterized protein MEP2 - <i>Candida albicans</i>                             |
| ARAD1C40876g | 8      | gnl TC-DB D0NGF4 | 1.A.17.2   | Anoctamin-like protein - <i>Phytophthora infestans</i>                                      |
| ARAD1D40766g | 2      | gnl TC-DB Q08269 | 1.A.35.2   | Aluminum resistance protein 1 - <i>Saccharomyces cerevisiae</i> (Baker's yeast).            |
| ARAD1D30888g | 3      | gnl TC-DB P35724 | 1.A.35.2   | Manganese resistance protein - <i>Saccharomyces cerevisiae</i> (baker's yeast).             |
| ARAD1A11616g | 2      | gnl TC-DB Q01926 | 1.A.35.5   | Mitochondrial RNA splicing protein Mrs2 precursor - <i>Saccharomyces cerevisiae</i>         |
| ARAD1D49830g | 8      | gnl TC-DB B2ZXD5 | 1.A.38.1   | Golgi pH regulator - <i>Cricetulus griseus</i>                                              |
| ARAD1B20526g | 7      | gnl TC-DB Q12324 | 1.A.4.4    | Calcium channel YVC1 - <i>Saccharomyces cerevisiae</i> (Baker's yeast).                     |
| ARAD1A02750g | 8      | gnl TC-DB Q12324 | 1.A.4.4    | Calcium channel YVC1 - <i>Saccharomyces cerevisiae</i> (Baker's yeast).                     |
| ARAD1C07194g | 6      | gnl TC-DB Q12324 | 1.A.4.4    | Calcium channel YVC1 - <i>Saccharomyces cerevisiae</i> (Baker's yeast).                     |
| ARAD1B13992g | 3      | gnl TC-DB B8N1Q6 | 1.A.55.4   | Clathrin-coated vesicle protein, putative - <i>Aspergillus flavus</i> strain ATCC 200026    |
| ARAD1D05984g | 3      | gnl TC-DB O94722 | 1.A.56.1   | Copper transport protein ctr4 (Copper transporter 4) - <i>Schizosaccharomyces pombe</i>     |
| ARAD1C44748g | 3      | gnl TC-DB A9XIK8 | 1.A.56.1   | CTR2 long splice variant- <i>Colletotrichum gloeosporioides f. sp. aeshynomenes</i>         |
| ARAD1D01562g | 7      | gnl TC-DB Q9C411 | 1.A.8.6    | Aquaporin 2 - <i>Saccharomyces chevalieri</i> .                                             |
| ARAD1C31372g | 2      | gnl TC-DB B3FNS7 | 1.B.40.1   | Trimeric autotransporter adhesin - <i>Haemophilus sp.</i>                                   |
| ARAD1C24640g | 4      | gnl TC-DB B3FNS7 | 1.B.40.1   | Trimeric autotransporter adhesin - <i>Haemophilus sp.</i> 1595                              |
| ARAD1B05038g | 3      | gnl TC-DB P69169 | 1.B.53.1   | Coat protein A - <i>Enterobacteria</i> phage f1                                             |
| ARAD1D16676g | 8      | gnl TC-DB Q14770 | 2.A.1.1    | Fructose transporter - <i>Homo sapiens</i> (human).                                         |
| ARAD1C12694g | 5      | gnl TC-DB P53048 | 2.A.1.1    | General alpha-glucoside permease - <i>Saccharomyces cerevisiae</i> (Baker's yeast).         |
| ARAD1D18106g | 10     | gnl TC-DB P53048 | 2.A.1.1    | General alpha-glucoside permease - <i>Saccharomyces cerevisiae</i> (Baker's yeast).         |
| ARAD1D18062g | 12     | gnl TC-DB P53048 | 2.A.1.1    | General alpha-glucoside permease - <i>Saccharomyces cerevisiae</i> (Baker's yeast).         |
| ARAD1C05104g | 8      | gnl TC-DB P53048 | 2.A.1.1    | General alpha-glucoside permease - <i>Saccharomyces cerevisiae</i> (Baker's yeast).         |
| ARAD1D51040g | 12     | gnl TC-DB P53048 | 2.A.1.1    | General alpha-glucoside permease - <i>Saccharomyces cerevisiae</i> (Baker's yeast).         |
| ARAD1D42680g | 11     | gnl TC-DB Q5A8J5 | 2.A.1.1    | Glycerol/H+ symportertransporter STL1 - <i>Candida albicans</i>                             |
| ARAD1A14102g | 12     | gnl TC-DB Q5A8J5 | 2.A.1.1    | Glycerol/H+ symportertransporter STL1 - <i>Candida albicans</i>                             |
| ARAD1A19954g | 10     | gnl TC-DB Q5A8J5 | 2.A.1.1    | Glycerol/H+ symportertransporter STL1 - <i>Candida albicans</i>                             |
| ARAD1B17908g | 12     | gnl TC-DB Q5A8J5 | 2.A.1.1    | Glycerol/H+ symportertransporter STL1 - <i>Candida albicans</i>                             |
| ARAD1D26840g | 10     | gnl TC-DB Q5A8J5 | 2.A.1.1    | Glycerol/H+ symportertransporter STL1 - <i>Candida albicans</i>                             |
| ARAD1A06754g | 11     | gnl TC-DB P39932 | 2.A.1.1    | Glycerol/H+ symportertransporter STL1 - <i>Saccharomyces cerevisiae</i> (Baker's yeast).    |
| ARAD1A08778g | 12     | gnl TC-DB P39932 | 2.A.1.1    | Glycerol/H+ symportertransporter STL1 - <i>Saccharomyces cerevisiae</i> (Baker's yeast).    |
| ARAD1B10296g | 10     | gnl TC-DB P39932 | 2.A.1.1    | Glycerol/H+ symportertransporter STL1 - <i>Saccharomyces cerevisiae</i> (Baker's yeast).    |

|              |    |                  |         |                                                                                                       |
|--------------|----|------------------|---------|-------------------------------------------------------------------------------------------------------|
| ARAD1C18216g | 10 | gnl TC-DB P39932 | 2.A.1.1 | Glycerol/H+ symportertransporter STL1 - <i>Saccharomyces cerevisiae</i> (Baker's yeast).              |
| ARAD1D03476g | 9  | gnl TC-DB P39932 | 2.A.1.1 | Glycerol/H+ symportertransporter STL1 - <i>Saccharomyces cerevisiae</i> (Baker's yeast).              |
| ARAD1D18084g | 12 | gnl TC-DB P39932 | 2.A.1.1 | Glycerol/H+ symportertransporter STL1 - <i>Saccharomyces cerevisiae</i> (Baker's yeast).              |
| ARAD1D18634g | 12 | gnl TC-DB P39932 | 2.A.1.1 | Glycerol/H+ symportertransporter STL1 - <i>Saccharomyces cerevisiae</i> (Baker's yeast).              |
| ARAD1D29634g | 10 | gnl TC-DB P39932 | 2.A.1.1 | Glycerol/H+ symportertransporter STL1 - <i>Saccharomyces cerevisiae</i> (Baker's yeast).              |
| ARAD1D41998g | 12 | gnl TC-DB P39932 | 2.A.1.1 | Glycerol/H+ symportertransporter STL1 - <i>Saccharomyces cerevisiae</i> (Baker's yeast).              |
| ARAD1D50710g | 10 | gnl TC-DB P39932 | 2.A.1.1 | Glycerol/H+ symportertransporter STL1 - <i>Saccharomyces cerevisiae</i> (Baker's yeast).              |
| ARAD1B01298g | 12 | gnl TC-DB Q8NJ22 | 2.A.1.1 | Hexose transporter (Similarity) - <i>Kluyveromyces lactis</i> (Yeast).                                |
| ARAD1B17622g | 10 | gnl TC-DB Q8NJ22 | 2.A.1.1 | Hexose transporter (Similarity) - <i>Kluyveromyces lactis</i> (Yeast).                                |
| ARAD1D05016g | 10 | gnl TC-DB Q8NJ22 | 2.A.1.1 | Hexose transporter (Similarity) - <i>Kluyveromyces lactis</i> (Yeast).                                |
| ARAD1B23166g | 11 | gnl TC-DB P43581 | 2.A.1.1 | Hexose transporter HXT10 - <i>Saccharomyces cerevisiae</i> (Baker's yeast).                           |
| ARAD1B12496g | 12 | gnl TC-DB P49374 | 2.A.1.1 | High-affinity glucose transporter - <i>Kluyveromyces lactis</i> (Yeast) ( <i>Candida sphaerica</i> ). |
| ARAD1B12518g | 11 | gnl TC-DB P49374 | 2.A.1.1 | High-affinity glucose transporter - <i>Kluyveromyces lactis</i> (Yeast) ( <i>Candida sphaerica</i> ). |
| ARAD1D10362g | 10 | gnl TC-DB P49374 | 2.A.1.1 | High-affinity glucose transporter - <i>Kluyveromyces lactis</i> (Yeast) ( <i>Candida sphaerica</i> ). |
| ARAD1B09900g | 8  | gnl TC-DB P49374 | 2.A.1.1 | High-affinity glucose transporter - <i>Kluyveromyces lactis</i> (Yeast) ( <i>Candida sphaerica</i> ). |
| ARAD1A15246g | 10 | gnl TC-DB P49374 | 2.A.1.1 | High-affinity glucose transporter - <i>Kluyveromyces lactis</i> (Yeast) ( <i>Candida sphaerica</i> ). |
| ARAD1D50952g | 8  | gnl TC-DB P39003 | 2.A.1.1 | High-affinity hexose transporter HXT6 - <i>Saccharomyces cerevisiae</i> (Baker's yeast).              |
| ARAD1C00242g | 11 | gnl TC-DB P07921 | 2.A.1.1 | Lactose permease - <i>Kluyveromyces lactis</i> (Yeast).                                               |
| ARAD1D12012g | 12 | gnl TC-DB P07921 | 2.A.1.1 | Lactose permease - <i>Kluyveromyces lactis</i> (Yeast).                                               |
| ARAD1A11792g | 11 | gnl TC-DB P07921 | 2.A.1.1 | Lactose permease - <i>Kluyveromyces lactis</i> (Yeast).                                               |
| ARAD1B20438g | 10 | gnl TC-DB P07921 | 2.A.1.1 | Lactose permease - <i>Kluyveromyces lactis</i> (Yeast).                                               |
| ARAD1C00264g | 12 | gnl TC-DB P15685 | 2.A.1.1 | Maltose permease MAL6T - <i>Saccharomyces cerevisiae</i> (Baker's yeast).                             |
| ARAD1D35728g | 12 | gnl TC-DB P15685 | 2.A.1.1 | Maltose permease MAL6T - <i>Saccharomyces cerevisiae</i> (Baker's yeast).                             |
| ARAD1A07150g | 11 | gnl TC-DB P15685 | 2.A.1.1 | Maltose permease MAL6T - <i>Saccharomyces cerevisiae</i> (Baker's yeast).                             |
| ARAD1D09658g | 12 | gnl TC-DB P15685 | 2.A.1.1 | Maltose permease MAL6T - <i>Saccharomyces cerevisiae</i> (Baker's yeast).                             |
| ARAD1A09746g | 12 | gnl TC-DB P15685 | 2.A.1.1 | Maltose permease MAL6T - <i>Saccharomyces cerevisiae</i> (Baker's yeast).                             |
| ARAD1C20878g | 10 | gnl TC-DB Q8J0V1 | 2.A.1.1 | Monosaccharide transporter - <i>Aspergillus niger</i> .                                               |
| ARAD1C00396g | 10 | gnl TC-DB Q8J0V1 | 2.A.1.1 | Monosaccharide transporter - <i>Aspergillus niger</i> .                                               |
| ARAD1A00572g | 11 | gnl TC-DB A0ZXK6 | 2.A.1.1 | Monosaccharide transporter - <i>Geosiphon pyriformis</i> .                                            |
| ARAD1D13442g | 12 | gnl TC-DB P30605 | 2.A.1.1 | Myo-inositol transporter 1 - <i>Saccharomyces cerevisiae</i> (Baker's yeast).                         |
| ARAD1C40392g | 12 | gnl TC-DB P30605 | 2.A.1.1 | Myo-inositol transporter 1 - <i>Saccharomyces cerevisiae</i> (Baker's yeast).                         |
| ARAD1C40678g | 12 | gnl TC-DB P30605 | 2.A.1.1 | Myo-inositol transporter 1 - <i>Saccharomyces cerevisiae</i> (Baker's yeast).                         |
| ARAD1C45012g | 12 | gnl TC-DB P11636 | 2.A.1.1 | Quinate permease (Quinate transporter) - <i>Neurospora crassa</i> .                                   |
| ARAD1D50622g | 12 | gnl TC-DB P11636 | 2.A.1.1 | Quinate permease (Quinate transporter) - <i>Neurospora crassa</i> .                                   |
| ARAD1C34342g | 11 | gnl TC-DB P11636 | 2.A.1.1 | Quinate permease (Quinate transporter) - <i>Neurospora crassa</i> .                                   |
| ARAD1C40326g | 12 | gnl TC-DB P11636 | 2.A.1.1 | Quinate permease (Quinate transporter) - <i>Neurospora crassa</i> .                                   |
| ARAD1C05456g | 12 | gnl TC-DB P95908 | 2.A.1.1 | Sugar transporter (sugar transport related protein) - <i>Sulfolobus solfataricus</i> .                |
| ARAD1B10384g | 12 | gnl TC-DB P95908 | 2.A.1.1 | Sugar transporter (sugar transport related protein) - <i>Sulfolobus solfataricus</i> .                |
| ARAD1C25168g | 11 | gnl TC-DB A1Z264 | 2.A.1.1 | Sugar/H+ symporter - <i>Galdieria sulphuraria</i> GN=SPT1 PE=2 SV=1                                   |

|              |    |                  |          |                                                                                                             |
|--------------|----|------------------|----------|-------------------------------------------------------------------------------------------------------------|
| ARAD1C40766g | 11 | gnl TC-DB A1Z264 | 2.A.1.1  | Sugar/H+ symporter - <i>Galdieria sulphuraria</i> GN=SPT1 PE=2 SV=2                                         |
| ARAD1C00440g | 12 | gnl TC-DB Q64L87 | 2.A.1.1  | Xylose facilitator Xylhp (Fragment) - <i>Debaryomyces hansenii</i> (Yeast) ( <i>Torulaspora hansenii</i> ). |
| ARAD1C39600g | 11 | gnl TC-DB Q64L87 | 2.A.1.1  | Xylose facilitator Xylhp (Fragment) - <i>Debaryomyces hansenii</i> (Yeast) ( <i>Torulaspora hansenii</i> ). |
| ARAD1C39094g | 12 | gnl TC-DB Q64L87 | 2.A.1.1  | Xylose facilitator Xylhp (Fragment) - <i>Debaryomyces hansenii</i> (Yeast) ( <i>Torulaspora hansenii</i> ). |
| ARAD1D18194g | 11 | gnl TC-DB Q64L87 | 2.A.1.1  | Xylose facilitator Xylhp (Fragment) - <i>Debaryomyces hansenii</i> (Yeast) ( <i>Torulaspora hansenii</i> ). |
| ARAD1C00220g | 12 | gnl TC-DB Q64L87 | 2.A.1.1  | Xylose facilitator Xylhp (Fragment) - <i>Debaryomyces hansenii</i> (Yeast) ( <i>Torulaspora hansenii</i> ). |
| ARAD1D10120g | 12 | gnl TC-DB Q64L87 | 2.A.1.1  | Xylose facilitator Xylhp (Fragment) - <i>Debaryomyces hansenii</i> (Yeast) ( <i>Torulaspora hansenii</i> ). |
| ARAD1C29898g | 11 | gnl TC-DB Q51330 | 2.A.1.11 | Oxalate:formate antiport protein - <i>Oxalobacter formigenes</i> .                                          |
| ARAD1D14168g | 11 | gnl TC-DB P36035 | 2.A.1.12 | Carboxylic acid transporter protein homolog - <i>Saccharomyces cerevisiae</i> (Baker's yeast).              |
| ARAD1D34804g | 10 | gnl TC-DB P36035 | 2.A.1.12 | Carboxylic acid transporter protein homolog - <i>Saccharomyces cerevisiae</i> (Baker's yeast).              |
| ARAD1D47432g | 10 | gnl TC-DB P36035 | 2.A.1.12 | Carboxylic acid transporter protein homolog - <i>Saccharomyces cerevisiae</i> (Baker's yeast).              |
| ARAD1C08008g | 11 | gnl TC-DB P36035 | 2.A.1.12 | Carboxylic acid transporter protein homolog - <i>Saccharomyces cerevisiae</i> (Baker's yeast).              |
| ARAD1B13464g | 12 | gnl TC-DB Q08777 | 2.A.1.13 | Putative monocarboxylate permease YOR306c - <i>Saccharomyces cerevisiae</i> (Baker's yeast).                |
| ARAD1D17842g | 12 | gnl TC-DB Q08777 | 2.A.1.13 | Putative monocarboxylate permease YOR306c - <i>Saccharomyces cerevisiae</i> (Baker's yeast).                |
| ARAD1D27170g | 12 | gnl TC-DB Q08777 | 2.A.1.13 | Putative monocarboxylate permease YOR306c - <i>Saccharomyces cerevisiae</i> (Baker's yeast).                |
| ARAD1C10824g | 12 | gnl TC-DB Q08777 | 2.A.1.13 | Putative monocarboxylate permease YOR306c - <i>Saccharomyces cerevisiae</i> (Baker's yeast).                |
| ARAD1C14718g | 11 | gnl TC-DB Q08777 | 2.A.1.13 | Putative monocarboxylate permease YOR306c - <i>Saccharomyces cerevisiae</i> (Baker's yeast).                |
| ARAD1D17292g | 11 | gnl TC-DB Q08777 | 2.A.1.13 | Putative monocarboxylate permease YOR306c - <i>Saccharomyces cerevisiae</i> (Baker's yeast).                |
| ARAD1D36124g | 12 | gnl TC-DB Q08777 | 2.A.1.13 | Putative monocarboxylate permease YOR306c - <i>Saccharomyces cerevisiae</i> (Baker's yeast).                |
| ARAD1D49390g | 12 | gnl TC-DB Q08777 | 2.A.1.13 | Putative monocarboxylate permease YOR306c - <i>Saccharomyces cerevisiae</i> (Baker's yeast).                |
| ARAD1C00176g | 9  | gnl TC-DB P15365 | 2.A.1.14 | Allantoate permease - <i>Saccharomyces cerevisiae</i> (Baker's yeast).                                      |
| ARAD1A13354g | 12 | gnl TC-DB P15365 | 2.A.1.14 | Allantoate permease - <i>Saccharomyces cerevisiae</i> (Baker's yeast).                                      |
| ARAD1A19030g | 12 | gnl TC-DB P15365 | 2.A.1.14 | Allantoate permease - <i>Saccharomyces cerevisiae</i> (Baker's yeast).                                      |
| ARAD1C20218g | 10 | gnl TC-DB P15365 | 2.A.1.14 | Allantoate permease - <i>Saccharomyces cerevisiae</i> (Baker's yeast).                                      |
| ARAD1B22616g | 10 | gnl TC-DB P15365 | 2.A.1.14 | Allantoate permease - <i>Saccharomyces cerevisiae</i> (Baker's yeast).                                      |
| ARAD1C11858g | 12 | gnl TC-DB P15365 | 2.A.1.14 | Allantoate permease - <i>Saccharomyces cerevisiae</i> (Baker's yeast).                                      |
| ARAD1A16742g | 11 | gnl TC-DB P53322 | 2.A.1.14 | High-affinity nicotinic acid transporter - <i>Saccharomyces cerevisiae</i> (Baker's yeast).                 |
| ARAD1C12562g | 10 | gnl TC-DB P53322 | 2.A.1.14 | High-affinity nicotinic acid transporter - <i>Saccharomyces cerevisiae</i> (Baker's yeast).                 |
| ARAD1C20174g | 12 | gnl TC-DB P53322 | 2.A.1.14 | High-affinity nicotinic acid transporter - <i>Saccharomyces cerevisiae</i> (Baker's yeast).                 |
| ARAD1D30976g | 12 | gnl TC-DB P53322 | 2.A.1.14 | High-affinity nicotinic acid transporter - <i>Saccharomyces cerevisiae</i> (Baker's yeast).                 |
| ARAD1C04268g | 12 | gnl TC-DB P53322 | 2.A.1.14 | High-affinity nicotinic acid transporter - <i>Saccharomyces cerevisiae</i> (Baker's yeast).                 |
| ARAD1B08778g | 12 | gnl TC-DB P53322 | 2.A.1.14 | High-affinity nicotinic acid transporter - <i>Saccharomyces cerevisiae</i> (Baker's yeast).                 |
| ARAD1A14652g | 10 | gnl TC-DB O43000 | 2.A.1.14 | Pantothenate transporter liz1 - <i>Schizosaccharomyces pombe</i> (Fission yeast).                           |
| ARAD1C35992g | 7  | gnl TC-DB P70786 | 2.A.1.14 | Putative tartrate transporter - <i>Agrobacterium vitis</i> .                                                |
| ARAD1B06138g | 8  | gnl TC-DB P70786 | 2.A.1.14 | Putative tartrate transporter - <i>Agrobacterium vitis</i> .                                                |
| ARAD1D08558g | 12 | gnl TC-DB P70786 | 2.A.1.14 | Putative tartrate transporter - <i>Agrobacterium vitis</i> .                                                |
| ARAD1A08228g | 12 | gnl TC-DB P53241 | 2.A.1.14 | Vitamin H transporter (H+/biotin symporter) - <i>Saccharomyces cerevisiae</i> (Baker's yeast).              |
| ARAD1C26906g | 11 | gnl TC-DB O13880 | 2.A.1.14 | Vitamin H transporter 1 - <i>Schizosaccharomyces pombe</i> (Fission yeast).                                 |
| ARAD1D50908g | 8  | gnl TC-DB O24842 | 2.A.1.15 | Hypothetical 47.9                                                                                           |

|              |    |                  |          |                                                                                            |
|--------------|----|------------------|----------|--------------------------------------------------------------------------------------------|
| ARAD1D48356g | 14 | gnl TC-DB Q08299 | 2.A.1.16 | Ferric enterobactin transporter YOL158c - <i>Saccharomyces cerevisiae</i> (baker's yeast). |
| ARAD1C11330g | 13 | gnl TC-DB P39980 | 2.A.1.16 | Ferrioxamine B transporter YEL065W - <i>Saccharomyces cerevisiae</i>                       |
| ARAD1D51018g | 13 | gnl TC-DB P39980 | 2.A.1.16 | Ferrioxamine B transporter YEL065W - <i>Saccharomyces cerevisiae</i>                       |
| ARAD1D11704g | 13 | gnl TC-DB P38731 | 2.A.1.16 | Transporter of the ARN family that specifically recognizes siderophore iron chelates       |
| ARAD1A16852g | 14 | gnl TC-DB P38724 | 2.A.1.16 | Transporter of the ARN family that specifically recognizes siderophore iron chelates       |
| ARAD1C34078g | 14 | gnl TC-DB P38724 | 2.A.1.16 | Transporter of the ARN family that specifically recognizes siderophore iron chelates       |
| ARAD1C19514g | 11 | gnl TC-DB O35956 | 2.A.1.19 | Renal organic anion transport protein 1 - <i>Rattus norvegicus</i> (rat).                  |
| ARAD1D12672g | 11 | gnl TC-DB P28873 | 2.A.1.2  | Benomyl/methotrexate resistance protein - <i>Candida albicans</i> (Yeast).                 |
| ARAD1D12694g | 11 | gnl TC-DB P28873 | 2.A.1.2  | Benomyl/methotrexate resistance protein - <i>Candida albicans</i> (Yeast).                 |
| ARAD1D46156g | 12 | gnl TC-DB P32071 | 2.A.1.2  | Cycloheximide resistance protein - <i>Candida maltosa</i> (Yeast).                         |
| ARAD1D18546g | 12 | gnl TC-DB P32071 | 2.A.1.2  | Cycloheximide resistance protein - <i>Candida maltosa</i> (Yeast).                         |
| ARAD1D22176g | 12 | gnl TC-DB P32071 | 2.A.1.2  | Cycloheximide resistance protein - <i>Candida maltosa</i> (Yeast).                         |
| ARAD1D27918g | 10 | gnl TC-DB P32071 | 2.A.1.2  | Cycloheximide resistance protein - <i>Candida maltosa</i> (Yeast).                         |
| ARAD1C13860g | 12 | gnl TC-DB Q9KMQ3 | 2.A.1.2  | Multidrug resistance protein [ <i>Vibrio cholerae</i> ]                                    |
| ARAD1C11352g | 12 | gnl TC-DB Q9KMQ3 | 2.A.1.2  | Multidrug resistance protein [ <i>Vibrio cholerae</i> ]                                    |
| ARAD1A19800g | 12 | gnl TC-DB Q07824 | 2.A.1.2  | Polyamine transporter YLL028W - <i>Saccharomyces cerevisiae</i> (Baker's yeast).           |
| ARAD1A03938g | 12 | gnl TC-DB Q07824 | 2.A.1.2  | Polyamine transporter YLL028W - <i>Saccharomyces cerevisiae</i> (Baker's yeast).           |
| ARAD1D24970g | 12 | gnl TC-DB Q07824 | 2.A.1.2  | Polyamine transporter YLL028W - <i>Saccharomyces cerevisiae</i> (Baker's yeast).           |
| ARAD1D27214g | 10 | gnl TC-DB Q07824 | 2.A.1.2  | Polyamine transporter YLL028W - <i>Saccharomyces cerevisiae</i> (Baker's yeast).           |
| ARAD1B15224g | 12 | gnl TC-DB Q07824 | 2.A.1.2  | Polyamine transporter YLL028W - <i>Saccharomyces cerevisiae</i> (Baker's yeast).           |
| ARAD1A19448g | 12 | gnl TC-DB Q07824 | 2.A.1.2  | Polyamine transporter YLL028W - <i>Saccharomyces cerevisiae</i> (Baker's yeast).           |
| ARAD1B07260g | 10 | gnl TC-DB Q07824 | 2.A.1.2  | Polyamine transporter YLL028W - <i>Saccharomyces cerevisiae</i> (Baker's yeast).           |
| ARAD1B15048g | 12 | gnl TC-DB Q07824 | 2.A.1.2  | Polyamine transporter YLL028W - <i>Saccharomyces cerevisiae</i> (Baker's yeast).           |
| ARAD1D02772g | 12 | gnl TC-DB Q07824 | 2.A.1.2  | Polyamine transporter YLL028W - <i>Saccharomyces cerevisiae</i> (Baker's yeast).           |
| ARAD1A19096g | 12 | gnl TC-DB Q07824 | 2.A.1.2  | Polyamine transporter YLL028W - <i>Saccharomyces cerevisiae</i> (Baker's yeast).           |
| ARAD1D01100g | 12 | gnl TC-DB Q07824 | 2.A.1.2  | Polyamine transporter YLL028W - <i>Saccharomyces cerevisiae</i> (Baker's yeast).           |
| ARAD1C32472g | 12 | gnl TC-DB Q07824 | 2.A.1.2  | Polyamine transporter YLL028W - <i>Saccharomyces cerevisiae</i> (Baker's yeast).           |
| ARAD1C36806g | 11 | gnl TC-DB Q07824 | 2.A.1.2  | Polyamine transporter YLL028W - <i>Saccharomyces cerevisiae</i> (Baker's yeast).           |
| ARAD1C37686g | 10 | gnl TC-DB Q07824 | 2.A.1.2  | Polyamine transporter YLL028W - <i>Saccharomyces cerevisiae</i> (Baker's yeast).           |
| ARAD1C09394g | 10 | gnl TC-DB Q07824 | 2.A.1.2  | Polyamine transporter YLL028W - <i>Saccharomyces cerevisiae</i> (Baker's yeast).           |
| ARAD1B01628g | 12 | gnl TC-DB P53389 | 2.A.1.2  | Protein HOL1 - <i>Saccharomyces cerevisiae</i> (Baker's yeast).                            |
| ARAD1D28314g | 10 | gnl TC-DB P53389 | 2.A.1.2  | Protein HOL1 - <i>Saccharomyces cerevisiae</i> (Baker's yeast).                            |
| ARAD1C17402g | 12 | gnl TC-DB P53389 | 2.A.1.2  | Protein HOL1 - <i>Saccharomyces cerevisiae</i> (Baker's yeast).                            |
| ARAD1D18524g | 9  | gnl TC-DB P53389 | 2.A.1.2  | Protein HOL1 - <i>Saccharomyces cerevisiae</i> (Baker's yeast).                            |
| ARAD1A15356g | 11 | gnl TC-DB P53389 | 2.A.1.2  | Protein HOL1 - <i>Saccharomyces cerevisiae</i> (Baker's yeast).                            |
| ARAD1D17336g | 12 | gnl TC-DB P53389 | 2.A.1.2  | Protein HOL1 - <i>Saccharomyces cerevisiae</i> (Baker's yeast).                            |
| ARAD1C17094g | 10 | gnl TC-DB P53389 | 2.A.1.2  | Protein HOL1 - <i>Saccharomyces cerevisiae</i> (Baker's yeast).                            |
| ARAD1D06226g | 12 | gnl TC-DB P53389 | 2.A.1.2  | Protein HOL1 - <i>Saccharomyces cerevisiae</i> (Baker's yeast).                            |
| ARAD1A18348g | 7  | gnl TC-DB P0A0J7 | 2.A.1.2  | Quinolone resistance protein norA - <i>Staphylococcus aureus</i> .                         |

|              |    |                  |          |                                                                                                      |
|--------------|----|------------------|----------|------------------------------------------------------------------------------------------------------|
| ARAD1D31416g | 11 | gnl TC-DB Q5JAK9 | 2.A.1.2  | TetA(41) - <i>Serratia marcescens</i> GN=tetA(41) PE=4 SV=1                                          |
| ARAD1A13112g | 9  | gnl TC-DB B2YGG2 | 2.A.1.2  | Tetracycline resistance protein [ <i>Micrococcus sp.</i> SMCC G887]                                  |
| ARAD1C21626g | 11 | gnl TC-DB P02982 | 2.A.1.2  | Tetracycline resistance protein, class A (TETA(A)) - <i>Escherichia coli</i> .                       |
| ARAD1C33044g | 12 | gnl TC-DB P38227 | 2.A.1.2  | Uncharacterized transporter YBR043C - <i>Saccharomyces cerevisiae</i>                                |
| ARAD1A18260g | 12 | gnl TC-DB P38125 | 2.A.1.2  | Uncharacterized transporter YBR180W - <i>Saccharomyces cerevisiae</i>                                |
| ARAD1D36146g | 11 | gnl TC-DB P40474 | 2.A.1.2  | Uncharacterized transporter YIL121W - <i>Saccharomyces cerevisiae</i> (Baker's yeast).               |
| ARAD1B13662g | 10 | gnl TC-DB P40474 | 2.A.1.2  | Uncharacterized transporter YIL121W - <i>Saccharomyces cerevisiae</i> (Baker's yeast).               |
| ARAD1D02948g | 11 | gnl TC-DB Q02563 | 2.A.1.22 | Synaptic vesicle protein 2 (SV2) - <i>Rattus norvegicus</i> (Rat).                                   |
| ARAD1C35530g | 10 | gnl TC-DB Q02563 | 2.A.1.22 | Synaptic vesicle protein 2 (SV2) - <i>Rattus norvegicus</i> (Rat).                                   |
| ARAD1D35860g | 10 | gnl TC-DB P25568 | 2.A.1.24 | Hypothetical 58.8                                                                                    |
| ARAD1C23496g | 10 | gnl TC-DB P25568 | 2.A.1.24 | Hypothetical 58.8                                                                                    |
| ARAD1D28864g | 8  | gnl TC-DB O00400 | 2.A.1.25 | Acetyl-coenzyme A transporter - <i>Homo sapiens</i> (human).                                         |
| ARAD1B19778g | 12 | gnl TC-DB Q8CE47 | 2.A.1.28 | Major facilitator superfamily domain-containing protein 7 - <i>Mus musculus</i> (Mouse).             |
| ARAD1D20108g | 14 | gnl TC-DB P13090 | 2.A.1.3  | Aminotriazole resistance protein - <i>Saccharomyces cerevisiae</i> (Baker's yeast).                  |
| ARAD1D01320g | 12 | gnl TC-DB P13090 | 2.A.1.3  | Aminotriazole resistance protein - <i>Saccharomyces cerevisiae</i> (Baker's yeast).                  |
| ARAD1B22836g | 14 | gnl TC-DB P13090 | 2.A.1.3  | Aminotriazole resistance protein - <i>Saccharomyces cerevisiae</i> (Baker's yeast).                  |
| ARAD1C13750g | 10 | gnl TC-DB P32369 | 2.A.1.3  | Bile acid transporter - <i>Eubacterium sp.</i> (strain VPI 12708).                                   |
| ARAD1B14916g | 14 | gnl TC-DB Q9ZGB6 | 2.A.1.3  | Drug resistance transporter LanJ [ <i>Streptomyces cyanogenus</i> ]                                  |
| ARAD1B04334g | 14 | gnl TC-DB Q9ZGB6 | 2.A.1.3  | Drug resistance transporter LanJ [ <i>Streptomyces cyanogenus</i> ]                                  |
| ARAD1D20680g | 14 | gnl TC-DB P42670 | 2.A.1.3  | Puromycin resistance protein pur8 - <i>Streptomyces lipmanii</i> ( <i>Streptomyces alboniger</i> ).  |
| ARAD1D14058g | 13 | gnl TC-DB O69070 | 2.A.1.3  | Tetracycline efflux protein - <i>Streptomyces rimosus</i> .                                          |
| ARAD1B22814g | 14 | gnl TC-DB O32182 | 2.A.1.3  | Uncharacterized MFS-type transporter yusP - <i>Bacillus subtilis</i>                                 |
| ARAD1D40678g | 11 | gnl TC-DB O75387 | 2.A.1.44 | Large neutral amino acids transporter small subunit 3 - <i>Homo sapiens</i> (Human).                 |
| ARAD1C44066g | 13 | gnl TC-DB Q09752 | 2.A.1.48 | Multidrug resistance protein fnx1 - <i>Schizosaccharomyces pombe</i> (Fission yeast).                |
| ARAD1C21362g | 12 | gnl TC-DB Q5A7S4 | 2.A.1.58 | Putative uncharacterized protein - <i>Candida albicans</i> (Yeast).                                  |
| ARAD1D00946g | 11 | gnl TC-DB Q5A7S4 | 2.A.1.58 | Putative uncharacterized protein - <i>Candida albicans</i> (Yeast).                                  |
| ARAD1D31658g | 10 | gnl TC-DB Q5A7S4 | 2.A.1.58 | Putative uncharacterized protein - <i>Candida albicans</i> (Yeast).                                  |
| ARAD1D03124g | 9  | gnl TC-DB Q467Y6 | 2.A.1.63 | Transport protein - <i>Methanosarcina barkeri</i> (strain Fusaro / DSM 804).                         |
| ARAD1C16346g | 12 | gnl TC-DB Q07W00 | 2.A.1.7  | Major facilitator superfamily MFS_1 - <i>Shewanella frigidimarina</i> (strain NCIMB 400).            |
| ARAD1B04554g | 12 | gnl TC-DB Q07W00 | 2.A.1.7  | Major facilitator superfamily MFS_1 - <i>Shewanella frigidimarina</i> (strain NCIMB 400).            |
| ARAD1C19250g | 10 | gnl TC-DB P22152 | 2.A.1.8  | Nitrate transporter (Nitrate permease) - <i>Emericella nidulans</i> ( <i>Aspergillus nidulans</i> ). |
| ARAD1C27632g | 9  | gnl TC-DB P22152 | 2.A.1.8  | Nitrate transporter (Nitrate permease) - <i>Emericella nidulans</i> ( <i>Aspergillus nidulans</i> ). |
| ARAD1C19206g | 8  | gnl TC-DB P22152 | 2.A.1.8  | Nitrate transporter (Nitrate permease) - <i>Emericella nidulans</i> ( <i>Aspergillus nidulans</i> ). |
| ARAD1D22352g | 10 | gnl TC-DB Q01MW8 | 2.A.1.9  | Probable inorganic phosphate transporter 1-4 - <i>Oryza sativa subsp. indica</i>                     |
| ARAD1A19360g | 9  | gnl TC-DB Q01MW8 | 2.A.1.9  | Probable inorganic phosphate transporter 1-4 - <i>Oryza sativa subsp. indica</i>                     |
| ARAD1D45606g | 8  | gnl TC-DB Q01MW8 | 2.A.1.9  | Probable inorganic phosphate transporter 1-4 - <i>Oryza sativa subsp. indica</i>                     |
| ARAD1A09416g | 8  | gnl TC-DB A2QYD7 | 2.A.16.4 | Plasma membrane free sulphite efflux pump Ssu1p - <i>Aspergillus niger</i> .                         |
| ARAD1D03740g | 11 | gnl TC-DB P32901 | 2.A.17.2 | Peptide transporter Ptr2 (peptide permease Ptr2) - <i>Saccharomyces cerevisiae</i>                   |
| ARAD1C43318g | 11 | gnl TC-DB P32901 | 2.A.17.2 | Peptide transporter Ptr2 (peptide permease Ptr2) - <i>Saccharomyces cerevisiae</i>                   |

|              |    |                  |           |                                                                                                                |
|--------------|----|------------------|-----------|----------------------------------------------------------------------------------------------------------------|
| ARAD1A19910g | 11 | gnl TC-DB Q6IT47 | 2.A.18.4  | Aromatic and neutral aliphatic amino acid permease - <i>Penicillium chrysogenum</i>                            |
| ARAD1D06270g | 9  | gnl TC-DB Q6IT47 | 2.A.18.4  | Aromatic and neutral aliphatic amino acid permease - <i>Penicillium chrysogenum</i>                            |
| ARAD1A14564g | 11 | gnl TC-DB Q6IT47 | 2.A.18.4  | Aromatic and neutral aliphatic amino acid permease - <i>Penicillium chrysogenum</i>                            |
| ARAD1D29084g | 11 | gnl TC-DB P38680 | 2.A.18.4  | N amino acid transport system protein (Methyltryptophan resistance) - <i>Neurospora crassa</i> .               |
| ARAD1A06578g | 11 | gnl TC-DB P47082 | 2.A.18.5  | Hypothetical 65.3                                                                                              |
| ARAD1C44528g | 11 | gnl TC-DB Q91XR7 | 2.A.18.6  | Amino acid transporter system N2 - <i>Rattus norvegicus</i> (Rat).                                             |
| ARAD1B21538g | 10 | gnl TC-DB P40074 | 2.A.18.6  | Hypothetical 48.8                                                                                              |
| ARAD1D35376g | 11 | gnl TC-DB P36062 | 2.A.18.7  | Hypothetical 75.5                                                                                              |
| ARAD1B22440g | 11 | gnl TC-DB Q99385 | 2.A.19.2  | Vacuolar H <sup>+</sup> /Ca <sup>++</sup> exchanger YDL128W - <i>Saccharomyces cerevisiae</i> (Baker's yeast). |
| ARAD1D46904g | 11 | gnl TC-DB Q6J4K2 | 2.A.19.4  | Sodium/potassium/calcium exchanger 6 - <i>Homo sapiens</i>                                                     |
| ARAD1D30162g | 13 | gnl TC-DB P42839 | 2.A.19.7  | Putative cation exchanger YNL321W - <i>Saccharomyces cerevisiae</i> (Baker's yeast).                           |
| ARAD1B10142g | 12 | gnl TC-DB O14091 | 2.A.2.6   | Hypothetical 61.7                                                                                              |
| ARAD1C07238g | 12 | gnl TC-DB O14091 | 2.A.2.6   | Hypothetical 61.7                                                                                              |
| ARAD1D06468g | 9  | gnl TC-DB P15710 | 2.A.20.2  | Phosphate-repressible phosphate permease - <i>Neurospora crassa</i> .                                          |
| ARAD1B12386g | 11 | gnl TC-DB P33413 | 2.A.21.6  | Urea active transporter - <i>Saccharomyces cerevisiae</i> (baker's yeast).                                     |
| ARAD1D16852g | 15 | gnl TC-DB P33413 | 2.A.21.6  | Urea active transporter - <i>Saccharomyces cerevisiae</i> (baker's yeast).                                     |
| ARAD1D41294g | 3  | gnl TC-DB Q93N33 | 2.A.21.9  | Proline sensor PrIS - <i>Aeromonas hydrophila</i> .                                                            |
| ARAD1C09284g | 3  | gnl TC-DB Q93N33 | 2.A.21.9  | Proline sensor PrIS - <i>Aeromonas hydrophila</i> .                                                            |
| ARAD1B19668g | 3  | gnl TC-DB P18239 | 2.A.29.1  | ADP,ATP carrier protein 2 - <i>Saccharomyces cerevisiae</i> (Baker's yeast).                                   |
| ARAD1D08272g | 3  | gnl TC-DB Q9H2D1 | 2.A.29.10 | Folate transporter/carrier - <i>Homo sapiens</i> (human).                                                      |
| ARAD1D13002g | 2  | gnl TC-DB Q01888 | 2.A.29.12 | Mitochondrial solute carrier protein homolog - <i>Bos taurus</i>                                               |
| ARAD1B21252g | 4  | gnl TC-DB Q06497 | 2.A.29.17 | Similar to mitochondrial ADP/ATP carrier protein - <i>Saccharomyces cerevisiae</i>                             |
| ARAD1C04466g | 3  | gnl TC-DB Q06497 | 2.A.29.17 | Similar to mitochondrial ADP/ATP carrier protein - <i>Saccharomyces cerevisiae</i>                             |
| ARAD1B10318g | 3  | gnl TC-DB Q94AG6 | 2.A.29.18 | Putative mitochondrial carrier protein - <i>Arabidopsis thaliana</i> (Mouse-ear cress).                        |
| ARAD1D34716g | 2  | gnl TC-DB P38921 | 2.A.29.18 | Putative mitochondrial carrier protein PET8 - <i>Saccharomyces cerevisiae</i> (Baker's yeast).                 |
| ARAD1A09922g | 4  | gnl TC-DB P38921 | 2.A.29.18 | Putative mitochondrial carrier protein PET8 - <i>Saccharomyces cerevisiae</i> (Baker's yeast).                 |
| ARAD1D29282g | 2  | gnl TC-DB Q99297 | 2.A.29.2  | Putative mitochondrial carrier YOR222W - <i>Saccharomyces cerevisiae</i> (Baker's yeast).                      |
| ARAD1B01958g | 4  | gnl TC-DB P40556 | 2.A.29.27 | Putative mitochondrial carrier YIL006W - <i>Saccharomyces cerevisiae</i> (Baker's yeast).                      |
| ARAD1C33572g | 2  | gnl TC-DB P40035 | 2.A.29.4  | Mitochondrial phosphate carrier protein 2 - <i>Saccharomyces cerevisiae</i>                                    |
| ARAD1C39270g | 6  | gnl TC-DB Q00319 | 2.A.29.6  | Peroxisomal membrane protein PMP47B - <i>Candida boidinii</i> (Yeast).                                         |
| ARAD1A10912g | 3  | gnl TC-DB O43772 | 2.A.29.8  | Mitochondrial carnitine/acylcarnitine carrier protein - <i>Homo sapiens</i> (Human).                           |
| ARAD1D36080g | 11 | gnl TC-DB P25737 | 2.A.3.1   | Lysine-specific permease - <i>Escherichia coli</i> .                                                           |
| ARAD1D09482g | 12 | gnl TC-DB P04817 | 2.A.3.10  | Arginine permease - <i>Saccharomyces cerevisiae</i> (Baker's yeast).                                           |
| ARAD1A00550g | 11 | gnl TC-DB P53388 | 2.A.3.10  | Dicarboxylic amino acid permease - <i>Saccharomyces cerevisiae</i> (Baker's yeast).                            |
| ARAD1A11946g | 12 | gnl TC-DB P43548 | 2.A.3.10  | General amino acid permease AGP3 - <i>Saccharomyces cerevisiae</i> (Baker's yeast).                            |
| ARAD1D17600g | 11 | gnl TC-DB P19145 | 2.A.3.10  | General amino-acid permease GAP1 - <i>Saccharomyces cerevisiae</i> (Baker's yeast).                            |
| ARAD1A19228g | 12 | gnl TC-DB P19145 | 2.A.3.10  | General amino-acid permease GAP1 - <i>Saccharomyces cerevisiae</i> (Baker's yeast).                            |
| ARAD1C04070g | 12 | gnl TC-DB P19145 | 2.A.3.10  | General amino-acid permease GAP1 - <i>Saccharomyces cerevisiae</i> (Baker's yeast).                            |
| ARAD1A02376g | 11 | gnl TC-DB P15380 | 2.A.3.10  | Proline-specific permease - <i>Saccharomyces cerevisiae</i> (Baker's yeast).                                   |

|              |    |                  |          |                                                                                        |
|--------------|----|------------------|----------|----------------------------------------------------------------------------------------|
| ARAD1B00352g | 11 | gnl TC-DB P15380 | 2.A.3.10 | Proline-specific permease - <i>Saccharomyces cerevisiae</i> (Baker's yeast).           |
| ARAD1D24222g | 11 | gnl TC-DB Q03770 | 2.A.3.10 | Putative amino-acid permease SSY1 - <i>Saccharomyces cerevisiae</i> (Baker's yeast).   |
| ARAD1D20878g | 12 | gnl TC-DB Q9Y860 | 2.A.3.4  | GABA permease - <i>Emericella nidulans</i> ( <i>Aspergillus nidulans</i> ).            |
| ARAD1D20900g | 10 | gnl TC-DB Q9Y860 | 2.A.3.4  | GABA permease - <i>Emericella nidulans</i> ( <i>Aspergillus nidulans</i> ).            |
| ARAD1D49984g | 11 | gnl TC-DB Q9Y860 | 2.A.3.4  | GABA permease - <i>Emericella nidulans</i> ( <i>Aspergillus nidulans</i> ).            |
| ARAD1D12584g | 12 | gnl TC-DB Q9Y860 | 2.A.3.4  | GABA permease - <i>Emericella nidulans</i> ( <i>Aspergillus nidulans</i> ).            |
| ARAD1D04268g | 12 | gnl TC-DB P32837 | 2.A.3.4  | GABA-specific permease - <i>Saccharomyces cerevisiae</i> (Baker's yeast).              |
| ARAD1D15884g | 12 | gnl TC-DB P32837 | 2.A.3.4  | GABA-specific permease - <i>Saccharomyces cerevisiae</i> (Baker's yeast).              |
| ARAD1B20746g | 12 | gnl TC-DB P32837 | 2.A.3.4  | GABA-specific permease - <i>Saccharomyces cerevisiae</i> (Baker's yeast).              |
| ARAD1D45210g | 12 | gnl TC-DB P32837 | 2.A.3.4  | GABA-specific permease - <i>Saccharomyces cerevisiae</i> (Baker's yeast).              |
| ARAD1C11814g | 12 | gnl TC-DB P32837 | 2.A.3.4  | GABA-specific permease - <i>Saccharomyces cerevisiae</i> (Baker's yeast).              |
| ARAD1D08074g | 12 | gnl TC-DB Q9UT18 | 2.A.3.4  | Uncharacterized amino-acid permease C9.10                                              |
| ARAD1A06600g | 10 | gnl TC-DB P82252 | 2.A.3.8  | B(0,+)-type amino acid transporter 1 - <i>Rattus norvegicus</i> (Rat).                 |
| ARAD1D28292g | 12 | gnl TC-DB P50276 | 2.A.3.8  | High affinity methionine permease - <i>Saccharomyces cerevisiae</i> (Baker's yeast).   |
| ARAD1C23914g | 9  | gnl TC-DB O22526 | 2.A.30.6 | Cation-chloride co-transporter - <i>Nicotiana tabacum</i> (common tobacco).            |
| ARAD1C19030g | 12 | gnl TC-DB P53838 | 2.A.31.3 | Boron efflux transporter - <i>Saccharomyces cerevisiae</i> (Baker's yeast).            |
| ARAD1C09856g | 10 | gnl TC-DB Q04121 | 2.A.36.2 | Mitochondrial NA(+)/H(+) exchanger - <i>Saccharomyces cerevisiae</i> (Baker's yeast).  |
| ARAD1C36938g | 10 | gnl TC-DB Q9P937 | 2.A.36.4 | Na <sup>+</sup> /H <sup>+</sup> antiporter Cnh1 - <i>Candida albicans</i> (Yeast).     |
| ARAD1D28578g | 10 | gnl TC-DB Q9P937 | 2.A.36.4 | Na <sup>+</sup> /H <sup>+</sup> antiporter Cnh1 - <i>Candida albicans</i> (Yeast).     |
| ARAD1D02706g | 12 | gnl TC-DB P40309 | 2.A.37.4 | Hypothetical 97.1                                                                      |
| ARAD1C44154g | 6  | gnl TC-DB Q6BYD8 | 2.A.38.2 | DhTRK1 protein - <i>Debaryomyces hansenii</i> (Yeast) ( <i>Torulaspora hansenii</i> ). |
| ARAD1B15598g | 6  | gnl TC-DB Q6BYD8 | 2.A.38.2 | DhTRK1 protein - <i>Debaryomyces hansenii</i> (Yeast) ( <i>Torulaspora hansenii</i> ). |
| ARAD1D48642g | 12 | gnl TC-DB Q708J7 | 2.A.39.2 | Putative purine-cytosine permease - <i>Candida albicans</i> (Yeast).                   |
| ARAD1B03256g | 12 | gnl TC-DB P53099 | 2.A.39.2 | Tpn1 64.5                                                                              |
| ARAD1A06402g | 12 | gnl TC-DB Q04895 | 2.A.39.3 | Allantoin permease (allantoin transport protein) - <i>Saccharomyces cerevisiae</i>     |
| ARAD1C22902g | 12 | gnl TC-DB Q05998 | 2.A.39.4 | Thiamine transporter - <i>Saccharomyces cerevisiae</i> (baker's yeast).                |
| ARAD1D24618g | 3  | gnl TC-DB O07084 | 2.A.4.1  | Cation transport protein YRDO - <i>Bacillus subtilis</i> .                             |
| ARAD1A12342g | 6  | gnl TC-DB P32798 | 2.A.4.2  | Cobalt uptake protein Cot1 - <i>Saccharomyces cerevisiae</i> (baker's yeast).          |
| ARAD1C14410g | 6  | gnl TC-DB P53735 | 2.A.4.4  | Hypothetical 82.5                                                                      |
| ARAD1B10802g | 12 | gnl TC-DB Q03455 | 2.A.4.4  | Protein ZRG17 - <i>Saccharomyces cerevisiae</i> (Baker's yeast).                       |
| ARAD1A14586g | 5  | gnl TC-DB A4ZUV2 | 2.A.4.5  | Mn-specific cation diffusion facilitator transporter - <i>Populus trichocarpa</i>      |
| ARAD1A08580g | 5  | gnl TC-DB A4ZUV2 | 2.A.4.5  | Mn-specific cation diffusion facilitator transporter - <i>Populus trichocarpa</i>      |
| ARAD1D20966g | 12 | gnl TC-DB P48777 | 2.A.40.5 | Purine permease - <i>Emericella nidulans</i> ( <i>aspergillus nidulans</i> ).          |
| ARAD1D46244g | 12 | gnl TC-DB Q874I3 | 2.A.41.2 | H <sup>+</sup> /nucleoside cotransporter - <i>Candida albicans</i> (Yeast).            |
| ARAD1C07480g | 5  | gnl TC-DB O60931 | 2.A.43.1 | Cystinosisin - <i>Homo sapiens</i> (Human).                                            |
| ARAD1D24464g | 4  | gnl TC-DB Q60441 | 2.A.43.3 | Mannose-P-dolichol utilization defect 1 protein - <i>Cricetulus griseus</i>            |
| ARAD1C43098g | 12 | gnl TC-DB P27514 | 2.A.47.2 | Uncharacterized transporter YNR013C - <i>Saccharomyces cerevisiae</i> (Baker's yeast). |
| ARAD1D30404g | 10 | gnl TC-DB A7LKG1 | 2.A.49.1 | CLC voltage-gated chloride channel - <i>Fusarium oxysporum f. sp. lycopersici</i> .    |
| ARAD1D47938g | 9  | gnl TC-DB Q9GKE7 | 2.A.49.2 | Outwardly rectifying chloride channel - <i>Sus scrofa</i> (Pig).                       |

|              |    |                  |          |                                                                                              |
|--------------|----|------------------|----------|----------------------------------------------------------------------------------------------|
| ARAD1B05742g | 9  | gnl TC-DB Q9GKE7 | 2.A.49.2 | Outwardly rectifying chloride channel - <i>Sus scrofa</i> (Pig).                             |
| ARAD1D26268g | 7  | gnl TC-DB P32804 | 2.A.5.1  | Zinc transporter ZRT1 Protein - <i>Saccharomyces cerevisiae</i> (Baker's yeast).             |
| ARAD1D26290g | 7  | gnl TC-DB P32804 | 2.A.5.1  | Zinc transporter ZRT1 Protein - <i>Saccharomyces cerevisiae</i> (Baker's yeast).             |
| ARAD1A06138g | 7  | gnl TC-DB P32804 | 2.A.5.1  | Zinc transporter ZRT1 Protein - <i>Saccharomyces cerevisiae</i> (Baker's yeast).             |
| ARAD1A07678g | 7  | gnl TC-DB P32804 | 2.A.5.1  | Zinc transporter ZRT1 Protein - <i>Saccharomyces cerevisiae</i> (Baker's yeast).             |
| ARAD1C28468g | 4  | gnl TC-DB P40544 | 2.A.5.4  | Zinc transporter YKE4 - <i>Saccharomyces cerevisiae</i> (Baker's yeast).                     |
| ARAD1C06380g | 7  | gnl TC-DB P0A8H3 | 2.A.5.5  | Zinc transporter zupT - <i>Escherichia coli</i> .                                            |
| ARAD1C19338g | 11 | gnl TC-DB P53154 | 2.A.50.1 | Hypothetical 65.3                                                                            |
| ARAD1B18326g | 9  | gnl TC-DB P38359 | 2.A.53.1 | Sulfate transporter 1 (high-affinity) - <i>Saccharomyces cerevisiae</i> (baker's yeast).     |
| ARAD1B08954g | 9  | gnl TC-DB Q9SAY1 | 2.A.53.1 | Sulfate transporter 1.1                                                                      |
| ARAD1B20284g | 11 | gnl TC-DB Q09764 | 2.A.53.7 | Hypothetical protein C24H6.11c in chromosome I - <i>Schizosaccharomyces pombe</i>            |
| ARAD1D30580g | 4  | gnl TC-DB Q63965 | 2.A.54.1 | Tricarboxylate carrier (fragment) - <i>Rattus norvegicus</i> (rat).                          |
| ARAD1C27698g | 11 | gnl TC-DB P38778 | 2.A.55.1 | Transporter protein Smf1/Esp1 - <i>Saccharomyces cerevisiae</i> (baker's yeast).             |
| ARAD1C06358g | 11 | gnl TC-DB P38925 | 2.A.55.1 | Transporter protein Smf1/Esp1 - <i>Saccharomyces cerevisiae</i> (baker's yeast).             |
| ARAD1D09812g | 11 | gnl TC-DB P31381 | 2.A.57.3 | Nucleoside transporter Fun26 - <i>Saccharomyces cerevisiae</i> (baker's yeast).              |
| ARAD1D45496g | 10 | gnl TC-DB P45946 | 2.A.59.1 | Hypothetical protein yqcL - <i>Bacillus subtilis</i> .                                       |
| ARAD1D41008g | 6  | gnl TC-DB P04035 | 2.A.6.6  | 3-hydroxy-3-methylglutaryl-coenzyme A reductase - <i>Homo sapiens</i> (human).               |
| ARAD1D13640g | 12 | gnl TC-DB Q12200 | 2.A.6.6  | Hypothetical 132.6                                                                           |
| ARAD1D41470g | 8  | gnl TC-DB P97260 | 2.A.6.6  | SREBP cleavage activating protein - <i>Cricetulus griseus</i> (Chinese hamster).             |
| ARAD1D09042g | 12 | gnl TC-DB P38767 | 2.A.66.1 | Hypothetical 64.2                                                                            |
| ARAD1D22022g | 10 | gnl TC-DB P38767 | 2.A.66.1 | Hypothetical 64.2                                                                            |
| ARAD1D11110g | 10 | gnl TC-DB P38206 | 2.A.66.3 | Nuclear division RFT1 protein - <i>Saccharomyces cerevisiae</i> (Baker's yeast).             |
| ARAD1A01166g | 15 | gnl TC-DB O14411 | 2.A.67.1 | OPT1P - <i>Candida albicans</i> (Yeast).                                                     |
| ARAD1B01254g | 13 | gnl TC-DB Q06593 | 2.A.67.1 | Hypothetical Protein HRD799 - <i>Saccharomyces cerevisiae</i> (Baker's yeast).               |
| ARAD1B14564g | 12 | gnl TC-DB Q06593 | 2.A.67.1 | Hypothetical Protein HRD799 - <i>Saccharomyces cerevisiae</i> (Baker's yeast).               |
| ARAD1B01540g | 11 | gnl TC-DB Q06593 | 2.A.67.1 | Hypothetical Protein HRD799 - <i>Saccharomyces cerevisiae</i> (Baker's yeast).               |
| ARAD1C10934g | 14 | gnl TC-DB Q06593 | 2.A.67.1 | Hypothetical Protein HRD799 - <i>Saccharomyces cerevisiae</i> (Baker's yeast).               |
| ARAD1D42988g | 12 | gnl TC-DB O14031 | 2.A.67.1 | Uncharacterized oligopeptide transporter C29B12.10c - <i>Schizosaccharomyces pombe</i>       |
| ARAD1C13178g | 13 | gnl TC-DB Q54EF1 | 2.A.67.2 | Putative uncharacterized protein - <i>Dictyostelium discoideum</i>                           |
| ARAD1D28072g | 9  | gnl TC-DB Q00974 | 2.A.7.10 | UDP N-acetylglucosamine transporter - <i>Kluyveromyces lactis</i> (Yeast).                   |
| ARAD1C27478g | 10 | gnl TC-DB O64503 | 2.A.7.11 | Expressed protein - <i>Arabidopsis thaliana</i> (Mouse-ear cress).                           |
| ARAD1C40700g | 7  | gnl TC-DB O16658 | 2.A.7.12 | Putative uncharacterized protein - <i>Caenorhabditis elegans</i> .                           |
| ARAD1D08646g | 9  | gnl TC-DB Q96WN8 | 2.A.7.13 | Golgi GDP-mannose transporter - <i>Candida albicans</i> (Yeast).                             |
| ARAD1D04576g | 10 | gnl TC-DB Q9SFT8 | 2.A.7.24 | Putative integral membrane protein - <i>Arabidopsis thaliana</i> (Mouse-ear cress).          |
| ARAD1A13882g | 8  | gnl TC-DB Q04083 | 2.A.7.24 | Thiamine-repressible mitochondrial transport protein THI74 - <i>Saccharomyces cerevisiae</i> |
| ARAD1B20196g | 10 | gnl TC-DB Q04083 | 2.A.7.24 | Thiamine-repressible mitochondrial transport protein THI74 - <i>Saccharomyces cerevisiae</i> |
| ARAD1B21626g | 8  | gnl TC-DB Q9LIR9 | 2.A.7.25 | Gb AAF34307.1                                                                                |
| ARAD1C42988g | 9  | gnl TC-DB Q7RWT8 | 2.A.7.25 | Putative uncharacterized protein - <i>Neurospora crassa</i> .                                |
| ARAD1B17006g | 8  | gnl TC-DB P22215 | 2.A.7.9  | SLY41 protein - <i>Saccharomyces cerevisiae</i> (Baker's yeast).                             |



|              |    |                  |           |                                                                                               |
|--------------|----|------------------|-----------|-----------------------------------------------------------------------------------------------|
| ARAD1D06908g | 9  | gnl TC-DB Q10495 | 2.A.85.3  | Hypothetical 111.4                                                                            |
| ARAD1D23386g | 7  | gnl TC-DB Q10495 | 2.A.85.3  | Hypothetical 111.4                                                                            |
| ARAD1C21824g | 8  | gnl TC-DB Q10495 | 2.A.85.3  | Hypothetical 111.4                                                                            |
| ARAD1C39710g | 10 | gnl TC-DB Q10495 | 2.A.85.3  | Hypothetical 111.4                                                                            |
| ARAD1A17996g | 2  | gnl TC-DB Q25771 | 2.A.85.4  | Asparagine-rich antigen (clone 25c4) (fragment) - <i>Plasmodium falciparum</i> .              |
| ARAD1A06820g | 3  | gnl TC-DB P47818 | 2.A.89.1  | Protein CCC1 - <i>Saccharomyces cerevisiae</i> (Baker's yeast).                               |
| ARAD1B01188g | 4  | gnl TC-DB P39952 | 2.A.9.1   | Cytochrome oxidase biogenesis protein Oxa1 - <i>Saccharomyces cerevisiae</i> (baker's yeast). |
| ARAD1C39754g | 10 | gnl TC-DB Q8BY89 | 2.A.92.1  | Choline transporter-like protein 2 - <i>Mus musculus</i> (Mouse).                             |
| ARAD1B15180g | 3  | gnl TC-DB B0WNM6 | 2.A.94.1  | Xenotropic and polytropic murine leukemia virus receptor xpr1 - <i>Culex quinquefasciatus</i> |
| ARAD1C31768g | 4  | gnl TC-DB B0WNM6 | 2.A.94.1  | Xenotropic and polytropic murine leukemia virus receptor xpr1 - <i>Culex quinquefasciatus</i> |
| ARAD1C23254g | 6  | gnl TC-DB B0WNM6 | 2.A.94.1  | Xenotropic and polytropic murine leukemia virus receptor xpr1 - <i>Culex quinquefasciatus</i> |
| ARAD1D46134g | 3  | gnl TC-DB B0WNM6 | 2.A.94.1  | Xenotropic and polytropic murine leukemia virus receptor xpr1 - <i>Culex quinquefasciatus</i> |
| ARAD1A09152g | 6  | gnl TC-DB P25613 | 2.A.96.1  | Uncharacterized protein YCR010C - <i>Saccharomyces cerevisiae</i> GN=YCR010C                  |
| ARAD1A17248g | 6  | gnl TC-DB P25613 | 2.A.96.1  | Uncharacterized protein YCR010C - <i>Saccharomyces cerevisiae</i> GN=YCR010C                  |
| ARAD1D43692g | 5  | gnl TC-DB P25613 | 2.A.96.1  | Uncharacterized protein YCR010C - <i>Saccharomyces cerevisiae</i> GN=YCR010C                  |
| ARAD1A01188g | 5  | gnl TC-DB P25613 | 2.A.96.1  | Uncharacterized protein YCR010C - <i>Saccharomyces cerevisiae</i> GN=YCR010C                  |
| ARAD1A01276g | 6  | gnl TC-DB P25613 | 2.A.96.1  | Uncharacterized protein YCR010C - <i>Saccharomyces cerevisiae</i> GN=YCR010C                  |
| ARAD1A15114g | 12 | gnl TC-DB P08183 | 3.A.1.201 | Multidrug resistance protein 1 (P-glycoprotein 1) - <i>Homo sapiens</i> (Human).              |
| ARAD1C40040g | 2  | gnl TC-DB P33897 | 3.A.1.203 | Adrenoleukodystrophy protein (ALDP) - <i>Homo sapiens</i> (Human).                            |
| ARAD1C11440g | 3  | gnl TC-DB P33897 | 3.A.1.203 | Adrenoleukodystrophy protein (ALDP) - <i>Homo sapiens</i> (Human).                            |
| ARAD1C37202g | 7  | gnl TC-DB A8WEV1 | 3.A.1.204 | ABC transporter ABCG6 - <i>Leishmania donovani</i> .                                          |
| ARAD1D38104g | 11 | gnl TC-DB Q9H221 | 3.A.1.204 | ATP-binding cassette sub-family G member 8 (Sterolin-2) - <i>Homo sapiens</i> (Human).        |
| ARAD1A14146g | 6  | gnl TC-DB Q9C8K2 | 3.A.1.204 | ATP-dependent transmembrane transporter - <i>Arabidopsis thaliana</i>                         |
| ARAD1C43582g | 12 | gnl TC-DB P43071 | 3.A.1.205 | Multidrug resistance protein CDR1 - <i>Candida albicans</i> (Yeast).                          |
| ARAD1D07634g | 13 | gnl TC-DB P43071 | 3.A.1.205 | Multidrug resistance protein CDR1 - <i>Candida albicans</i> (Yeast).                          |
| ARAD1A12298g | 10 | gnl TC-DB P32568 | 3.A.1.205 | SNQ2 protein - <i>Saccharomyces cerevisiae</i> (Baker's yeast).                               |
| ARAD1D20724g | 12 | gnl TC-DB P32568 | 3.A.1.205 | SNQ2 protein - <i>Saccharomyces cerevisiae</i> (Baker's yeast).                               |
| ARAD1B20988g | 12 | gnl TC-DB P32568 | 3.A.1.205 | SNQ2 protein - <i>Saccharomyces cerevisiae</i> (Baker's yeast).                               |
| ARAD1D37796g | 12 | gnl TC-DB P12866 | 3.A.1.206 | Mating factor A secretion protein STE6 - <i>Saccharomyces cerevisiae</i> (Baker's yeast).     |
| ARAD1C02970g | 16 | gnl TC-DB P32386 | 3.A.1.208 | ATP-dependent bile acid permease - <i>Saccharomyces cerevisiae</i> (Baker's yeast).           |
| ARAD1D22132g | 16 | gnl TC-DB P39109 | 3.A.1.208 | Metal resistance protein YCF1 - <i>Saccharomyces cerevisiae</i> (Baker's yeast).              |
| ARAD1D25124g | 14 | gnl TC-DB P39109 | 3.A.1.208 | Metal resistance protein YCF1 - <i>Saccharomyces cerevisiae</i> (Baker's yeast).              |
| ARAD1A18106g | 10 | gnl TC-DB P53049 | 3.A.1.208 | Oligomycin resistance ATP-dependent permease YOR1 - <i>Saccharomyces cerevisiae</i>           |
| ARAD1D05544g | 5  | gnl TC-DB P40416 | 3.A.1.210 | Mitochondrial transporter ATM1 precursor - <i>Saccharomyces cerevisiae</i> (Baker's yeast).   |
| ARAD1B18150g | 14 | gnl TC-DB P78363 | 3.A.1.211 | Retinal-specific ATP-binding cassette transporter - <i>Homo sapiens</i> (Human).              |
| ARAD1C13288g | 5  | gnl TC-DB P33310 | 3.A.1.212 | ATP-dependent permease MDL1 - <i>Saccharomyces cerevisiae</i> (Baker's yeast).                |
| ARAD1A07766g | 4  | gnl TC-DB P46889 | 3.A.12.1  | Cell division protein ftsK - <i>Escherichia coli</i> .                                        |
| ARAD1D37180g | 2  | gnl TC-DB P25694 | 3.A.16.1  | Cell division control protein 48 - <i>Saccharomyces cerevisiae</i> (Baker's yeast).           |
| ARAD1C38610g | 4  | gnl TC-DB Q9BUN8 | 3.A.16.1  | Transitional endoplasmic reticulum ATPase (TER ATPase) - <i>Homo sapiens</i> (Human).         |

|              |    |                    |          |                                                                                                    |
|--------------|----|--------------------|----------|----------------------------------------------------------------------------------------------------|
| ARAD1C16214g | 4  | gnl TC-DB Q9UKV3   | 3.A.18.1 | Apoptotic chromatin condensation inducer in the nucleus - <i>Homo sapiens</i> (Human).             |
| ARAD1C11704g | 3  | gnl TC-DB Q8IYB3   | 3.A.18.1 | Eukaryotic initiation factor 4A-III - <i>Homo sapiens</i> (Human).                                 |
| ARAD1A10296g | 4  | gnl TC-DB Q8IYB3   | 3.A.18.1 | Serine/arginine repetitive matrix protein 1 - <i>Homo sapiens</i> (Human).                         |
| ARAD1C03278g | 4  | gnl TC-DB P32842   | 3.A.2.2  | Vacuolar ATP synthase subunit b - <i>Saccharomyces cerevisiae</i>                                  |
| ARAD1C30008g | 4  | gnl TC-DB P25515   | 3.A.2.2  | Vacuolar ATP synthase subunit b - <i>Saccharomyces cerevisiae</i>                                  |
| ARAD1C38280g | 5  | gnl TC-DB P23968   | 3.A.2.2  | Vacuolar ATP synthase subunit b - <i>Saccharomyces cerevisiae</i>                                  |
| ARAD1D18832g | 7  | gnl TC-DB P32563   | 3.A.2.2  | Vacuolar ATP synthase subunit b - <i>Saccharomyces cerevisiae</i>                                  |
| ARAD1B14322g | 6  | gnl TC-DB P32563   | 3.A.2.2  | Vacuolar ATP synthase subunit b - <i>Saccharomyces cerevisiae</i>                                  |
| ARAD1D35706g | 10 | gnl TC-DB P50993   | 3.A.3.1  | Sodium/potassium-transporting ATPase subunit alpha-2 - <i>Homo sapiens</i>                         |
| ARAD1B19404g | 7  | gnl TC-DB P39986   | 3.A.3.10 | Probable cation-transporting ATPase 1 - <i>Saccharomyces cerevisiae</i> (Baker's yeast).           |
| ARAD1D44946g | 10 | gnl TC-DB Q54X63   | 3.A.3.15 | Cation-transporting ATPase - <i>Dictyostelium discoideum</i> AX4.                                  |
| ARAD1D42218g | 8  | gnl TC-DB P13586   | 3.A.3.2  | Calcium-transporting ATPase 1 - <i>Saccharomyces cerevisiae</i> (baker's yeast).                   |
| ARAD1A06798g | 7  | gnl TC-DB P54678   | 3.A.3.2  | Probable calcium-transporting ATPase PAT1 - <i>Dictyostelium discoideum</i> (Slime mold).          |
| ARAD1C10296g | 8  | gnl TC-DB P16615   | 3.A.3.2  | Sarcoplasmic/endoplasmic reticulum calcium ATPase 2                                                |
| ARAD1C39468g | 10 | gnl TC-DB P07038   | 3.A.3.3  | Plasma membrane ATPase (EC 3.6.3.6) (proton pump) - <i>Neurospora crassa</i> .                     |
| ARAD1C41800g | 9  | gnl TC-DB P07038   | 3.A.3.3  | Plasma membrane ATPase (EC 3.6.3.6) (proton pump) - <i>Neurospora crassa</i> .                     |
| ARAD1D15114g | 8  | gnl TC-DB Q9UUVL6  | 3.A.3.5  | Copper resistance-associated P-type ATPase - <i>Candida albicans</i> (Yeast).                      |
| ARAD1D04444g | 8  | gnl TC-DB P38995   | 3.A.3.5  | Copper-transporting ATPase - <i>Saccharomyces cerevisiae</i> (Baker's yeast).                      |
| ARAD1D36564g | 7  | gnl TC-DB P39524   | 3.A.3.8  | Potential phospholipid-transporting ATPase 1 - <i>Saccharomyces cerevisiae</i>                     |
| ARAD1C23694g | 5  | gnl TC-DB P39524   | 3.A.3.8  | Potential phospholipid-transporting ATPase 1 - <i>Saccharomyces cerevisiae</i>                     |
| ARAD1C07084g | 10 | gnl TC-DB P32660   | 3.A.3.8  | Probable phospholipid-transporting ATPase DNF1 - <i>Saccharomyces cerevisiae</i>                   |
| ARAD1D11220g | 10 | gnl TC-DB P32660   | 3.A.3.8  | Probable phospholipid-transporting ATPase DNF1 - <i>Saccharomyces cerevisiae</i>                   |
| ARAD1D01364g | 7  | gnl TC-DB Q9XIE6   | 3.A.3.8  | Putative phospholipid-transporting ATPase 3 - <i>Arabidopsis thaliana</i> (Mouse-ear cress).       |
| ARAD1D26796g | 10 | gnl TC-DB O13398   | 3.A.3.9  | P-type ATPase 2 - <i>Debaryomyces occidentalis</i> (Yeast) ( <i>Schwanniomyces occidentalis</i> ). |
| ARAD1D33770g | 8  | gnl TC-DB P32915   | 3.A.5.8  | Signal recognition particle receptor alpha subunit homolog - <i>Saccharomyces cerevisiae</i>       |
| ARAD1D17028g | 2  | gnl TC-DB P21825_1 | 3.A.5.8  | Translocation protein (NPL1 protein) - <i>Saccharomyces cerevisiae</i> (Baker's yeast).            |
| ARAD1A16566g | 3  | gnl TC-DB P14906   | 3.A.5.8  | Translocation protein SEC66 (HSS1 protein) - <i>Saccharomyces cerevisiae</i> (Baker's yeast).      |
| ARAD1B03894g | 8  | gnl TC-DB P32915   | 3.A.5.8  | Translocation protein SEC72 (P23) - <i>Saccharomyces cerevisiae</i> (Baker's yeast).               |
| ARAD1D01958g | 3  | gnl TC-DB Q9UGP8   | 3.A.5.9  | Signal recognition particle 68 kDa protein (SRP68) - <i>Homo sapiens</i> (Human).                  |
| ARAD1C41646g | 3  | gnl TC-DB P39515   | 3.A.8.1  | Mitochondrial import inner membrane translocase subunit TIM22 - <i>Saccharomyces cerevisiae</i>    |
| ARAD1D14542g | 4  | gnl TC-DB P25710   | 3.D.1.6  | NADH:ubiquinone oxidoreductase 14kD subunit - <i>Neurospora crassa</i> .                           |
| ARAD1B03476g | 5  | gnl TC-DB P21592   | 3.D.4.8  | Cytochrome c oxidase polypeptide VII (EC 1.9.3.1) - <i>Saccharomyces cerevisiae</i>                |
| ARAD1C15598g | 2  | gnl TC-DB P53266   | 3.D.4.8  | SHY1 protein - i (Baker's yeast).                                                                  |
| ARAD1D36212g | 7  | gnl TC-DB O74631   | 3.E.1.5  | Protein FDD123 (CVHSP30/1) - <i>Coriolus versicolor</i> .                                          |
| ARAD1C06138g | 7  | gnl TC-DB P32791   | 5.B.1.5  | Ferric reductase transmembrane component 1 precursor - <i>Saccharomyces cerevisiae</i>             |
| ARAD1D37862g | 6  | gnl TC-DB P32791   | 5.B.1.5  | Ferric reductase transmembrane component 1 precursor - <i>Saccharomyces cerevisiae</i>             |
| ARAD1D26136g | 6  | gnl TC-DB P32791   | 5.B.1.5  | Ferric reductase transmembrane component 1 precursor - <i>Saccharomyces cerevisiae</i>             |
| ARAD1C28952g | 6  | gnl TC-DB P32791   | 5.B.1.5  | Ferric reductase transmembrane component 1 precursor - <i>Saccharomyces cerevisiae</i>             |
| ARAD1D38060g | 6  | gnl TC-DB P32791   | 5.B.1.5  | Ferric reductase transmembrane component 1 precursor - <i>Saccharomyces cerevisiae</i>             |

|              |    |                  |          |                                                                                               |
|--------------|----|------------------|----------|-----------------------------------------------------------------------------------------------|
| ARAD1D04136g | 6  | gnl TC-DB P32791 | 5.B.1.5  | Ferric reductase transmembrane component 1 precursor - <i>Saccharomyces cerevisiae</i>        |
| ARAD1B03432g | 6  | gnl TC-DB P32791 | 5.B.1.5  | Ferric reductase transmembrane component 1 precursor - <i>Saccharomyces cerevisiae</i>        |
| ARAD1D50996g | 6  | gnl TC-DB P32791 | 5.B.1.5  | Ferric reductase transmembrane component 1 precursor - <i>Saccharomyces cerevisiae</i>        |
| ARAD1A00264g | 7  | gnl TC-DB Q12473 | 5.B.1.7  | Ferric reductase transmembrane component 6 - <i>Saccharomyces cerevisiae</i>                  |
| ARAD1A00286g | 7  | gnl TC-DB Q12473 | 5.B.1.7  | Ferric reductase transmembrane component 6 - <i>Saccharomyces cerevisiae</i>                  |
| ARAD1D40370g | 8  | gnl TC-DB Q12473 | 5.B.1.7  | Ferric reductase transmembrane component 6 - <i>Saccharomyces cerevisiae</i>                  |
| ARAD1D25784g | 6  | gnl TC-DB Q9WUE3 | 5.B.2.1  | 101F6 protein (Tumor suppressor region 10) - <i>Mus musculus</i> (Mouse).                     |
| ARAD1B20570g | 2  | gnl TC-DB P25656 | 8.A.27.1 | Cell division control protein 50 - <i>Saccharomyces cerevisiae</i> (Baker's yeast).           |
| ARAD1A13288g | 7  | gnl TC-DB Q9P8U8 | 9.A.10.1 | High-affinity iron permease CaFTR2 - <i>Candida albicans</i> (Yeast).                         |
| ARAD1A02970g | 7  | gnl TC-DB Q9P8U8 | 9.A.10.1 | High-affinity iron permease CaFTR2 - <i>Candida albicans</i> (Yeast).                         |
| ARAD1A02992g | 7  | gnl TC-DB Q9P8U8 | 9.A.10.1 | High-affinity iron permease CaFTR2 - <i>Candida albicans</i> (Yeast).                         |
| ARAD1C27610g | 3  | gnl TC-DB P39685 | 9.A.14.1 | Nucleoporin GLE1 - <i>Saccharomyces cerevisiae</i> (Baker's yeast).                           |
| ARAD1C28028g | 2  | gnl TC-DB Q12445 | 9.A.14.1 | Nucleoporin GLE2 - <i>Saccharomyces cerevisiae</i> (Baker's yeast).                           |
| ARAD1C08932g | 3  | gnl TC-DB Q02455 | 9.A.14.1 | Protein MLP1 - <i>Saccharomyces cerevisiae</i> (Baker's yeast).                               |
| ARAD1C19316g | 7  | gnl TC-DB P53047 | 9.A.26.1 | RTA1 protein - <i>Saccharomyces cerevisiae</i> (Baker's yeast).                               |
| ARAD1A19184g | 7  | gnl TC-DB Q08417 | 9.A.26.1 | <i>S.cerevisiae</i> chromosome XV reading frame ORF YOR049c - <i>Saccharomyces cerevisiae</i> |
| ARAD1D27698g | 8  | gnl TC-DB Q08417 | 9.A.26.1 | <i>S.cerevisiae</i> chromosome XV reading frame ORF YOR049c - <i>Saccharomyces cerevisiae</i> |
| ARAD1D02684g | 7  | gnl TC-DB P40100 | 9.A.26.1 | Uncharacterized protein YER185W - <i>Saccharomyces cerevisiae</i> (Baker's yeast).            |
| ARAD1C44088g | 7  | gnl TC-DB P40100 | 9.A.26.1 | Uncharacterized protein YER185W - <i>Saccharomyces cerevisiae</i> (Baker's yeast).            |
| ARAD1D13090g | 4  | gnl TC-DB Q12207 | 9.A.27.1 | Non-classical export protein 2 - <i>Saccharomyces cerevisiae</i> (Baker's yeast).             |
| ARAD1D20526g | 4  | gnl TC-DB Q3TWN3 | 9.A.40.3 | Metal transporter CNNM2 - <i>Mus musculus</i> (Mouse).                                        |
| ARAD1D41734g | 5  | gnl TC-DB Q3TWN3 | 9.A.40.3 | Metal transporter CNNM2 - <i>Mus musculus</i> (Mouse).                                        |
| ARAD1A06556g | 4  | gnl TC-DB Q13454 | 9.A.45.1 | Tumor suppressor candidate 3 - <i>Homo sapiens</i> GN=TUSC3 PE=2 SV=1                         |
| ARAD1D32538g | 4  | gnl TC-DB P38224 | 9.A.46.1 | Factor-induced gene 1 protein - <i>Saccharomyces cerevisiae</i> (Baker's yeast).              |
| ARAD1D27258g | 4  | gnl TC-DB P38224 | 9.A.46.1 | Factor-induced gene 1 protein - <i>Saccharomyces cerevisiae</i> (Baker's yeast).              |
| ARAD1C21450g | 16 | gnl TC-DB P36051 | 9.A.6.1  | GPI-anchor biosynthetic protein MCD4 - <i>Saccharomyces cerevisiae</i> (Baker's yeast).       |
| ARAD1C06490g | 10 | gnl TC-DB P36051 | 9.A.6.1  | GPI-anchor biosynthetic protein MCD4 - <i>Saccharomyces cerevisiae</i> (Baker's yeast).       |
| ARAD1C05786g | 16 | gnl TC-DB P36051 | 9.A.6.1  | GPI-anchor biosynthetic protein MCD4 - <i>Saccharomyces cerevisiae</i> (Baker's yeast).       |
| ARAD1D06204g | 2  | gnl TC-DB P38356 | 9.B.1.1  | Metal homeostasis protein BSD2 - <i>Saccharomyces cerevisiae</i> (Baker's yeast).             |
| ARAD1C09966g | 2  | gnl TC-DB P14359 | 9.B.12.3 | Hypothetical 15.2                                                                             |
| ARAD1C00968g | 7  | gnl TC-DB Q12067 | 9.B.19.1 | Metal homeostasis protein ATX2 - <i>Saccharomyces cerevisiae</i> (Bakers yeast).              |
| ARAD1B19118g | 7  | gnl TC-DB Q63863 | 9.B.24.3 | NMDA receptor glutamate-binding subunit - <i>Rattus sp.</i>                                   |
| ARAD1D19052g | 4  | gnl TC-DB Q10320 | 9.B.26.3 | Hypothetical 31.3                                                                             |
| ARAD1D36058g | 4  | gnl TC-DB P0C0H0 | 9.B.32.1 | Hyaluronan synthase - <i>Streptococcus pyogenes</i> .                                         |
| ARAD1C38104g | 6  | gnl TC-DB P0C0H0 | 9.B.32.1 | Hyaluronan synthase - <i>Streptococcus pyogenes</i> .                                         |
| ARAD1C37862g | 7  | gnl TC-DB Q54066 | 9.B.32.1 | Poly-beta-1,6-N-acetyl-D-glucosamine synthase ICAA - <i>Staphylococcus epidermidis</i> .      |
| ARAD1C38126g | 6  | gnl TC-DB Q54066 | 9.B.32.1 | Poly-beta-1,6-N-acetyl-D-glucosamine synthase ICAA - <i>Staphylococcus epidermidis</i> .      |
| ARAD1D48466g | 5  | gnl TC-DB Q8IUH5 | 9.B.37.1 | Palmitoyltransferase ZDHHC17 - <i>Homo sapiens</i>                                            |
| ARAD1C41690g | 5  | gnl TC-DB Q8IUH5 | 9.B.37.1 | Palmitoyltransferase ZDHHC17 - <i>Homo sapiens</i>                                            |

|              |   |                  |          |                                                                                             |
|--------------|---|------------------|----------|---------------------------------------------------------------------------------------------|
| ARAD1C27368g | 4 | gnl TC-DB Q8R173 | 9.B.37.2 | Palmitoyltransferase ZDHHC3 - <i>Mus musculus</i>                                           |
| ARAD1D07326g | 4 | gnl TC-DB Q8R173 | 9.B.37.2 | Palmitoyltransferase ZDHHC3 - <i>Mus musculus</i>                                           |
| ARAD1B07040g | 4 | gnl TC-DB Q8R173 | 9.B.37.2 | Palmitoyltransferase ZDHHC3 - <i>Mus musculus</i>                                           |
| ARAD1D07568g | 4 | gnl TC-DB P31379 | 9.B.7.2  | Uncharacterized membrane protein YAL018C - <i>Saccharomyces cerevisiae</i> (Baker's yeast). |
| ARAD1D17952g | 3 | gnl TC-DB P25560 | 9.B.82.1 | Protein RER1 involved in retention of membrane proteins - <i>Saccharomyces cerevisiae</i>   |

**Table S10C Class of transporters amplified in 5 "UXYb]bjj cfUbg compared to two other pre-CTG species**

| ID-TCDB     | ARAD | PIPA | YALI | ACRONYM | FAMILY NAME                                                     |
|-------------|------|------|------|---------|-----------------------------------------------------------------|
| 01.A.01.10  | 1    | none | none | VIC     | Voltage-sensitive Na <sup>+</sup> Channel                       |
| 02.A.01.01  | 60   | 17   | 24   | SP      | Sugar Porter                                                    |
| 02.A.01.08  | 3    | none | none | NPP     | Nitrate/Nitrite Porter                                          |
| 02.A.01.19  | 1    | none | none | AAHS    | Aromatic Acid:H <sup>+</sup> Symporter                          |
| 02.A.01.15  | 1    | none | none | OCS     | Organic Cation Transporter                                      |
| 02.A.01.58  | 3    | 1    | 1    | NAG-T   | N-Acetylglucosamine Transporter                                 |
| 02.A.29.17  | 1    | none | none | MC      | Peroxisomal ATP/ADP/AMP Antiporter,                             |
| 02.A.29.18  | 1    | none | none | MC      | Mitochondrial S-adenosylmethionine Carrier,                     |
| 02.A.29.27  | 1    | none | none | MC      | Mitochondrial NAD <sup>+</sup> Transporter,                     |
| 03.A.01.204 | 3    | none | 1    | ABCG    | Eye Pigment Precursor Transporter                               |
| 03.A.12.01  | 1    | none | none | S-DNA-T | Septal DNA Translocator                                         |
| 03.D.01.06. | 1    | none | none | NDH     | Animal H <sup>+</sup> -translocating NADH Dehydrogenase Complex |
| 09.A.40.03  | 2    | none | none | HCC     | HlyC/CorC Family (HemolysinC/Co2+-resistance Protein)           |
| 09.A.46.01  | 2    | none | 1    | LACC    | Putative Low Affinity Ca <sup>2+</sup> Channel Family           |
