# Supplementary material for: The complete genome of Blastobotrys (Arxula) adeninivorans LS3 - a yeast of biotechnological interest
Source: PubMed Central journal article supplement (PMC4022394; doi:10.1186/1754-6834-7-66), 2014-04-24

## Additional File 12. Mating type locus

### Figure S12 Matalpha protein alignments.

Proteins were aligned using Multalin<sup>17</sup>. The Alpha box (DNA binding domain) is boxed in the *S. cerevisiae* sequence. UniProtKB references for the aligned proteins are: F2Z6B8 *Yarrowia lipolytica*, Q707Y7.1 *Ogataea angusta*, Q6BNT6 *Debaryomyces hansenii*, G8XZ51 *Millerozyma farinosa*, F1D944 *Candida orthopsilosis*, F2QXX3 *Komagataella pastoris*, C4Y9N3 *Clavispora lusitaniae*, G8ZQV3 *Torulasporea delbrueckii*, B2G3Y8 *Zygosaccharomyces rouxii*, POCY06 *Saccharomyces cerevisiae*. The tree was built using ClustalW and visualized with NJ Plot; bootstrap values are indicated at nodes.

# Figure S12 MTAL1 homologues

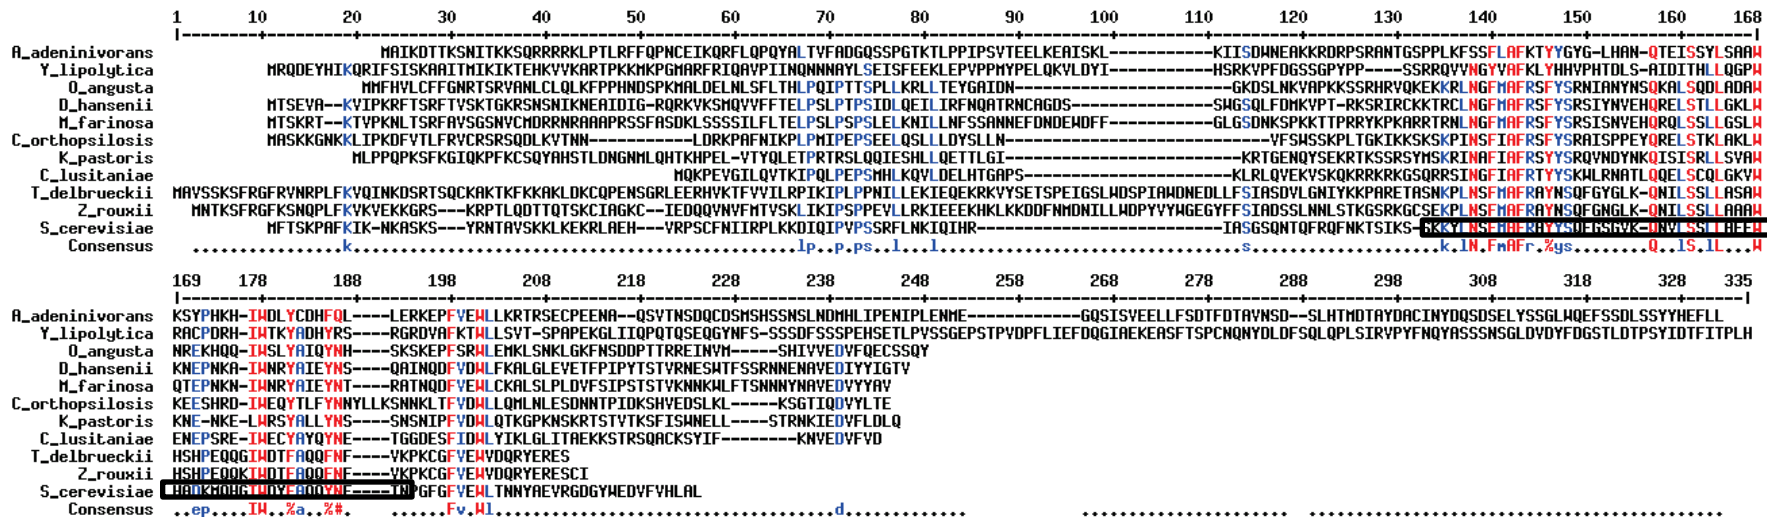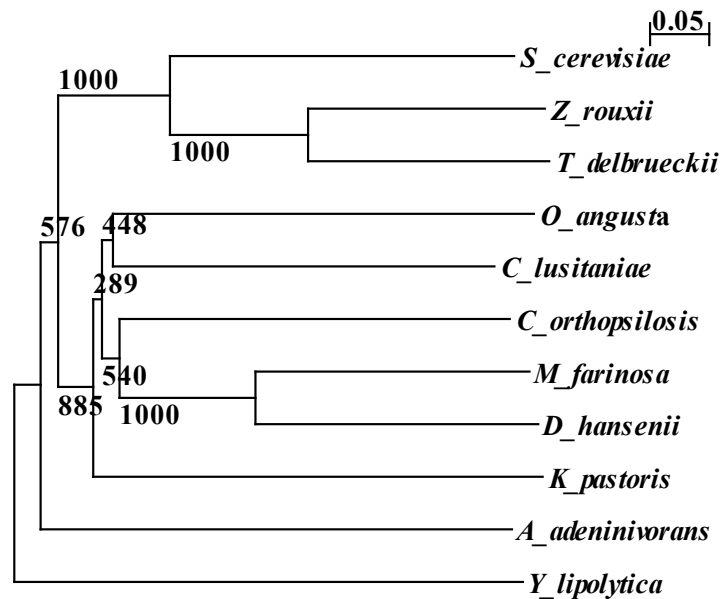

Supplement: 1754-6834-7-66-S12.pdf [file 1754-6834-7-66-S12.pdf]
