# Supplementary material for: The complete genome of Blastobotrys (Arxula) adeninivorans LS3 - a yeast of biotechnological interest
Source: PubMed Central journal article supplement (PMC4022394; doi:10.1186/1754-6834-7-66), 2014-04-24
Supplement: 1754-6834-7-66-S13.pdf [file 1754-6834-7-66-S13.pdf]

## Additional File 13. List of homologues of genes involved in mating, meiosis and sporulation

We compiled a list of *S. cerevisiae* genes annotated as involved in mating, meiosis or sporulation in CGD, and completed it with genes previously assembled for a study of sex gene conservation in CTG yeasts<sup>21</sup>. Homologues of these genes were searched in the reannotated version of *D. hansenii* to facilitate comparison with CTG yeasts, in *K. pastoris*, *Y. lipolytica*, which are all sexual species, and *A. adenivorans*. Only three genes are missing in *A. adenivorans* compared to *Y. lipolytica*, namely homologues of *MER1* (meiosis-specific mRNA splicing), *NTD80* (Meiosis-specific transcription factor) and YJL160C (unknown function required for sporulation). Overall, the same gene set appears conserved in non *Saccharomycetaceae* and represents nearly 80% of the *S. cerevisiae* set. Genes involved in mating are particularly well conserved between *S. cerevisiae* and *A. adenivorans* (48/53). Homologues of the MF $\alpha$  and MF $\beta$  receptors are well conserved, as is the signaling cascade downstream of them and almost all genes involved in mating. Major exceptions concerned *FUS1* required for cell fusion in *S. cerevisiae*, which could not be detected in *Y. lipolytica* or in *A. adenivorans* although this gene is conserved in CTG yeasts and in *K. pastoris*, and *KAR1* involved in karyogamy which however is also missing in *D. hansenii*, *P. pastoris* and *Y. lipolytica*.

On the contrary, meiosis- and sporulation-specific genes are often poorly conserved between *S. cerevisiae* and basal yeasts, and some appear to be missing. A few examples are given below.

Of the three proteins Spo11, Rec102 and Rec104 which form a complex required in *S. cerevisiae* for the initiation of recombination, only Spo11 appears conserved in non-*Saccharomycetaceae* yeasts. The Rec107-Mei4-Rec114 complex, also involved in double strand break formation and in the coordination of recombination initiation and first meiotic division, is apparently absent from non-*Saccharomycetaceae* yeasts. Sae3, which is a meiosis specific protein, forms a heterodimer with Mei5p and is proposed to be an assembly factor for Dmc1p involved in meiotic recombination: while Dmc1 homologues could be clearly identified, Sae3 and Mei5 encoding genes could not be identified in the four non-*Saccharomycetaceae* species. Gmc1 and Gmc2, both involved in meiotic progression and in synaptonemal complex assembly, could also not be identified in these species.

Several *S. cerevisiae* components such as Ady4, Sma1, Spo19, Spo20, Spo21, involved in prospore membrane assembly have apparently no clear counterpart in non *Saccharomycetaceae* species, while Spo1 was nicely conserved in all species. Osw1 and Osw2, required for the construction of the outer spore wall layers, are not found outside *Saccharomycetaceae*.

There are four MutL homologues in *S. cerevisiae* (Mlh1, Mlh2, Mlh3 and Pms1), three of which (Mlh1p-Mlh2p and Mlh1p-Mlh3p) form two heterodimers which play a major role in the meiotic cell cycle for the resolution of heteroduplexes and the repair of specific types of mismatches. Mlh2 seems to have been lost from non-*Saccharomycetaceae* yeasts. Note that the Pms1 which engages in a Mlh1-Pms1 heterodimer and plays a major role in mismatch repair but a limited role in meiotic crossing-over, is conserved in all species tested.

The Zip4 protein regulates crossover distribution by initiating synaptonemal complex formation together with Zip2, while Zip3 provides a link between recombination enzymes and synaptonemal complex proteins. The transverse filament protein Zip1 is required for normal levels of meiotic recombination and pairing between homologues. All are absent from all non-*Saccharomycetaceae* species tested. While Cdc55, Irr1, Mcd1, Mnd2, Rec8, Smc3 required for sister chromatid cohesion are all conserved, Rec8 is poorly conserved in *K. lactis* and *K. pastoris*, but not detectable in *D. hansenii*, *Y. lipolytica* and *A. adenivorans* suggesting divergent evolution. Finally, Spo13, already undetectable in *K. lactis*, might be an "invention" of *Saccharomyces*.

## S13 Genes involved in mating, meiosis and sporulation

| Gene           | <i>S. cerevisiae</i> | <i>D. hansenii</i> | <i>P. pastoris</i> GS115 | <i>Y. lipolytica</i> | <i>A. adenivorans</i> | GO SLIM     | Comment                 |
|----------------|----------------------|--------------------|--------------------------|----------------------|-----------------------|-------------|-------------------------|
| MFA1           | YDR461W              | DEHA2D10775g       | No                       | No                   | No                    | conjugation | a factor                |
| MFA2           | YNL145W              | No                 | No                       | No                   | No                    | conjugation | a factor                |
| STE6           | YKL209C              | DEHA2F17226g       | PAS_chr3_0858            | YALIOE05973g         | ARAD1D37796g          | conjugation | a factor export         |
| AXL1           | YPR122W              | DEHA2E02464g       | PAS_chr2-2_0232          | YALIOF25091g         | ARAD1C18700g          | conjugation | a factor maturation     |
| RAM2           | YKL019W              | DEHA2F11022g       | PAS_chr1-3_0192          | YALIOB16126g         | ARAD1D30690g          | conjugation | a factor maturation     |
| RCE1           | YMR274C              | DEHA2F07260g       | PAS_chr4_0834            | YALIOF07359g         | ARAD1D17776g          | conjugation | a factor maturation     |
| STE14          | YDR410C              | DEHA2G05368g       | PAS_chr3_0130            | YALIOE22913g         | ARAD1B23012g          | conjugation | a factor maturation     |
| STE23          | YLR389C              | DEHA2A05192g       | PAS_chr1-4_0511          | YALIOF25091g         | ARAD1C18700g          | conjugation | a factor maturation     |
| STE24          | YJR117W              | DEHA2F06248g       | PAS_chr2-2_0164          | YALIOF11033g         | ARAD1D28336g          | conjugation | a factor maturation     |
| STE3           | YKL178C              | DEHA2D04004g       | PAS_chr3_0861            | YALIOF11913g         | ARAD1B23936g          | conjugation | a factor receptor       |
| MFA $\alpha$ 1 | YPL187W              | No                 | No                       | YALIOE16533g         | No                    | conjugation | alpha factor            |
| MFA $\alpha$ 2 | YGL089C              | DEHA2F19580g       | PAS_chr2-1_0883*         | YALIOE30415g         | ARAD1C26928g          | conjugation | alpha factor            |
| KEX1           | YGL203C              | DEHA2F22352g       | PAS_chr2-1_0174          | YALIOB05170g         | ARAD1C29150g          | conjugation | alpha factor maturation |
| KEX2           | YNL238W              | DEHA2C10296g       | PAS_chr2-1_0304          | YALIOF13189g         | ARAD1D46200g          | conjugation | alpha factor maturation |
| STE13          | YOR219C              | DEHA2E17490g       | PAS_chr2-2_0310          | YALIOB02838g         | ARAD1C38214g          | conjugation | alpha factor maturation |
| STE2           | YFL026W              | DEHA2A10736g       | PAS_chr4_0123            | YALIOF03905g         | ARAD1C29216g          | conjugation | alpha factor receptor   |
| DEP1           | YAL013W              | DEHA2C16192g       | PAS_chr1-4_0492          | YALIOF05896g         | ARAD1C06710g          | conjugation | mating efficiency       |
| PRY3           | YJL078C              | DEHA2G01276g       | PAS_chr3_0076            | YALIOF21450g         | ARAD1D08536g          | conjugation | mating efficiency       |
| HYM1           | YKL189W              | DEHA2D06974g       | PAS_chr3_0313            | YALIOD01199g         | ARAD1C39930g          | conjugation | mating efficiency       |
| BAR1           | YIL015W              | DEHA2A03256g       | PAS_chr4_0584            | YALIOE10175g         | ARAD1D23562g          | conjugation | mating efficiency       |
| BEM1           | YBR200W              | DEHA2E21670g       | PAS_chr2-1_0548          | YALIOF27643g         | ARAD1C38654g          | conjugation | morphogenesis           |
| FIG1           | YBR040W              | DEHA2F15686g       | PAS_chr1-4_0077          | YALIOA14069g         | ARAD1D27258g          | conjugation | mating efficiency       |
| FIG2           | YCR089W              | DEHA2G01276g       | PAS_FragB_0067           | YALIOC04136g         | ARAD1D00638g          | conjugation | cell fusion             |
| FIG4           | YNL325C              | DEHA2E19800g       | PAS_chr1-4_0456          | YALIOE33099g         | ARAD1A07876g          | conjugation | mating efficiency       |
| FUS1           | YCL027W              | DEHA2E13816g       | PAS_chr4_0632            | No                   | No                    | conjugation | morphogenesis           |
| FUS2           | YMR232W              | DEHA2B05214g       | No                       | YALIOF13673g         | ARAD1C32560g          | conjugation | karyogamy               |
| HBT1           | YDL223C              | DEHA2B15334g       | PAS_chr1-4_0378          | YALIOF21450g         | ARAD1C28820g          | conjugation | mating efficiency       |
| JEM1           | YJL073W              | DEHA2C09680g       | PAS_chr2-2_0015          | YALIOE17303g         | ARAD1D24882g          | conjugation | karyogamy               |
| KAR1           | YNL188W              | No                 | No                       | No                   | No                    | conjugation | karyogamy               |
| KAR2           | YJL034W              | DEHA2A01364g       | PAS_chr2-1_0140          | YALIOE13706g         | ARAD1D06732g          | conjugation | karyogamy               |

|       |           |              |                 |              |              |                    |                              |
|-------|-----------|--------------|-----------------|--------------|--------------|--------------------|------------------------------|
| KAR3  | YPR141C   | DEHA2B02068g | PAS_chr4_0900   | YALIOC12859g | ARAD1D29744g | conjugation        | karyogamy                    |
| KAR4  | YCL055W   | DEHA2E22770g | PAS_chr4_0468   | YALIOC17017g | ARAD1D47850g | conjugation        | regulator                    |
| KAR5  | YMR065W   | DEHA2E21208g | <b>No</b>       | YALIOD12947g | ARAD1D09152g | conjugation        | karyogamy                    |
| KAR9  | YPL269W   | DEHA2D05016g | PAS_chr2-1_0869 | YALIOE00792g | ARAD1C13354g | conjugation        | karyogamy                    |
| KDX1  | YKL161C   | DEHA2E18348g | PAS_chr3_0895   | YALIOB02816g | ARAD1C38236g | conjugation        | MAP kinase signaling cascade |
| MDY2  | YOL111C   | DEHA2E11462g | PAS_chr2-1_0076 | YALIOB17061g | ARAD1C37972g | conjugation        | morphogenesis                |
| MPS3  | YJL019W   | DEHA2G17842g | PAS_chr1-1_0400 | YALIOB11770g | ARAD1A13860g | conjugation        | karyogamy                    |
| OPY2  | YPR075C   | DEHA2F03982g | PAS_chr3_0637   | YALIOA07601g | ARAD1D22726g | conjugation        | MAP kinase signaling cascade |
| PRM1  | YNL279W   | DEHA2E13948g | PAS_chr1-1_0332 | YALIOE08580g | ARAD1D05522g | conjugation        | cell fusion                  |
| PRM10 | YJL108C   | DEHA2C03278g | PAS_chr1-3_0044 | YALIOE24651g | ARAD1B20878g | conjugation        | mating efficiency            |
| PRM4  | YPL156C   | DEHA2E13508g | PAS_chr2-1_0585 | YALIOF28127g | ARAD1C07502g | conjugation        | mating efficiency            |
| PRM6  | YML047C   | DEHA2F16126g | PAS_chr2-1_0566 | YALIOE34199g | ARAD1C11704g | conjugation        | mating efficiency            |
| PTC1  | YDL006W   | DEHA2C02816g | PAS_chr4_0986   | YALIOD22066g | ARAD1B20460g | conjugation        | MAP kinase signaling cascade |
| RRI2  | YOL117W   | <b>No</b>    | <b>No</b>       | <b>No</b>    | <b>No</b>    | conjugation        | mating efficiency            |
| SCW10 | YMR305C   | DEHA2C12980g | PAS_chr1-3_0229 | YALIOD20680g | ARAD1B07854g | conjugation        | mating efficiency            |
| SCW4  | YGR279C   | DEHA2C12980g | PAS_chr1-3_0229 | YALIOD20680g | ARAD1B07854g | conjugation        | cell fusion                  |
| STE11 | YLR362W   | DEHA2B05016g | PAS_chr3_0469   | YALIOF13629g | ARAD1B23232g | conjugation        | MAP kinase signaling cascade |
| STE12 | YHR084W   | DEHA2F25894g | PAS_chr4_0937   | YALIOE16236g | ARAD1C10714g | conjugation        | MAP kinase signaling cascade |
| STE18 | YJR086W   | DEHA2G24024g | PAS_chr4_0766   | YALIOA06699g | ARAD1C15334g | conjugation        | MAP kinase signaling cascade |
| STE20 | YHL007C   | DEHA2E22220g | PAS_c131_0004   | YALIOF00572g | ARAD1C35046g | conjugation        | MAP kinase signaling cascade |
| STE4  | YOR212W   | DEHA2C16368g | PAS_chr1-1_0201 | YALIOE01364g | ARAD1C24838g | conjugation        | MAP kinase signaling cascade |
| STE5  | YDR103W   | DEHA2G12826g | PAS_chr1-4_0438 | YALIOF20680g | ARAD1A10494g | conjugation        | MAP kinase signaling cascade |
| STE50 | YCL032W   | DEHA2D17490g | PAS_chr1-1_0348 | YALIOE19228g | ARAD1D28622g | conjugation        | MAP kinase signaling cascade |
| STE7  | YDL159W   | DEHA2F14498g | PAS_chr1-4_0008 | YALIOB13178g | ARAD1C26026g | conjugation        | MAP kinase signaling cascade |
| CDC55 | YGL190C   | DEHA2B04708g | PAS_chr2-1_0831 | YALIOD14080g | ARAD1C16544g | meiotic cell cycle | chromatid cohesion           |
| IRR1  | YIL026C   | DEHA2D04488g | PAS_chr3_0540   | YALIOF19382g | ARAD1C02992g | meiotic cell cycle | chromatid cohesion           |
| MCD1  | YDL003W   | DEHA2A14058g | PAS_chr4_0641   | YALIOB08470g | ARAD1B16060g | meiotic cell cycle | chromatid cohesion           |
| MND2  | YIR025W   | DEHA2B01342g | PAS_chr1-3_0304 | YALIOF27819g | ARAD1C20064g | meiotic cell cycle | chromatid cohesion           |
| REC8  | YPR007C   | DEHA2D07106g | PAS_chr3_1166   | <b>No</b>    | <b>No</b>    | meiotic cell cycle | chromatid cohesion           |
| SMC3  | YJL074C   | DEHA2G01606g | PAS_chr2-2_0306 | YALIOA00616g | ARAD1D32186g | meiotic cell cycle | chromatid cohesion           |
| SPO13 | YHR014W   | <b>No</b>    | <b>No</b>       | <b>No</b>    | <b>No</b>    | meiotic cell cycle | chromatid cohesion           |
| HED1  | YDR014W-A | <b>No</b>    | <b>No</b>       | <b>No</b>    | <b>No</b>    | meiotic cell cycle | Meiotic recombination        |
| HFM1  | YGL251C   | DEHA2F07986g | PAS_chr1-1_0269 | YALIOB13904g | ARAD1C39490g | meiotic cell cycle | Meiotic recombination        |

|        |           |              |                 |              |              |                    |                       |
|--------|-----------|--------------|-----------------|--------------|--------------|--------------------|-----------------------|
| HOP2   | YGL033W   | DEHA2D12210g | No              | No           | No           | meiotic cell cycle | Meiotic recombination |
| MEI4   | YER044C-A | No           | No              | No           | No           | meiotic cell cycle | Meiotic recombination |
| MEI5   | YPL121C   | DEHA2G23298g | No              | No           | No           | meiotic cell cycle | Meiotic recombination |
| MER1   | YNL210W   | DEHA2A11022g | PAS_chr3_0730   | YALIOD05676g | No           | meiotic cell cycle | Meiotic recombination |
| MLH2   | YLR035C   | No           | No              | No           | No           | meiotic cell cycle | Meiotic recombination |
| MLH3   | YPL164C   | DEHA2E10472g | PAS_chr3_0739   | YALIOC07260g | ARAD1B17160g | meiotic cell cycle | Meiotic recombination |
| MSH4   | YFL003C   | DEHA2B13574g | PAS_chr1-4_0376 | YALIOA09724g | ARAD1B17798g | meiotic cell cycle | Meiotic recombination |
| MUS81  | YDR386W   | DEHA2G05214g | PAS_chr2-1_0135 | YALIOC14960g | ARAD1C39996g | meiotic cell cycle | Meiotic recombination |
| NDT80  | YHR124W   | DEHA2F21230g | PAS_chr2-2_0362 | No           | No           | meiotic cell cycle | Meiotic recombination |
| REC102 | YLR329W   | No           | No              | No           | No           | meiotic cell cycle | Meiotic recombination |
| REC104 | YHR157W   | No           | No              | No           | No           | meiotic cell cycle | Meiotic recombination |
| REC107 | YJR021C   | No           | No              | No           | No           | meiotic cell cycle | Meiotic recombination |
| REC114 | YMR133W   | No           | No              | No           | No           | meiotic cell cycle | Meiotic recombination |
| SAE3   | YHR079C-A | No           | No              | No           | No           | meiotic cell cycle | Meiotic recombination |
| GMC1   | YDR506C   | No           | No              | No           | No           | meiotic cell cycle | synaptonemal complex  |
| GMC2   | YLR445W   | No           | No              | No           | No           | meiotic cell cycle | synaptonemal complex  |
| HOP1   | YIL072W   | DEHA2D14740g | No              | No           | No           | meiotic cell cycle | synaptonemal complex  |
| RED1   | YLR263W   | No           | No              | No           | No           | meiotic cell cycle | synaptonemal complex  |
| SPO11  | YHL022C   | DEHA2B13112g | No              | YALIOF16335g | ARAD1C03784g | meiotic cell cycle | synaptonemal complex  |
| SPO16  | YHR153C   | No           | No              | No           | No           | meiotic cell cycle | synaptonemal complex  |
| ZIP1   | YDR285W   | No           | No              | No           | No           | meiotic cell cycle | synaptonemal complex  |
| ZIP2   | YGL249W   | No           | No              | No           | No           | meiotic cell cycle | synaptonemal complex  |
| ZIP3   | YLR394W   | No           | No              | No           | No           | meiotic cell cycle | synaptonemal complex  |
| BNS1   | YGR230W   | No           | No              | YALIOB20559g | ARAD1D40480g | meiotic cell cycle |                       |
| CDC14  | YFR028C   | DEHA2F15356g | PAS_chr1-4_0081 | YALIOE16038g | ARAD1D35002g | meiotic cell cycle |                       |
| CDC15  | YAR019C   | DEHA2C05060g | PAS_chr3_1061   | YALIOF08165g | ARAD1B20350g | meiotic cell cycle |                       |
| CDC20  | YGL116W   | DEHA2E20966g | PAS_chr2-2_0495 | YALIOC03377g | ARAD1C13024g | meiotic cell cycle |                       |
| CDC31  | YOR257W   | DEHA2F14784g | PAS_chr4_0388   | YALIOA20518g | ARAD1C06886g | meiotic cell cycle |                       |
| CDC40  | YDR364C   | DEHA2G10142g | PAS_chr4_0942   | YALIOD27346g | ARAD1C14630g | meiotic cell cycle |                       |
| CDC5   | YMR001C   | DEHA2F09966g | PAS_chr3_0243   | YALIOD26015g | ARAD1B06974g | meiotic cell cycle |                       |
| CDC7   | YDL017W   | DEHA2C05588g | PAS_chr1-4_0192 | YALIOF23287g | ARAD1D32560g | meiotic cell cycle |                       |
| CLB1   | YGR108W   | DEHA2A01760g | PAS_chr2-1_0102 | YALIOB15180g | ARAD1B18942g | meiotic cell cycle |                       |
| CSM1   | YCR086W   | DEHA2A13486g | PAS_chr1-4_0004 | No           | No           | meiotic cell cycle |                       |

|       |         |              |                 |              |              |                    |
|-------|---------|--------------|-----------------|--------------|--------------|--------------------|
| CSM2  | YIL132C | No           | No              | No           | No           | meiotic cell cycle |
| CSM3  | YMR048W | DEHA2F05038g | PAS_chr4_0244   | YALIOE12287g | ARAD1D14498g | meiotic cell cycle |
| CSM4  | YPL200W | No           | No              | No           | No           | meiotic cell cycle |
| DMC1  | YER179W | DEHA2E16742g | PAS_chr3_0904   | YALIOF15477g | ARAD1C10362g | meiotic cell cycle |
| DON1  | YDR273W | DEHA2E07260g | PAS_chr2-2_0292 | YALIOD00385g | ARAD1D07678g | meiotic cell cycle |
| ECM11 | YDR446W | DEHA2G14498g | PAS_chr4_0241   | No           | No           | meiotic cell cycle |
| EMI1  | YDR512C | DEHA2C06512g | PAS_chr4_0869   | YALIOB16962g | ARAD1B21208g | meiotic cell cycle |
| EMI2  | YDR516C | DEHA2E06556g | PAS_chr4_0624   | YALIOE15488g | ARAD1D19602g | meiotic cell cycle |
| EXO1  | YOR033C | DEHA2E15444g | PAS_chr1-4_0633 | YALIOE14014g | ARAD1C01540g | meiotic cell cycle |
| GLC7  | YER133W | DEHA2E03674g | PAS_chr2-1_0635 | YALIOA08077g | ARAD1A08338g | meiotic cell cycle |
| HOS4  | YIL112W | DEHA2D02904g | PAS_chr4_0221   | YALIOF00770g | ARAD1D35926g | meiotic cell cycle |
| HRR25 | YPL204W | DEHA2C04290g | PAS_chr2-1_0219 | YALIOF08305g | ARAD1D24046g | meiotic cell cycle |
| IDS2  | YJL146W | No           | No              | No           | No           | meiotic cell cycle |
| IME1  | YJR094C | No           | No              | No           | No           | meiotic cell cycle |
| IME2  | YJL106W | DEHA2B00748g | PAS_chr1-3_0041 | YALIOF03113g | ARAD1B20922g | meiotic cell cycle |
| IME4  | YGL192W | DEHA2B04598g | PAS_chr2-1_0364 | YALIOB03498g | ARAD1C32758g | meiotic cell cycle |
| LRS4  | YDR439W | No           | No              | No           | No           | meiotic cell cycle |
| MAD2  | YJL030W | DEHA2A10846g | PAS_chr4_0125   | YALIOE10791g | ARAD1D06754g | meiotic cell cycle |
| MAM1  | YER106W | No           | No              | No           | No           | meiotic cell cycle |
| MCK1  | YNL307C | DEHA2E05060g | PAS_chr4_0812   | YALIOD20966g | ARAD1B04290g | meiotic cell cycle |
| MEK1  | YOR351C | No           | No              | No           | No           | meiotic cell cycle |
| MER3  | YGL251C | DEHA2F07986g | PAS_chr1-1_0269 | YALIOB13904g | ARAD1C39490g | meiotic cell cycle |
| MLH1  | YMR167W | DEHA2G22022g | PAS_chr2-1_0165 | YALIOC10032g | ARAD1B17160g | meiotic cell cycle |
| MMS4  | YBR098W | DEHA2F15158g | PAS_chr2-1_0041 | YALIOE33715g | ARAD1D48378g | meiotic cell cycle |
| MND1  | YGL183C | DEHA2E04246g | No              | No           | No           | meiotic cell cycle |
| MRE11 | YMR224C | DEHA2F15818g | PAS_chr3_0851   | YALIOB14553g | ARAD1D16258g | meiotic cell cycle |
| MSH2  | YOL090W | DEHA2B15818g | PAS_chr1-4_0634 | YALIOF26499g | ARAD1B17798g | meiotic cell cycle |
| MSH5  | YDL154W | DEHA2B15818g | PAS_chr1-4_0634 | YALIOB10197g | ARAD1B17798g | meiotic cell cycle |
| MSH6  | YDR097C | DEHA2B13574g | PAS_chr2-1_0094 | YALIOA09724g | ARAD1D37092g | meiotic cell cycle |
| MUM2  | YBR057C | DEHA2G12298g | PAS_chr3_1241   | YALIOA00369g | ARAD1A11176g | meiotic cell cycle |
| MUS81 | YDR386W | DEHA2G05214g | PAS_chr2-1_0135 | YALIOC14960g | ARAD1C39996g | meiotic cell cycle |
| NDJ1  | YOL104C | No           | No              | No           | No           | meiotic cell cycle |
| NDT80 | YHR124W | DEHA2A07282g | PAS_chr2-2_0362 | YALIOB14773g | No           | meiotic cell cycle |

|         |         |              |                 |                |                |                    |
|---------|---------|--------------|-----------------|----------------|----------------|--------------------|
| PDS5    | YMR076C | DEHA2F19646g | PAS_chr3_0173   | YALIOE12969g   | ARAD1C18656g   | meiotic cell cycle |
| PMS1    | YNL082W | DEHA2A10868g | PAS_chr4_0124   | YALIOE10769g   | ARAD1D12122g   | meiotic cell cycle |
| RAD1    | YPL022W | DEHA2F08932g | PAS_chr2-2_0184 | YALIOB22242g   | ARAD1B12254g   | meiotic cell cycle |
| RAD50   | YNL250W | DEHA2D17314g | PAS_chr1-4_0513 | YALIOD15246g   | ARAD1D47388g   | meiotic cell cycle |
| RAD51   | YER095W | DEHA2C16698g | PAS_chr3_0904   | YALIOF15477g   | ARAD1C10362g   | meiotic cell cycle |
| RAD52   | YML032C | DEHA2G05148g | PAS_chr2-1_0153 | YALIOF02431g   | ARAD1B23606g   | meiotic cell cycle |
| RAD55   | YDR076W | No           | PAS_chr1-4_0587 | No             | No             | meiotic cell cycle |
| RAD57   | YDR004W | DEHA2B13024g | PAS_chr1-3_0025 | YALIOF10307g   | ARAD1C29722g   | meiotic cell cycle |
| RAM1    | YDL090C | DEHA2G16918g | PAS_chr3_0636   | YALIOD14762g   | ARAD1A02112g   | meiotic cell cycle |
| RDH54   | YBR073W | DEHA2F06446g | PAS_FragB_0039  | YALIOE24431g   | ARAD1C24750g   | meiotic cell cycle |
| RIM101  | YHL027W | DEHA2D04796g | PAS_chr3_0625   | YALIOB13640g   | ARAD1C01914g   | meiotic cell cycle |
| RIM11   | YMR139W | DEHA2F08756g | PAS_chr1-4_0368 | YALIOD20966g   | ARAD1B04290g   | meiotic cell cycle |
| RIM15   | YFL033C | DEHA2F22572g | PAS_chr3_0148   | YALIOF14707g   | ARAD1C27148g   | meiotic cell cycle |
| RIM4    | YHL024W | DEHA2F03476g | PAS_chr1-3_0299 | YALIOE16863g   | ARAD1C37532g   | meiotic cell cycle |
| RMD1    | YDL001W | DEHA2F18150g | PAS_chr1-1_0444 | YALIOB05390g   | ARAD1B08360g   | meiotic cell cycle |
| RMD6    | YEL072W | DEHA2D13442g | No              | No             | No             | meiotic cell cycle |
| RME1    | YGR044C | DEHA2F19778g | PAS_chr1-1_0434 | YALIOE17215g   | ARAD1D33000g   | meiotic cell cycle |
| SAE2    | YGL175C | DEHA2C14212g | PAS_chr3_0435   | YALIOC23727g   | ARAD1D26114g   | meiotic cell cycle |
| SET3    | YKR029C | DEHA2B01386g | PAS_chr1-3_0037 | YALIOF03069g   | ARAD1B20944g   | meiotic cell cycle |
| SGO1    | YOR073W | DEHA2C06116g | PAS_chr3_0995   | YALIOC07172g   | ARAD1C17688g   | meiotic cell cycle |
| SIN3    | YOL004W | DEHA2F09900g | PAS_chr3_0245   | YALIOD26315g   | ARAD1B07018g   | meiotic cell cycle |
| SLK19   | YOR195W | DEHA2G18942g | PAS_chr2-1_0276 | YALIOF02387g   | ARAD1C09922g   | meiotic cell cycle |
| Spmug66 | No      | DEHA2B08580g | No              | YALIOB07073g   | ARAD1C40227g** | meiotic cell cycle |
| SPO1    | YNL012W | DEHA2F24420g | PAS_chr4_0039   | YALIOE16060g   | ARAD1D35024g   | meiotic cell cycle |
| SPO12   | YHR152W | No           | No              | YALIOB20559g** | ARAD1D40480g   | meiotic cell cycle |
| SPO19   | YPL130W | No           | No              | No             | No             | meiotic cell cycle |
| SPO21   | YOL091W | No           | No              | No             | No             | meiotic cell cycle |
| SPO22   | YIL073C | No           | No              | No             | No             | meiotic cell cycle |
| SPO23   | YBR250W | No           | No              | No             | No             | meiotic cell cycle |
| SPO7    | YAL009W | DEHA2C16104g | PAS_chr1-1_0248 | YALIOD03091g   | ARAD1C05764g   | meiotic cell cycle |
| SSN8    | YNL025C | DEHA2A09878g | PAS_chr2-2_0194 | YALIOD04004g   | ARAD1B21450g   | meiotic cell cycle |
| SSP1    | YHR184W | No           | No              | No             | No             | meiotic cell cycle |
| TOP2    | YNL088W | DEHA2E01738g | PAS_chr3_0322   | YALIOD23969g   | ARAD1D22572g   | meiotic cell cycle |

|        |         |              |                 |              |              |                    |                     |
|--------|---------|--------------|-----------------|--------------|--------------|--------------------|---------------------|
| TOS8   | YGL096W | DEHA2D03454g | PAS_chr3_0590   | YALIOE29271g | ARAD1C40612g | meiotic cell cycle |                     |
| TRS85  | YDR108W | DEHA2E16830g | PAS_chr2-1_0774 | YALIOE12177g | ARAD1D02508g | meiotic cell cycle |                     |
| UME1   | YPL139C | DEHA2G16544g | PAS_chr2-1_0205 | YALIOD26279g | ARAD1C17226g | meiotic cell cycle |                     |
| UME6   | YDR207C | DEHA2E16236g | PAS_chr1-4_0401 | YALIOA02497g | ARAD1D00638g | meiotic cell cycle |                     |
| WTM1   | YOR230W | DEHA2F25234g | PAS_chr2-1_0205 | YALIOD26279g | ARAD1C09592g | meiotic cell cycle |                     |
| WTM2   | YOR229W | No           | No              | No           | No           | meiotic cell cycle |                     |
| YCS4   | YLR272C | DEHA2F23386g | PAS_chr3_0265   | YALIOF06402g | ARAD1C09438g | meiotic cell cycle |                     |
| YSC83  | YHR017W | DEHA2A10670g | No              | YALIOF28545g | ARAD1B07326g | meiotic cell cycle |                     |
| SPO14  | YKR031C | DEHA2C02926g | PAS_chr3_0646   | YALIOE18898g | ARAD1C40744g | sporulation        | ascospore assembly  |
| ADY3   | YDL239C | DEHA2A12056g | PAS_chr4_0316   | YALIOF30855g | ARAD1C09922g | sporulation        | ascospore formation |
| ADY4   | YLR227C | DEHA2E18084g | No              | No           | No           | sporulation        | ascospore formation |
| AMA1   | YGR225W | DEHA2B14498g | PAS_chr1-4_0473 | YALIOB17270g | ARAD1D40392g | sporulation        | ascospore formation |
| CRR1   | YLR213C | DEHA2D15532g | PAS_chr1-1_0293 | YALIOB15510g | ARAD1D00396g | sporulation        | ascospore formation |
| DIT1   | YDR403W | No           | No              | No           | No           | sporulation        | ascospore formation |
| DIT2   | YDR402C | DEHA2E18612g | PAS_chr3_0957   | YALIOB20702g | ARAD1D43758g | sporulation        | ascospore formation |
| DTR1   | YBR180W | DEHA2A10362g | PAS_chr2-2_0065 | YALIOF03751g | ARAD1D36146g | sporulation        | ascospore formation |
| GIP1   | YBR045C | DEHA2D02904g | PAS_FragB_0067  | YALIOB11770g | ARAD1C22704g | sporulation        | ascospore formation |
| LOH1   | YJL038C | No           | No              | No           | No           | sporulation        | ascospore formation |
| MPC54  | YOR177C | DEHA2C08778g | PAS_chr2-2_0307 | YALIOF30855g | ARAD1C09922g | sporulation        | ascospore formation |
| MUM3   | YOR298W | DEHA2D17336g | PAS_chr4_0718   | No           | No           | sporulation        | ascospore formation |
| OSW1   | YOR255W | No           | No              | No           | No           | sporulation        | ascospore formation |
| OSW2   | YLR054C | No           | No              | No           | No           | sporulation        | ascospore formation |
| PFS1   | YHR185C | DEHA2G21472g | No              | No           | No           | sporulation        | ascospore formation |
| SMA2   | YML066C | DEHA2F06072g | PAS_chr4_0971   | No           | No           | sporulation        | ascospore formation |
| SMK1   | YPR054W | DEHA2E18348g | PAS_chr3_0041   | YALIOB02816g | ARAD1C38236g | sporulation        | ascospore formation |
| SPO71  | YDR104C | DEHA2G12804g | PAS_chr1-4_0435 | YALIOD12540g | ARAD1C31592g | sporulation        | ascospore formation |
| SPO73  | YER046W | DEHA2A13332g | PAS_chr3_0550   | YALIOC16841g | ARAD1D13552g | sporulation        | ascospore formation |
| SPO74  | YGL170C | No           | No              | No           | No           | sporulation        | ascospore formation |
| SPO75  | YLL005C | DEHA2G17292g | PAS_chr4_0560   | YALIOD06864g | ARAD1C20702g | sporulation        | ascospore formation |
| SPO77  | YLR341W | No           | No              | No           | No           | sporulation        | ascospore formation |
| SPR28  | YDR218C | DEHA2C02266g | PAS_chr3_0397   | YALIOE17765g | ARAD1D04620g | sporulation        | ascospore formation |
| SPS1   | YDR523C | DEHA2E15488g | PAS_chr1-1_0365 | YALIOD19470g | ARAD1D47740g | sporulation        | ascospore formation |
| SPS100 | YHR139C | DEHA2G05918g | PAS_chr2-2_0481 | YALIOF21450g | ARAD1D00638g | sporulation        | ascospore formation |



|       |         |              |                 |              |              |             |                     |
|-------|---------|--------------|-----------------|--------------|--------------|-------------|---------------------|
| SPS2  | YDR522C | DEHA2E15664g | PAS_c131_0003   | YALIOD07480g | ARAD1D47718g | sporulation | ascospore formation |
| SSP2  | YOR242C | DEHA2C12320g | PAS_chr3_1089   | YALIOD06710g | ARAD1B21560g | sporulation | ascospore formation |
| SWM1  | YDR260C | <b>No</b>    | <b>No</b>       | <b>No</b>    | <b>No</b>    | sporulation | ascospore formation |
| YSW1  | YBR148W | DEHA2C08778g | PAS_chr1-4_0105 | YALIOF02387g | ARAD1C09922g | sporulation | ascospore formation |
| CDA1  | YLR307W | DEHA2C11836g | PAS_chr1-1_0103 | YALIOF30833g | ARAD1C23012g | sporulation |                     |
| CDC10 | YCR002C | DEHA2F17116g | PAS_chr4_0846   | YALIOC21087g | ARAD1A01078g | sporulation |                     |
| CTS2  | YDR371W | DEHA2G08866g | PAS_chr3_0107   | YALIOF04532g | ARAD1B00396g | sporulation |                     |
| EMI5  | YOL071W | DEHA2E13750g | PAS_chr2-1_0323 | YALIOF11957g | ARAD1A15994g | sporulation |                     |
| FMP45 | YDL222C | DEHA2F12386g | PAS_chr3_0287   | YALIOF12331g | ARAD1D38478g | sporulation |                     |
| GAS3  | YMR215W | DEHA2F06314g | PAS_chr3_0184   | YALIOA03597g | ARAD1C11968g | sporulation |                     |
| GTS1  | YGL181W | DEHA2E04136g | PAS_chr3_1109   | YALIOB09603g | ARAD1D38236g | sporulation |                     |
| ISA1  | YLL027W | DEHA2A06710g | PAS_chr1-1_0110 | YALIOE19206g | ARAD1A14674g | sporulation |                     |
| ISC10 | YER180C | <b>No</b>    | <b>No</b>       | <b>No</b>    | <b>No</b>    | sporulation |                     |
| MSO1  | YNR049C | DEHA2F10692g | PAS_chr3_0529   | YALIOC15532g | ARAD1D30228g | sporulation |                     |
| PRB1  | YEL060C | DEHA2C13882g | PAS_chr1-1_0226 | YALIOB16500g | ARAD1B09218g | sporulation |                     |
| RGR1  | YLR071C | DEHA2E12958g | PAS_chr2-1_0800 | YALIOD07194g | ARAD1A03058g | sporulation |                     |
| RMD8  | YFR048W | DEHA2F22990g | PAS_chr1-4_0597 | YALIOD01914g | ARAD1D46574g | sporulation |                     |
| RRT5  | YFR032C | DEHA2B15246g | PAS_chr1-1_0218 | YALIOF24717g | ARAD1C02904g | sporulation |                     |
| RSC1  | YGR056W | DEHA2C01408g | PAS_chr2-2_0050 | YALIOD20702g | ARAD1B07876g | sporulation |                     |
| SET1  | YHR119W | DEHA2F20834g | PAS_chr2-2_0494 | YALIOB14883g | ARAD1C16016g | sporulation |                     |
| SGA1  | YIL099W | DEHA2A12254g | PAS_chr4_0579   | YALIOE05203g | ARAD1D43296g | sporulation |                     |
| SHC1  | YER096W | DEHA2A09768g | PAS_chr2-1_0261 | YALIOF01925g | ARAD1A12474g | sporulation |                     |
| SLZ1  | YNL196C | DEHA2D09966g | PAS_chr3_0814   | YALIOD24563g | ARAD1C23144g | sporulation |                     |
| SMA1  | YPL027W | <b>No</b>    | <b>No</b>       | <b>No</b>    | <b>No</b>    | sporulation |                     |
| SPO20 | YMR017W | <b>No</b>    | <b>No</b>       | <b>No</b>    | <b>No</b>    | sporulation |                     |
| SPR1  | YOR190W | DEHA2D08426g | PAS_chr2-1_0454 | YALIOF05390g | ARAD1D09680g | sporulation |                     |
| SPR3  | YGR059W | DEHA2G03058g | PAS_FragD_0011  | YALIOD27148g | ARAD1D13882g | sporulation |                     |
| SPR6  | YER115C | <b>No</b>    | <b>No</b>       | <b>No</b>    | <b>No</b>    | sporulation |                     |
| SPS18 | YNL204C | DEHA2C02200g | PAS_chr3_0974   | YALIOC02959g | ARAD1D04510g | sporulation |                     |
| SPS19 | YNL202W | DEHA2C02178g | PAS_chr3_0975   | YALIOC03003g | ARAD1D17534g | sporulation |                     |
| SPS4  | YOR313C | DEHA2G06336g | <b>No</b>       | YALIOF24167g | ARAD1D25850g | sporulation |                     |
| SSO1  | YPL232W | DEHA2B09570g | PAS_chr1-4_0294 | YALIOD25872g | ARAD1A16654g | sporulation |                     |
| SSO2  | YMR183C | DEHA2B09570g | PAS_chr1-4_0294 | YALIOD25872g | ARAD1A16654g | sporulation |                     |

|         |         |              |                 |              |              |             |
|---------|---------|--------------|-----------------|--------------|--------------|-------------|
| SUM1    | YDR310C | No           | No              | No           | No           | sporulation |
| SUR7    | YML052W | DEHA2F12386g | PAS_chr3_1058   | YALIOF12331g | ARAD1D38478g | sporulation |
| SWS2    | YNL081C | DEHA2A11704g | PAS_chr3_0520   | YALIOB06578g | ARAD1D11968g | sporulation |
| TEP1    | YNL128w | DEHA2B06116g | PAS_chr2-2_0351 | YALIOC11033g | ARAD1D24728g | sporulation |
| VPS13   | YLL040C | DEHA2D12430g | PAS_chr1-1_0211 | YALIOF06791g | ARAD1C29854g | sporulation |
| YEL023C | YEL023c | No           | PAS_chr2-1_0470 | YALIOA02893g | ARAD1D50578g | sporulation |
| YFL012W | YFL012W | No           | No              | No           | No           | sporulation |
| YJL147C | YJL147C | No           | No              | No           | No           | sporulation |
| YJL160C | YJL160C | DEHA2B13442g | PAS_chr2-1_0887 | YALIOB20306g | No           | sporulation |
| YLR446W | YLR446W | DEHA2F24618g | PAS_chr1-4_0447 | YALIOE20207g | ARAD1D41822g | sporulation |
| YNL194C | YNL194C | DEHA2F12386g | PAS_chr3_0287   | YALIOF12331g | ARAD1D38478g | sporulation |
| YNL296W | YNL296W | No           | No              | No           | No           | sporulation |
| YOR268C | YOR268C | No           | No              | No           | No           | sporulation |
| YOR338W | YOR338W | DEHA2B05698g | PAS_chr3_0505   | YALIOD12078g | ARAD1B17666g | sporulation |
| AFR1    | YDR085C | DEHA2D03608g | No              | No           | No           | signaling   |
| BAG7    | YOR134W | DEHA2G12122g | PAS_chr2-1_0117 | YALIOD13684g | ARAD1D34584g | signaling   |
| BCY1    | YIL033C | DEHA2A01474g | PAS_chr3_0546   | YALIOF04422g | ARAD1D15356g | signaling   |
| BUD6    | YLR319C | DEHA2C11022g | PAS_chr2-1_0372 | YALIOE27918g | ARAD1D00858g | signaling   |
| CDC24   | YAL041W | DEHA2E11836g | PAS_chr1-4_0533 | YALIOC14828g | ARAD1A02662g | signaling   |
| CDC42   | YLR229C | DEHA2G14168g | PAS_chr2-1_0112 | YALIOB15752g | ARAD1C32340g | signaling   |
| CMK2    | YOL016C | DEHA2F09284g | PAS_chr1-4_0302 | YALIOE27632g | ARAD1B13838g | signaling   |
| CYR1    | YJL005W | DEHA2C17490g | PAS_chr4_0356   | YALIOB18759g | ARAD1C28182g | signaling   |
| DIG2    | YDR480W | DEHA2D15686g | PAS_chr4_0099   | No           | No           | signaling   |
| DSE1    | YER124C | DEHA2D03696g | PAS_chr2-1_0355 | YALIOD09823g | ARAD1B17490g | signaling   |
| FAR1    | YJL157C | DEHA2F13728g | PAS_chr1-3_0307 | YALIOF20680g | ARAD1A10494g | signaling   |
| FUS3    | YBL016W | DEHA2E20086g | PAS_chr2-1_0872 | YALIOE23496g | ARAD1C44286g | signaling   |
| FYV5    | YCL058C | No           | No              | No           | No           | signaling   |
| GPA1    | YHR005C | DEHA2D13618g | PAS_chr1-1_0096 | YALIOE11627g | ARAD1D25520g | signaling   |
| HOS2    | YGL194C | DEHA2A08712g | PAS_chr2-2_0016 | YALIOC06061g | ARAD1B08030g | signaling   |
| NPR3    | YHL023C | DEHA2E02046g | PAS_chr1-4_0385 | YALIOA00682g | ARAD1A18194g | signaling   |
| OPY1    | YBR129C | DEHA2E22264g | PAS_chr3_0666   | YALIOA14476g | ARAD1B02618g | signaling   |
| OXR1    | YPL196W | DEHA2G01320g | PAS_chr2-1_0031 | YALIOE29865g | ARAD1C26774g | signaling   |
| PEA2    | YER149C | DEHA2G11792g | PAS_chr1-3_0291 | No           | No           | signaling   |

|        |         |              |                 |              |              |                        |
|--------|---------|--------------|-----------------|--------------|--------------|------------------------|
| RAS2   | YNL098C | DEHA2F09438g | PAS_chr2-2_0347 | YALIOE08756g | ARAD1B22924g | signaling              |
| RIB5   | YBR256C | DEHA2D13926g | PAS_chr4_0081   | YALIOC01111g | ARAD1C34540g | signaling              |
| RIM13  | YMR154C | DEHA2G20988g | PAS_chr3_0635   | YALIOD14740g | ARAD1A02090g | signaling              |
| ROM2   | YLR371W | DEHA2G05456g | PAS_chr2-1_0586 | YALIOB20218g | ARAD1C21076g | signaling              |
| RSR1   | YGR152C | DEHA2C16544g | PAS_chr2-2_0347 | YALIOF23177g | ARAD1D37928g | signaling              |
| SCP160 | YJL080C | DEHA2C03124g | PAS_chr1-3_0045 | YALIOB21662g | ARAD1B21010g | signaling              |
| SIF2   | YBR103W | DEHA2F15598g | PAS_chr1-4_0201 | YALIOF11165g | ARAD1B23892g | signaling              |
| SNF1   | YDR477W | DEHA2E15180g | PAS_chr2-1_0855 | YALIOD02101g | ARAD1D01078g | signaling              |
| SPA2   | YLL021W | DEHA2E16588g | PAS_chr3_0816   | YALIOF16665g | ARAD1A07238g | signaling              |
| SST2   | YLR452C | DEHA2E10164g | PAS_chr3_0840   | YALIOD18018g | ARAD1A18480g | signaling              |
| TOR1   | YJR066W | DEHA2F23452g | PAS_chr2-1_0557 | YALIOF07084g | ARAD1C30470g | signaling              |
| TOR2   | YKL203C | DEHA2F23452g | PAS_chr2-1_0557 | YALIOF07084g | ARAD1C30470g | signaling              |
| YSP1   | YHR155W | DEHA2E14674g | PAS_chr2-1_0795 | YALIOA09020g | ARAD1B18172g | signaling              |
| YVH1   | YIR026C | DEHA2F20460g | PAS_chr1-3_0193 | YALIOB11572g | ARAD1D30734g | signaling              |
| APC1   | YNL172W | DEHA2D08932g | PAS_chr1-4_0020 | YALIOD16885g | ARAD1D47960g | mitotic cell cycle     |
| APC4   | YDR118W | DEHA2B08316g | PAS_chr3_0477   | YALIOD12705g | ARAD1A12012g | mitotic cell cycle     |
| BIM1   | YER016W | DEHA2D14278g | PAS_chr4_0999   | YALIOA18227g | ARAD1C08734g | mitotic cell cycle     |
| BNI1   | YNL271C | DEHA2E14366g | PAS_chr4_0636   | YALIOD10879g | ARAD1D09262g | mitotic cell cycle     |
| CDC16  | YKL022C | DEHA2C07062g | PAS_chr1-4_0197 | YALIOB15378g | ARAD1C19624g | mitotic cell cycle     |
| CDC23  | YHR166C | DEHA2E02156g | PAS_chr3_1078   | YALIOC10692g | ARAD1D49126g | mitotic cell cycle     |
| CDC27  | YBL084C | DEHA2F20614g | PAS_chr1-3_0148 | YALIOA19712g | ARAD1B03102g | mitotic cell cycle     |
| CDH1   | YGL003C | DEHA2A06864g | PAS_chr2-2_0495 | YALIOC18469g | ARAD1C14036g | mitotic cell cycle     |
| CLB3   | YDL155W | DEHA2G24134g | PAS_chr4_0604   | YALIOB19206g | ARAD1D17908g | mitotic cell cycle     |
| CLB5   | YPR120C | <b>No</b>    | <b>No</b>       | <b>No</b>    | <b>No</b>    | mitotic cell cycle     |
| SMC1   | YFL008W | DEHA2F20020g | PAS_chr2-1_0082 | YALIOE15620g | ARAD1D43648g | mitotic cell cycle     |
| SMC2   | YFR031C | DEHA2B15136g | PAS_chr4_0109   | YALIOF24783g | ARAD1C02948g | mitotic cell cycle     |
| SMC4   | YLR086W | DEHA2B07920g | PAS_chr2-2_0416 | YALIOC19129g | ARAD1B04840g | mitotic cell cycle     |
| SWI5   | YDR146C | DEHA2E03850g | PAS_chr1-3_0099 | YALIOE16973g | ARAD1C37444g | mitotic cell cycle     |
| TID3   | YIL144W | DEHA2E09548g | PAS_chr1-4_0203 | YALIOB11814g | ARAD1C22528g | mitotic cell cycle     |
| XBP1   | YIL101C | DEHA2E10714g | <b>No</b>       | YALIOF16511g | ARAD1D46640g | mitotic cell cycle     |
| DEF1   | YKL054C | DEHA2D17732g | PAS_chr1-1_0470 | YALIOC09933g | ARAD1A01518g | response to DNA damage |
| DIN7   | YDR263C | DEHA2E15444g | PAS_chr1-4_0633 | YALIOE14014g | ARAD1C01540g | response to DNA damage |
| DNL4   | YOR005C | DEHA2G04224g | PAS_chr3_0732   | YALIOD21384g | ARAD1C02090g | response to DNA damage |

|       |         |              |                 |              |              |                        |
|-------|---------|--------------|-----------------|--------------|--------------|------------------------|
| ELC1  | YPL046C | DEHA2D13046g | No              | YALIOA03575g | ARAD1C30866g | response to DNA damage |
| MSH1  | YHR120W | DEHA2F20856g | PAS_chr2-2_0364 | YALIOB10197g | ARAD1C16038g | response to DNA damage |
| POL3  | YDL102W | DEHA2G22308g | PAS_chr2-1_0163 | YALIOA08426g | ARAD1B21362g | response to DNA damage |
| RAD23 | YEL037C | DEHA2B04180g | PAS_chr2-2_0445 | YALIOD16401g | ARAD1A04510g | response to DNA damage |
| RAD54 | YGL163C | DEHA2D05456g | PAS_chr3_0224   | YALIOB07513g | ARAD1A16698g | response to DNA damage |
| RSC2  | YLR357W | DEHA2C01408g | PAS_chr2-2_0050 | YALIOD20702g | ARAD1B07876g | response to DNA damage |
| SIR4  | YDR227W | DEHA2C08778g | PAS_FragB_0067  | YALIOB11770g | ARAD1C09922g | response to DNA damage |
| SMC5  | YOL034W | DEHA2A12606g | PAS_chr1-1_0245 | YALIOE17193g | ARAD1A13508g | response to DNA damage |
| SMC6  | YLR383W | DEHA2A05324g | PAS_chr1-4_0535 | YALIOF02365g | ARAD1C09900g | response to DNA damage |
| SRS2  | YJL092W | DEHA2B14410g | PAS_chr3_0219   | YALIOE27269g | ARAD1B18128g | response to DNA damage |
| APC5  | YOR249C | DEHA2C08668g | No              | YALIOF05478g | ARAD1D19228g | chromatin organization |
| ARD1  | YHR013C | DEHA2G04598g | PAS_chr1-3_0090 | YALIOB05742g | ARAD1A17578g | chromatin organization |
| CAC2  | YML102W | DEHA2F19074g | PAS_chr3_0248   | YALIOB15015g | ARAD1B02090g | chromatin organization |
| CDC26 | YFR036W | No           | No              | No           | No           | chromatin organization |
| MSI1  | YBR195C | DEHA2F07920g | PAS_chr3_1191   | YALIOB13750g | ARAD1C09086g | chromatin organization |
| RLF2  | YPR018W | DEHA2E16060g | PAS_chr3_0814   | YALIOF21637g | ARAD1B23562g | chromatin organization |
| SDS3  | YIL084C | DEHA2A10450g | PAS_chr2-2_0472 | YALIOF25663g | ARAD1D28204g | chromatin organization |
| SIR1  | YKR101W | No           | No              | No           | No           | chromatin organization |
| ULS1  | YOR191W | DEHA2F05676g | PAS_chr2-1_0447 | YALIOF30261g | ARAD1B06094g | chromatin organization |
| ARE2  | YNR019W | DEHA2F24222g | PAS_chr3_0467   | YALIOF06578g | ARAD1B15510g | metabolism             |
| ARN2  | YHL047C | No           | No              | No           | No           | metabolism             |
| CHO1  | YER026C | DEHA2B15686g | PAS_chr1-1_0420 | YALIOD08514g | ARAD1C15444g | metabolism             |
| CLG1  | YGL215W | DEHA2B03630g | PAS_chr4_0189   | YALIOE07898g | ARAD1B01056g | metabolism             |
| DAP1  | YPL170W | DEHA2F14872g | PAS_chr4_0396   | YALIOA20394g | ARAD1C06974g | metabolism             |
| ENA2  | YDR039C | DEHA2C02552g | PAS_chr1-1_0428 | YALIOA01023g | ARAD1D26796g | metabolism             |
| FBP1  | YLR377C | DEHA2F01100g | PAS_chr3_0868   | YALIOA15972g | ARAD1D31196g | metabolism             |
| GLG1  | YKR058W | DEHA2D15070g | PAS_chr4_0847   | YALIOC21065g | ARAD1A01034g | metabolism             |
| GNA1  | YFL017C | DEHA2B05126g | PAS_chr4_0060   | YALIOD20152g | ARAD1D45914g | metabolism             |
| GTT1  | YIR038C | DEHA2D16280g | PAS_chr2-2_0116 | YALIOF25575g | ARAD1D41712g | metabolism             |
| KGD1  | YIL125W | DEHA2F17798g | PAS_chr2-1_0089 | YALIOE33517g | ARAD1A11814g | metabolism             |
| NEM1  | YHR004C | DEHA2B02970g | PAS_chr2-1_0248 | YALIOC02849g | ARAD1D07832g | metabolism             |
| PCT1  | YGR202C | DEHA2G21560g | PAS_chr2-2_0401 | YALIOD18271g | ARAD1B14960g | metabolism             |
| PDC1  | YLR044C | DEHA2G18348g | PAS_chr3_0188   | YALIOD10131g | ARAD1D26004g | metabolism             |

|       |         |              |                 |              |              |            |
|-------|---------|--------------|-----------------|--------------|--------------|------------|
| PGM2  | YMR105C | DEHA2C05258g | PAS_chr1-4_0264 | YALIOE02090g | ARAD1D37224g | metabolism |
| PMC1  | YGL006W | DEHA2A09086g | PAS_chr1-1_0117 | YALIOD04873g | ARAD1A06798g | metabolism |
| RKI1  | YOR095C | DEHA2A09328g | PAS_chr4_0213   | YALIOB06941g | ARAD1C12474g | metabolism |
| SUR4  | YLR372W | DEHA2G05478g | PAS_chr3_0236   | YALIOB20196g | ARAD1C21098g | metabolism |
| XKS1  | YGR194C | DEHA2C06974g | PAS_chr1-1_0280 | YALIOF10923g | ARAD1C08800g | metabolism |
| ACF2  | YLR144C | DEHA2G00726g | PAS_chr1-1_0130 | YALIOB17996g | ARAD1D27192g | other      |
| ACT1  | YFL039C | DEHA2D05412g | PAS_chr3_1169   | YALIOD08272g | ARAD1A06666g | other      |
| ADY2  | YCR010C | DEHA2F17996g | PAS_chr1-1_0158 | YALIOC23617g | ARAD1A09152g | other      |
| ATG8  | YBL078C | DEHA2D03960g | PAS_chr4_0704   | YALIOE02662g | ARAD1C41976g | other      |
| CCH1  | YGR217W | DEHA2D14586g | PAS_chr2-1_0301 | YALIOE15334g | ARAD1D08602g | other      |
| CDC3  | YLR314C | DEHA2D12540g | PAS_chr4_0548   | YALIOD23595g | ARAD1D21428g | other      |
| CHS1  | YNL192W | DEHA2D03916g | PAS_chr1-1_0393 | YALIOD25938g | ARAD1C33682g | other      |
| CYB2  | YML054C | DEHA2D05522g | PAS_chr4_0272   | YALIOE21307g | ARAD1C32274g | other      |
| ECM4  | YKR076W | DEHA2C16566g | PAS_chr2-1_0315 | YALIOB20416g | ARAD1C31680g | other      |
| ESC8  | YOL017W | DEHA2F23958g | No              | No           | No           | other      |
| GDI1  | YER136W | DEHA2F25102g | PAS_chr3_0531   | YALIOE33649g | ARAD1C04994g | other      |
| HHO1  | YPL127C | DEHA2C16478g | PAS_chr1-4_0282 | YALIOB16280g | ARAD1B19515g | other      |
| HO    | YDL227C | No           | No              | No           | No           | other      |
| HTZ1  | YOL012C | DEHA2E05720g | PAS_chr4_0157   | YALIOF02827g | ARAD1C32890g | other      |
| HUL4  | YJR036C | DEHA2F11704g | PAS_chr2-1_0469 | YALIOD15444g | ARAD1C07260g | other      |
| KRE9  | YJL174W | DEHA2B10318g | PAS_chr3_0960   | YALIOF17490g | ARAD1D45056g | other      |
| LEE1  | YPL054W | DEHA2D15928g | PAS_chr4_0104   | YALIOB12540g | ARAD1D45232g | other      |
| MPT5  | YGL178W | DEHA2C14278g | PAS_chr3_0438   | YALIOE10395g | ARAD1C41778g | other      |
| NAM8  | YHR086W | DEHA2F23276g | PAS_chr1-4_0223 | YALIOD04917g | ARAD1A08470g | other      |
| NAT1  | YDL040C | DEHA2E11506g | PAS_chr1-1_0373 | YALIOF12221g | ARAD1A15906g | other      |
| NPT1  | YOR209C | DEHA2G23870g | PAS_chr2-1_0221 | YALIOB00220g | ARAD1C17842g | other      |
| PFY1  | YOR122C | DEHA2G14784g | PAS_chr3_0106   | YALIOB07183g | ARAD1C39402g | other      |
| PGI1  | YBR196C | DEHA2F13156g | PAS_chr3_0456   | YALIOF07711g | ARAD1C38940g | other      |
| PIB1  | YDR313C | DEHA2E08030g | PAS_chr1-1_0290 | YALIOD15510g | ARAD1D31174g | other      |
| PIN3  | YPR154W | DEHA2B14476g | PAS_chr4_0500   | YALIOC04114g | ARAD1D13046g | other      |
| RFM1  | YOR279C | No           | No              | No           | No           | other      |
| RMD5  | YDR255C | DEHA2D13024g | PAS_chr3_0209   | YALIOA18788g | ARAD1C30844g | other      |
| SCW11 | YGL028C | DEHA2E22440g | PAS_chr2-1_0052 | YALIOE21109g | ARAD1D24156g | other      |

|       |         |              |                 |                 |              |       |
|-------|---------|--------------|-----------------|-----------------|--------------|-------|
| SKT5  | YBL061C | DEHA2A09768g | PAS_chr2-1_0261 | YALIOF01925g    | ARAD1A12474g | other |
| SNF4  | YGL115W | DEHA2B07282g | PAS_chr2-1_0608 | YALIOC03421g*** | ARAD1C13068g | other |
| STU1  | YBL034C | DEHA2F25872g | PAS_chr3_0913   | YALIOD21912g    | ARAD1C41008g | other |
| SYF2  | YGR129W | DEHA2C03366g | PAS_chr4_0309   | YALIOB03036g    | ARAD1C04378g | other |
| TOS7  | YOL019W | DEHA2G08932g | PAS_chr3_0919   | YALIOE33627g    | ARAD1A07766g | other |
| UBC11 | YOR339C | <b>No</b>    | <b>No</b>       | <b>No</b>       | <b>No</b>    | other |

\*see Kuberl et al. 2011

\*\*New gene

\*\*\*Pseudo
