# Supplementary material for: The complete genome of Blastobotrys (Arxula) adeninivorans LS3 - a yeast of biotechnological interest
Source: PubMed Central journal article supplement (PMC4022394; doi:10.1186/1754-6834-7-66), 2014-04-24
Supplement: 1754-6834-7-66-S14.pdf [file 1754-6834-7-66-S14.pdf]

## Additional File 14. Mating pheromones

A potential candidate for MF $\alpha$  was identified in *A. adenivorans* as the product of ARAD1C26928g, which contains eleven repeats of a 13 amino-acid peptide (IPKWEQM/LPGQPID) matching the sequence of other yeast MF $\alpha$  (Fig. S13A). Consensus processing sites for the signal peptidase and for Kex2p are present, but not for Ste13 since there are no X-Ala/X-Pro repeats. This suggests that MF $\alpha$  processing in *A. adenivorans* is atypical: either there is only Kex2-like processing and 19 amino acid pheromones would be produced, partially divergent at their N-terminus, or another proteolytic machinery is involved in N-terminal trimming (Fig. S13B). We note that genes encoding Kex2, Kex1 and Ste13 genes exist in the sequenced strain.

The genes encoding the precursors of the other mating pheromone MF $\alpha$  are very short sized and poorly conserved, making them difficult to identify in genomes distant from *S. cerevisiae* without synteny data <sup>22</sup>. A possible candidate encoded by ARAD1D33583g was detected after a search for short proteins ending in CAAX required for prenylation and carboxylmethylation of Mfap (Fig. S13C). The 44 amino acid gene product is poorly conserved outside from its C-terminal CVIA motif, thus preventing prediction of the N-terminal processing sites <sup>23</sup>. All the machinery necessary for maturation and export of MF $\alpha$  is well conserved.

### Figure S14A Precursors of MF $\alpha$ in hemiascomycetous yeasts.

Over lining indicates: green= signal peptide; grey= prodomain, blue= dibasic aminoacids (Kex2 site); yellow= Xala/Xpro repeats (Ste13 processing); red= mating pheromone alpha. Notice absence of Xala/Xpro repeats in *A. adenivorans* pheromone precursor.

### Figure S14B Alignment of alpha pheromones of representative species of hemiascomycetes.

Alignments were generated using Multalin and manually adjusted.

### Figure S14C Alignment of *A. adenivorans* putative precursor of pheromone $\alpha$ (Mfap).

Sequences are derived from: *S. cerevisiae* YDR461W (Sace\_MFA1), *S. cerevisiae* YNL145W (Sace\_MFA2), *C. glabrata* CAGLOC01919g (Cagl\_MFA2), *Naumovozyma (Saccharomyces) castellii* Scas564.10d1 (Nacas\_MFA), *Eremothecium (Ashbya) gossypii* ABL196Cp (Ergo\_MFA2), *C. albicans* orf19.2164.1 (Caal\_MFA1), *Y. lipolytica* YALI0C17028g (Yali\_MFA2), and *A. adenivorans* ARAD1D33583g. Note that loss of the conserved DN landmark prevents definition of the N-terminal processing site. Sequences were aligned using ClustalX2.

>YPL187wp *S. cerevisiae*  
 MRFPISFTAVLFAASSALAAPVNTTEDETAQIPAEAVIGYLDLEGDFDVALPFSNSTNGLLFINTSIAAKEEGVSLDKREAEAWH  
 WLQLKPGQPMYKREAEAEAWHWLQLKPGQPMYKREADAEAWHWLQLKPGQPMYKREADAEAWHWLQLKPGQPMY

>DEHA2F19580p *D. hansenii*  
 MKFSIFALTTLVSTISLAAAAPTDPDSTETGKYVVDYLVPDEAINNKVEITDDQQLVVEESGKKYVLIVNATLAESVISKAGIDIE  
 GLEAAFAKSDDTASVSKRDANADAEAKFHWMTYRFFQPnlRKREANADAKFHWMTYRFFQPnlKKREANADAEAKFHWMTYR  
 FFQPnlKKREANAANADAKFHWMTYRFFQPnlKKREANADAEAKFHWMTYRFFQPnl

>PAS\_chr2-1\_0883p *K. pastoris*  
 MKSLILNIISVTLAITSTAASAPVESIFANQPDSSTLDTNDGVGVMSTIKEEDFGKHFVENQILDEAVIMSLKLRKGVNLFLLDDI  
 GLATELIGNKIAQIEAIDLSERLAQSWTNIKNRFLGKREAEAEAEAEAEFRWRNNEKNQPFgKREAEAEAEAEAEAEAEAEAEFRW  
 RNNEKNQPFgKREAEAEAEAEAEAEAEAEAEFRWRNNEKNQPFgKREAEAEAEAEAEAEAEAEAEFRWRNNEKNQPFgKREADAEAEAEAEAEFR  
 WRNNEKNQPFgKREAEAEAEAEAEAEAEAEAEFRWRNNEKNQPFgKREAEAEAEAEAEAEAEAEAEFRWRNNEKNQPFgKREAEAEAEAEAEFRWRN  
 NEKNQPFgKREADAEAEAEAEAEAEAEAEAEFRWRNNEKNQPFgKREASIDTGTDDGAYWSWRKNSVLERQ

>ARAD1C26928p *A. adenivorans*  
 MHLKASFLLLIATAIVSTAAPISGDQNVTEPDVDHQIPECQPRSPPIDRRDEKWEPIPKWEQMPGQPIDKRDEKWKPIPK  
 WEQLPGQPIDRRDVKWEPNIPKWEQMPGQPIDKRDEKWPDIKWEQMPGQPIDKRDVKWKPIPKWEQMPGQPIDRRDV  
 KWTPDIKWEQMPGQPIDRRDVKWTPDIKWEQMPGQPIDKRDVKWEPNIPKWEQMPGQPIDKRDVKWKPIPKWEQMP  
 GQPIDKRDVWRWKPIPKWEQMPGQPIDK

>YALI0E16533p *Y. lipolytica*  
 MKFSTIALAAVACLVAAPAAPVGTGSHGPQSIPEEAIVGGLQGTENEIVFFNDDESgKQGIADAKKAQEAQFMDPQPDSEV  
 AAGNAKREASPEAWRWFwLPGYGEpNWKRdAMPADMDKEKREANPEAWRWFwLPGYGEpNWKRdAMPADMDKEKREAN  
 PEAWRWFwLPGYGEpNWKRdAMPADMDKEKREANPEAWRWFwLPGYGEpNW

\*

|        |   |     |              |   |    |
|--------|---|-----|--------------|---|----|
| Sace   | : | -WH | LQLKP-GQP-MY | : | 13 |
| Klla   | : | -WS | ITLRP-GQP-IF | : | 13 |
| Klth   | : | -WR | LSLSR-GQP-MY | : | 13 |
| Sakl_1 | : | -WH | LSFSK-GEP-MY | : | 13 |
| Zyro   | : | --H | IELDP-GQP-MF | : | 12 |
| Arad   | : | IPK | EQMPG--QP-ID | : | 13 |
| Pipa   | : | -FR | RNNEK-NQP-FG | : | 13 |
| Sakl_2 | : | -WH | LSFSF-GEP-LY | : | 13 |
| Cagl   | : | -WH | VKIRK-GQG-LF | : | 13 |
| Piso_1 | : | KFH | FKYNN-FDP-IT | : | 14 |
| Piso_2 | : | KFH | FTYSN-FDP-IT | : | 14 |
| Deha   | : | KFH | MTYRF-FQPnlR | : | 15 |
| Yali   | : | -WR | FWLPGYGEp-NW | : | 14 |

Figure S14A

Figure S14B

# Figure S14C

|                  |   |            |           |              |           |      |           |     |          |     |            |       |       |    |     |      |      |              |      |
|------------------|---|------------|-----------|--------------|-----------|------|-----------|-----|----------|-----|------------|-------|-------|----|-----|------|------|--------------|------|
|                  |   | *          |           | 20           |           | *    |           | 40  |          | *   |            | 60    |       | *  |     |      |      |              |      |
| Sace_MFA1        | : | -----MQP   | --        | STATAAPKEKTS | SEKKDN    | ---- | YIIKG     | --  | VFWD     | DP  | -----      | ----- | ----- | AC | VIA | : 36 |      |              |      |
| Sace_MFA2        | : | -----MQP   | IT        | ASTQATQKDKS  | SEKKDN    | ---- | YIIKG     | --  | LFWD     | DP  | -----      | ----- | ----- | AC | VIA | : 38 |      |              |      |
| Cagl_MFA2        | : | -----MQP   | ---       | TIEATQKDN    | TQEKRDN   | ---- | YIVKG     | --  | FFW      | SP  | -----      | ----- | ----- | DC | VIA | : 34 |      |              |      |
| Naca_MFA         | : | -----MQP   | ---       | TTQATHKDN    | SAEKQDN   | ---- | YIVKG     | --  | LFWD     | DP  | -----      | ----- | ----- | AC | VIA | : 34 |      |              |      |
| Ergo_MFA2        | : | -----MQL   | ----      | TNNTNKDE     | STENKDN   | ---- | WIAKG     | --  | YMW      | TP  | -----      | ----- | ----- | QC | VIV | : 33 |      |              |      |
| Caal_MFA1        | : | -----MAA   | QQ        | SKKTGSGQTKDK | DAAKNN    | AVRS | VSTG      | --  | NCC      | ST  | -----      | ----- | ----- | CS | VV  | : 42 |      |              |      |
| ARAD1D33583g     | : | -----MYE   | EP        | VAIEFAVSR    | PQSGVRV   | PPR  | ---       | VVM | IAEM     | NLQ | GP         | ----- | ----- | SI | SC  | VIA  | : 44 |              |      |
| Yali_MFA2        | : | MTSWFDILQL | AK        | QHKSHQSLAVD  | NNKNDK    | TKAP | LLPL      | QDN | MAHYD    | PS  | WT         | HE    | QKVQ  | EV | KRR | QSQS | FRL  | CVIA         | : 72 |
| <b>Consensus</b> |   |            | <b>qp</b> |              | <b>kd</b> |      | <b>dn</b> |     | <b>g</b> |     | <b>w P</b> |       |       |    |     |      |      | <b>CVI a</b> |      |
